# Supplementary material for: Visible-light-mediated arylation of ortho-hydroxyarylenaminones: direct access to isoflavones
Source: Royal Society of Chemistry journal article supplement (doi:10.1039/c9cc09945j), 2020-01-01
Supplement: c9cc09945j1.pdf [file c9cc09945j1.pdf]

# **Visible light-mediated arylation of *ortho*-hydroxyarylenaminones: Direct access to isoflavones.**

Satenik Mkrtchyan\*, Viktor O. Iaroshenko.\*

Laboratory of Homogeneous Catalysis and Molecular Design at the Centre of Molecular and Macromolecular Studies, Polish Academy of Sciences,  
Sienkiewicza 112, PL-90-363 Łódź, Poland. E-mail: [iva108@gmail.com](mailto:iva108@gmail.com) , [viktori@cbmm.lodz.pl](mailto:viktori@cbmm.lodz.pl)

## Table of Contents

|                                                              |    |
|--------------------------------------------------------------|----|
| (A) Experimental Section.....                                | 3  |
| (B) Characterization of products.....                        | 9  |
| (C) Copies $^1\text{H}$ and $^{13}\text{C}$ NMR spectra..... | 27 |

## (A) Experimental Section.

Commercially available starting materials, reagents, catalysts, anhydrous and degassed solvents were used without further purification. Flash column chromatography was performed with Merck Silica gel 60 (230-400 mesh). The solvents for column chromatography were distilled before the use. Thin layer chromatography was carried out using Merck TLC Silica gel 60 F<sub>254</sub> and visualized by short-wavelength ultraviolet light or by treatment with potassium permanganate (KMnO<sub>4</sub>) stain. <sup>1</sup>H, <sup>13</sup>C and <sup>19</sup>F NMR spectra were recorded on a Bruker 250 and 500 MHz at 20°C. All <sup>1</sup>H NMR spectra are reported in parts per million (ppm) downfield of TMS and were measured relative to the signals for CHCl<sub>3</sub> (7.26 ppm) and DMSO (2.50 ppm). All <sup>13</sup>C NMR spectra were reported in ppm relative to residual CHCl<sub>3</sub> (77.00 ppm) or DMSO (39.70 ppm) and were obtained with <sup>1</sup>H decoupling. Coupling constants, *J*, are reported in Hertz (Hz). Gas chromatographic analyses was performed on Gas Chromatograph Mass Spectrometer GCMS-QP2010 Ultra instrument.

The optimal reaction conditions were identified by Microscale High-Throughput Experimentation Screening. Parallel synthesis was accomplished in an MBraun glovebox operating with a constant Ar-purge (oxygen and water <5 ppm). Screening reactions were carried out in 10 mL vials using suitable heating blocks. Liquid chemicals were dosed using gas tight micro syringes. Isolation of obtained compounds was achieved by column chromatography on Silica gel.

### ***General procedure for the synthesis of aryl diazonium tetrafluoroborates starting from commercial anilines.***

An appropriate aniline (20 mmol) was added dropwise to the mixture of aqueous HBF<sub>4</sub> 48% (40 mmol, 5.2 mL) and absolute EtOH (7 mL) placed in 50 mL round bottom-flask. Subsequently, the reaction mixture was stirred until total homogeneity, followed by the slow addition of *t*-BuONO 90% (40 mmol, 5.4 mL) at 0°C. Afterwards, the mixture was stirred intensively for 10 minutes at 0°C and additionally for 30 minutes at room temperature. Finally, addition of Et<sub>2</sub>O (20 mL) caused precipitation of the title diazonium salt which was filtrated and washed 4 times with Et<sub>2</sub>O, then dried in vacuum.

**Aryl part:**

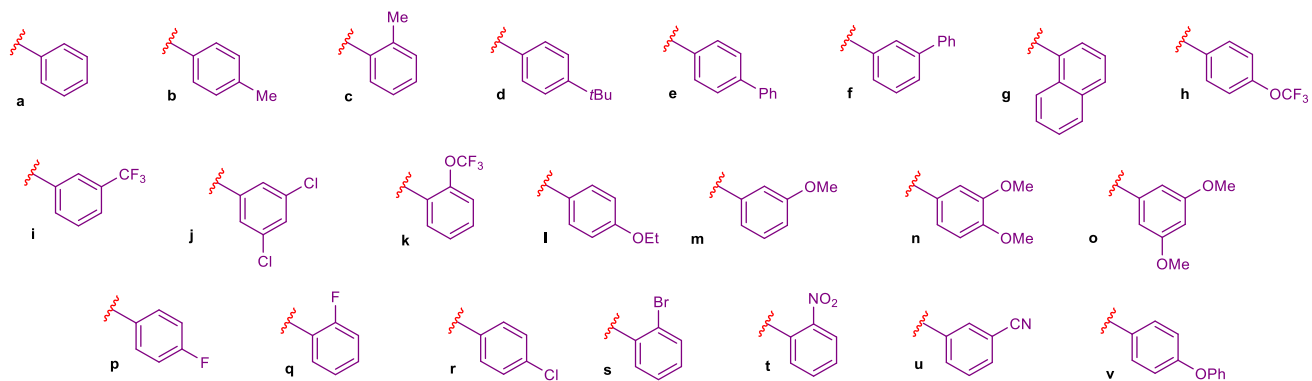

**Scheme 1.** List of aryl substituents.

**Scope of *ortho*-hydroxyarylenaminones **1**:**

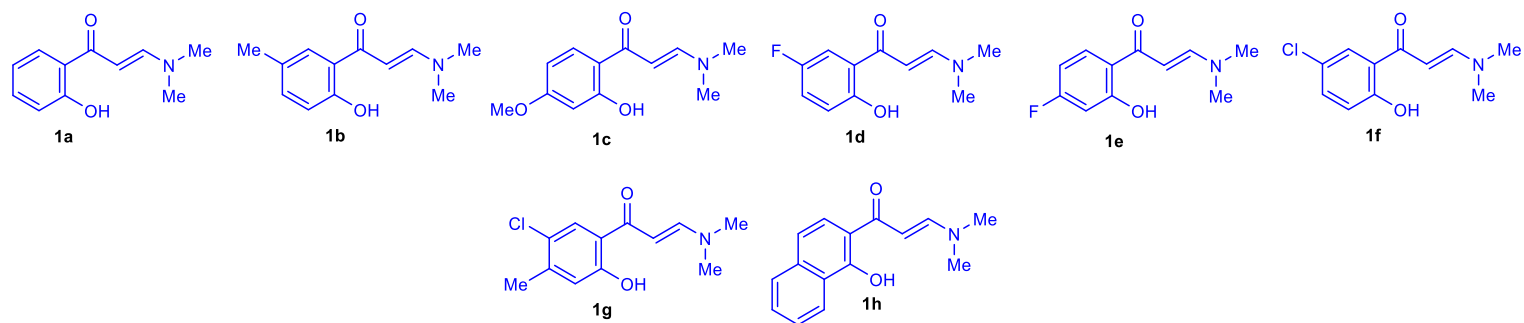

**Scheme 2.** List of *ortho*-hydroxyarylenaminones **1** used for preparation of 3-arylchromones.



**Scope of diazonium tetrafluoroborates **2**:**

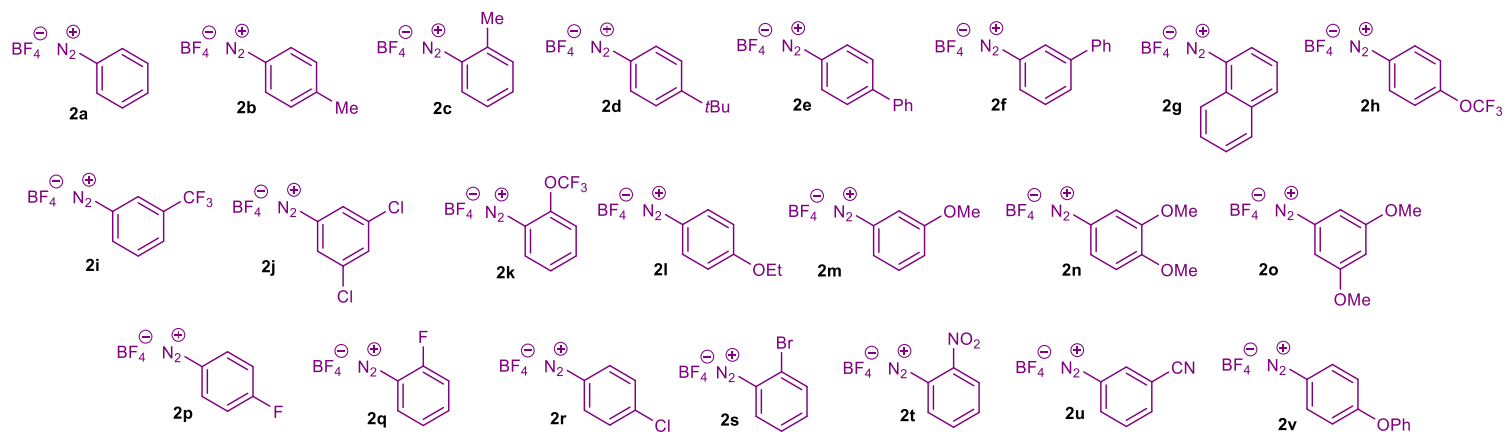

**Scheme 3.** List of diazonium tetrafluoroborates **2** used for preparation of 3-arylchromones.

**Scope of diaryliodonium triflates **3**:**

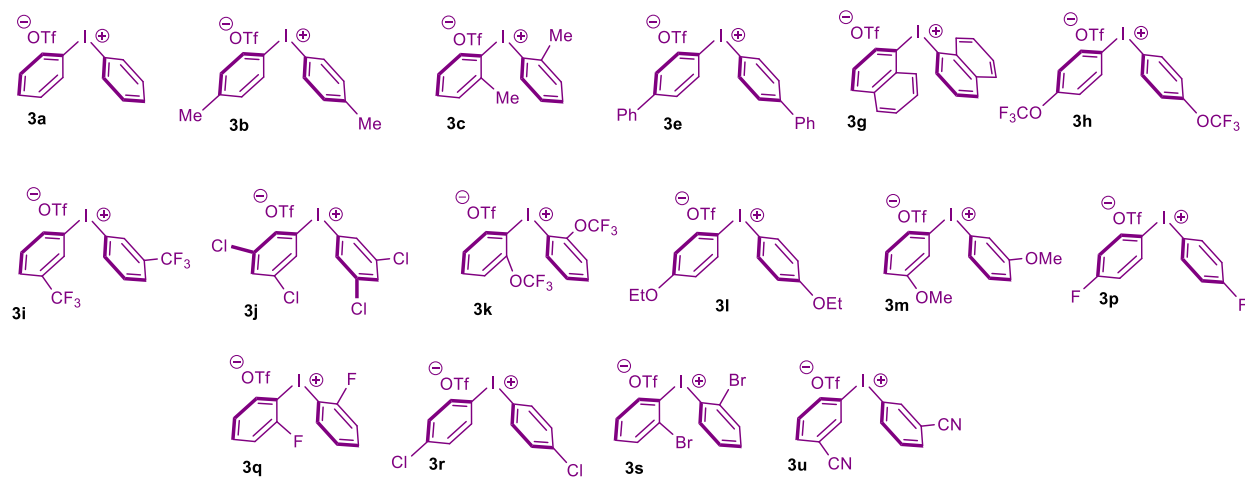

**Scheme 4.** List of diaryliodonium triflates **3** used for preparation of 3-arylchromones.

# 1. Reaction condition screening for arylation of *ortho*-hydroxyarylenaminones.

**Table S1.** Optimization of the reaction conditions.

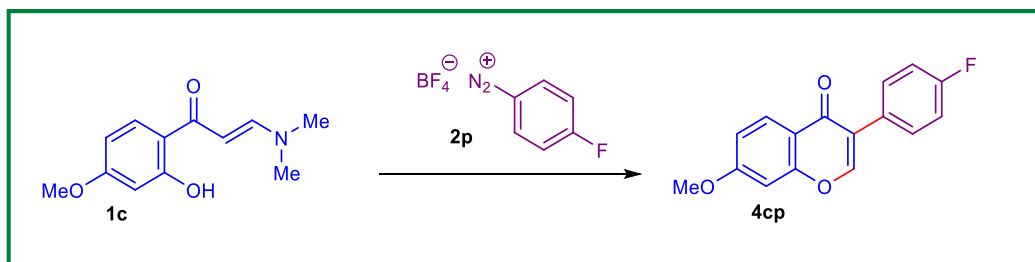

| Reaction (a) <sup>b</sup> |                                                                                     |                  |                          |                                   |
|---------------------------|-------------------------------------------------------------------------------------|------------------|--------------------------|-----------------------------------|
| entry                     | catalysts (equiv.)/reagent (equiv.)/additive                                        | light source     | Solvent/temperature/time | yield (%) <b>4cp</b> <sup>a</sup> |
| 1                         | Eosin Y (0.03)/diazonium salt (1.5)                                                 | Green LED        | MeOH/10h                 | 52                                |
| 2                         | Eosin Y (0.03)/diazonium salt (1.5)                                                 | Green LED        | CH <sub>3</sub> CN/10h   | 44                                |
| 3                         | Eosin Y (0.03)/diazonium salt (1.5)                                                 | Green LED        | DMSO/10h                 | 87                                |
| <b>4</b>                  | <b>Eosin Y (0.03)/diazonium salt (1.3)</b>                                          | <b>Green LED</b> | <b>DMSO/3h</b>           | <b>86</b>                         |
| 5                         | Eosin Y (0.03)/diazonium salt (1.3)                                                 | NO               | DMSO/3h                  | 0 <sup>c</sup>                    |
| 6                         | diazonium salt (1.3)                                                                | Green LED        | DMSO/3h                  | 0 <sup>c</sup>                    |
| 7                         | Eosin Y (0.03)/diazonium salt (1.3)/TEMPO (1.5)                                     | Green LED        | DMSO/3h                  | 0 <sup>c</sup>                    |
| 8                         | Porphyrin (0.015)/diazonium salt (1.5)                                              | Blue LED         | DMSO/10h                 | 33                                |
| 9                         | <i>fac</i> -Ir(ppy) <sub>3</sub> (0.01)/diazonium salt (1.3)                        | Blue LED         | CH <sub>3</sub> CN/10h   | 75                                |
| <b>10</b>                 | <b><i>fac</i>-Ir(ppy)<sub>3</sub> (0.01)/diazonium salt (1.3)</b>                   | <b>Blue LED</b>  | <b>DMSO/10h</b>          | <b>79</b>                         |
| 11                        | Ru(bpy) <sub>3</sub> Cl <sub>2</sub> *6H <sub>2</sub> O (0.02)/diazonium salt (1.5) | Blue LED         | DMSO/10h                 | 43                                |
| 12                        | Ru(bpm) <sub>3</sub> Cl <sub>2</sub> *6H <sub>2</sub> O (0.02)/diazonium salt (1.5) | Blue LED         | DMSO/10h                 | 47                                |

<sup>a</sup> Isolated yield. <sup>b</sup> All reactions were conducted at room temperature in inert atmosphere. <sup>c</sup> These experiments were analyzed by both <sup>1</sup>H NMR and GC/MS techniques.

**Table S2.** Optimization of the reaction conditions.

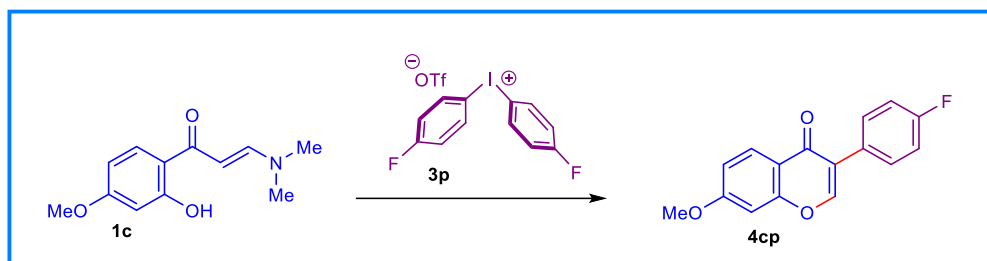

| Reaction (b) <sup>b</sup> |                                                                                                      |                 |                            |                                  |
|---------------------------|------------------------------------------------------------------------------------------------------|-----------------|----------------------------|----------------------------------|
| entry                     | catalysts (equiv.)/reagent (equiv.)                                                                  | light source    | solvent/time               | yield (%) <b>4cp<sup>a</sup></b> |
| 1                         | <i>fac</i> -Ir(ppy) <sub>3</sub> (0.01)/diaryliodonium salt (1.5)                                    | Blue LED        | MeOH/12h                   | 61                               |
| <b>2</b>                  | <b><i>fac</i>-Ir(ppy)<sub>3</sub> (0.01)/diaryliodonium salt (1.5)</b>                               | <b>Blue LED</b> | <b>DMSO /12h</b>           | <b>77</b>                        |
| 3                         | Ru(bpy) <sub>3</sub> Cl <sub>2</sub> *6H <sub>2</sub> O (0.02)/diaryliodonium salt (1.5)             | Blue LED        | DMSO/12h                   | 57                               |
| 4                         | Ru(bpy) <sub>3</sub> Cl <sub>2</sub> *6H <sub>2</sub> O (0.02)/diaryliodonium salt (1.5)             | Blue LED        | MeOH/12h                   | 28                               |
| 5                         | Ru(bpy) <sub>3</sub> Cl <sub>2</sub> *6H <sub>2</sub> O (0.02)/diaryliodonium salt (1.5)             | Blue LED        | CH <sub>3</sub> CN/12h     | 79                               |
| <b>6</b>                  | <b>Ru(bpy)<sub>3</sub>Cl<sub>2</sub>*6H<sub>2</sub>O (0.02)/diaryliodonium salt (1.5)</b>            | <b>Blue LED</b> | <b>CH<sub>3</sub>CN/4h</b> | <b>80</b>                        |
| 7                         | Ru(bpy) <sub>3</sub> Cl <sub>2</sub> *6H <sub>2</sub> O (0.02)/diaryliodonium salt (1.8)             | Blue LED        | CH <sub>3</sub> CN/4h      | 80                               |
| 8                         | Ru(bpy) <sub>3</sub> Cl <sub>2</sub> *6H <sub>2</sub> O (0.02)/diaryliodonium salt (1.3)             | Blue LED        | CH <sub>3</sub> CN/4h      | 69                               |
| 9                         | Ru(bpy) <sub>3</sub> Cl <sub>2</sub> *6H <sub>2</sub> O (0.02)/diaryliodonium salt (1.5)             | NO              | CH <sub>3</sub> CN/4h      | 0 <sup>c</sup>                   |
| 10                        | diaryliodonium salt (1.5)                                                                            | Blue LED        | CH <sub>3</sub> CN/4h      | 0 <sup>c</sup>                   |
| 11                        | Ru(bpy) <sub>3</sub> Cl <sub>2</sub> *6H <sub>2</sub> O (0.02)/diaryliodonium salt (1.5)/TEMPO (1.7) | Blue LED        | CH <sub>3</sub> CN/4h      | 0 <sup>c</sup>                   |
| 12                        | Ru(bpm) <sub>3</sub> Cl <sub>2</sub> *6H <sub>2</sub> O (0.02)/diaryliodonium salt (1.5)             | Blue LED        | CH <sub>3</sub> CN/4h      | 64                               |
| 13                        | Ru(bpz) <sub>3</sub> Cl <sub>2</sub> *6H <sub>2</sub> O(0.02)/diaryliodonium salt (1.5)              | Blue LED        | CH <sub>3</sub> CN/4h      | 60                               |
| 14                        | [Cu(dpp) <sub>2</sub> ]PF <sub>6</sub> (0.02)/diaryliodonium salt (1.5)                              | Green LED       | CH <sub>3</sub> CN/12h     | 0                                |
| 15                        | [Cu(dpp) <sub>2</sub> ]PF <sub>6</sub> (0.02)/diaryliodonium salt (1.5)                              | Green LED       | DMSO/12h                   | 0                                |
| 16                        | [Cu(dap) <sub>2</sub> ]PF <sub>6</sub> (0.02)/diaryliodonium salt (1.5)                              | Green LED       | CH <sub>3</sub> CN/12h     | 0                                |

<sup>a</sup> Isolated yield. <sup>b</sup> All reactions were conducted at room temperature in inert atmosphere. <sup>c</sup> These experiments were analyzed by both <sup>1</sup>H NMR and GC/MS techniques.

## 2. Reaction procedures with optimised reaction conditions.

Protocol A: **General procedure for the synthesis of 3-arylchromones 4 by reaction of ortho-hydroxyarylenaminones with aryl diazonium tetrafluoroborates.** Under inert atmosphere (glovebox operating with a constant Ar-purge) to a 10 mL vial equipped with a stir bar was placed photocatalyst Eosin Y (19.5 mg, 0.03 mmol, 0.03 equiv.), appropriate *ortho*-hydroxyarylenaminone (1.0 mmol, 1.0 equiv.) and appropriate aryl diazonium tetrafluoroborate (1.3 mmol, 1.3 equiv.). Afterwards, dry DMSO (0.2 mmol/mL) was added and the reaction vial was properly capped by Teflon Mininert Valve. Finally, the reaction vial was removed from the glovebox and subjected to irradiation under vigorous stirring using 24 W green (525±5 nm) LED strips for 3 hours. The reaction was controlled by both GC MS and TLC. After completion the reaction mixture was evaporated till the dryness using an oil pump and the crude was directly subjected to gradient flash chromatography on silica gel using appropriate mixture of hexane/ethyl acetate as eluent to isolate the desired chromone derivative. The gram scale synthesis was conducted on 10 mmol of the starting *ortho*-hydroxyarylenaminone.

Protocol B: **General procedure for the synthesis of 3-arylchromones 4 by reaction of ortho-hydroxyarylenaminones with diaryliodonium triflates.** Under inert atmosphere (glovebox operating with a constant Ar-purge) to a 20 mL vial equipped with a stir bar was placed photocatalyst Ru(bpy)<sub>3</sub>Cl<sub>2</sub>·6H<sub>2</sub>O (15.0 mg, 0.02 mmol, 0.02 equiv.), appropriate *ortho*-hydroxyarylenaminone (1.0 mmol, 1.0 equiv.) and appropriate diaryliodonium triflate (1.5 mmol, 1.5 equiv.). Afterwards, dry CH<sub>3</sub>CN (0.12 mmol/mL) was added and the reaction vial was properly capped by Teflon Mininert Valve. Finally, the reaction vial was removed from the glovebox and subjected to irradiation under vigorous stirring using 34 W blue LED lamps (Kessil KSH150B Blue LED Grow Light; 5 cm - 6 cm away, with cooling fan on top to keep the reaction mixture at room temperature) for 4 hours. The reaction was controlled by both GC MS and TLC. After completion the reaction mixture was evaporated till the dryness using rotary evaporator and the crude was directly subjected to gradient flash chromatography on silica gel using appropriate mixture of hexane/ethyl acetate as eluent to isolate the desired chromone derivative. Compounds **4bg**, **4ci**, **4cp**, **4db**, **4fa**, **4hq** were prepared starting from corresponding diaryliodonium hexafluorophosphates following the same procedure. The gram scale synthesis was conducted on 10 mmol of the starting *ortho*-hydroxyarylenaminone.

## (B) Characterization of products.

### 3-([1,1'-biphenyl]-3-yl)-4H-chromen-4-one (**4af**).

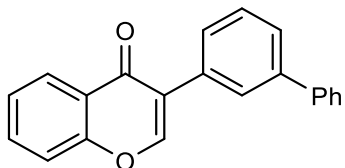

The title compound was prepared by following **protocol A** starting from photocatalyst Eosin Y (19.5 mg, 0.03 mmol, 0.03 equiv.), (E)-3-(dimethylamino)-1-(2-hydroxyphenyl)prop-2-en-1-one **1a** (191 mg, 1.0 mmol, 1.0 equiv.), [1,1'-biphenyl]-3-diazonium diazonium tetrafluoroborate **2f** (348 mg, 1.3 mmol, 1.3 equiv.) and dry DMSO (0.2 mmol/mL).

Purification was accomplished by gradient flash chromatography on silica gel using a mixture of hexane/ethyl acetate

5:1 to 3:1 as eluent to isolate the desired chromone derivative **4af** (256 mg, 0.86 mmol, 86%).

Light yellow solid, mp 184-185 °C.  $^1\text{H}$  NMR (500 MHz,  $\text{CDCl}_3$ ):  $\delta$  7.35 – 7.38 (m, 1H,  $\text{CH}_{\text{Ar}}$ ), 7.44 – 7.47 (m, 3H,  $\text{CH}_{\text{Ar}}$ ), 7.50 – 7.58 (m, 3H,  $\text{CH}_{\text{Ar}}$ ), 7.62 – 7.67 (m, 3H,  $\text{CH}_{\text{Ar}}$ ), 7.69 – 7.72 (m, 1H,  $\text{CH}_{\text{Ar}}$ ), 7.81 – 7.82 (m, 1H,  $\text{CH}_{\text{Ar}}$ ), 8.09 (s, 1H,  $\text{CH}_{\text{Ar}}$ ), 8.34 (dd, 1H,  $^3J = 8.0$  Hz,  $^4J = 1.4$  Hz,  $\text{CH}_{\text{Ar}}$ ).

$^{13}\text{C}$  NMR (126 MHz,  $\text{CDCl}_3$ ):  $\delta$  118.1, 124.6, 125.3, 125.4, 126.5, 127.1, 127.4, 127.5, 127.8, 127.9, 128.8, 129.0, 132.4, 133.7, 141.0, 141.6, 153.2, 156.3, 176.3.

HRMS (TOF MS ES<sup>+</sup>): Calcd for  $\text{C}_{21}\text{H}_{15}\text{O}_2$  (M+H) 299.1076. Found 299.1072.

### 3-(3,5-dichlorophenyl)-4H-chromen-4-one (**4aj**).

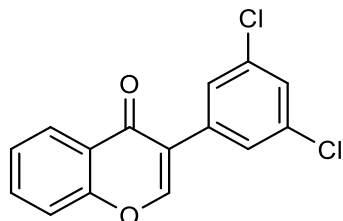

The title compound was prepared by following **protocol A** starting from photocatalyst Eosin Y (19.5 mg, 0.03 mmol, 0.03 equiv.), (E)-3-(dimethylamino)-1-(2-hydroxyphenyl)prop-2-en-1-one **1a** (191 mg, 1.0 mmol, 1.0 equiv.), 3,5-dichlorobenzenediazonium tetrafluoroborate **2j** (338 mg, 1.3 mmol, 1.3 equiv.) and dry DMSO (0.2 mmol/mL).

Purification was accomplished by gradient flash chromatography on silica gel using a mixture of hexane/ethyl acetate 15:1 to 12:1 as eluent to isolate the desired chromone derivative **4aj** (232 mg, 0.80 mmol, 80%).

Alternatively the title compound was prepared by following **protocol B** starting from photocatalyst  $\text{Ru}(\text{bpy})_3\text{Cl}_2 \cdot 6\text{H}_2\text{O}$  (15.0 mg, 0.02 mmol, 0.02 equiv.), (E)-3-(dimethylamino)-1-(2-hydroxyphenyl)prop-2-en-1-one **1a** (191 mg, 1.0 mmol, 1.0 equiv.) and bis(3,5-dichlorophenyl)iodonium

triflate **3j** (852 mg, 1.5 mmol, 1.5 equiv.) and dry CH<sub>3</sub>CN (0.12 mmol/mL). Purification was accomplished by gradient flash chromatography on silica gel using a mixture of hexane/ethyl acetate 15:1 to 12:1 as eluent to isolate the desired chromone derivative **4aj** (215 mg, 0.74 mmol, 74%). Light yellow solid, mp 129-130 °C. <sup>1</sup>H NMR (500 MHz, CDCl<sub>3</sub>): 7.38 (d, 1H, <sup>4</sup>J = 1.9 Hz, CH<sub>Ar</sub>), 7.45 – 7.48 (m, 1H, CH<sub>Ar</sub>), 7.49 (d, 2H, <sup>4</sup>J = 1.8 Hz, CH<sub>Ar</sub>), 7.51 (d, 1H, <sup>3</sup>J = 8.4 Hz, CH<sub>Ar</sub>), 7.71 – 7.74 (m, 1H, CH<sub>Ar</sub>), 8.50 (s, 1H, CH<sub>Ar</sub>), 8.30 (dd, 1H, <sup>3</sup>J = 7.9 Hz, <sup>4</sup>J = 1.5 Hz, CH<sub>Ar</sub>). <sup>13</sup>C NMR (126 MHz, CDCl<sub>3</sub>): δ 118.1, 124.3, 125.7, 126.4, 127.3, 128.3, 134.1, 134.7, 135.0, 153.6, 156.1, 175.6. HRMS (TOF MS ES<sup>+</sup>): Calcd for C<sub>15</sub>H<sub>9</sub>O<sub>2</sub>Cl<sub>2</sub> (M+H) 290.9982. Found 290.9980.

### 3-(4-chlorophenyl)-4H-chromen-4-one (4ar).

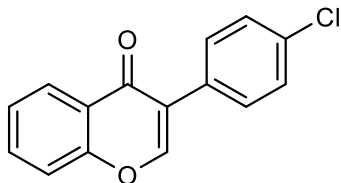

The title compound was prepared by following **protocol A** starting from photocatalyst Eosin Y (19.5 mg, 0.03 mmol, 0.03 equiv.), (E)-3-(dimethylamino)-1-(2-hydroxyphenyl)prop-2-en-1-one **1a** (191 mg, 1.0 mmol, 1.0 equiv.), 4-chlorobenzenediazonium tetrafluoroborate **2r** (294 mg, 1.3 mmol, 1.3 equiv.) and dry DMSO (0.2 mmol/mL).

Purification was accomplished by gradient flash chromatography on silica gel using a mixture of hexane/ethyl acetate 12:1 to 10:1 as eluent to isolate the desired chromone derivative **4ar** (213 mg, 0.83 mmol, 83%).

Alternatively the title compound was prepared by following **protocol B** starting from photocatalyst Ru(bpy)<sub>3</sub>Cl<sub>2</sub>·6H<sub>2</sub>O (15.0 mg, 0.02 mmol, 0.02 equiv.), (E)-3-(dimethylamino)-1-(2-hydroxyphenyl)prop-2-en-1-one **1a** (191 mg, 1.0 mmol, 1.0 equiv.), bis(4-chlorophenyl)iodonium triflate **3r** (748 mg, 1.5 mmol, 1.5 equiv.) and dry CH<sub>3</sub>CN (0.12 mmol/mL). Purification was accomplished by gradient flash chromatography on silica gel using a mixture of hexane/ethyl acetate 12:1 to 10:1 as eluent to isolate the desired chromone derivative **4ar** (203 mg, 0.79 mmol, 79%).

Light brown solid, mp 186-187°C. <sup>1</sup>H NMR (500 MHz, CDCl<sub>3</sub>): δ 7.40 – 7.45 (m, 3H, CH<sub>Ar</sub>), 7.48 – 7.53 (m, 3H, CH<sub>Ar</sub>), 7.68 – 7.71 (m, 1H, CH<sub>Ar</sub>), 8.02 (s, 1H, CH<sub>Ar</sub>), 8.30 (dd, 1H, <sup>3</sup>J = 8.0 Hz, <sup>4</sup>J = 1.6 Hz, CH<sub>Ar</sub>).

<sup>13</sup>C NMR (126 MHz, CDCl<sub>3</sub>): δ 118.1, 124.3, 124.4, 125.4, 126.4, 128.7, 130.1, 130.2, 133.8, 134.2, 153.0, 156.1, 176.0.

HRMS (TOF MS ES<sup>+</sup>): Calcd for C<sub>15</sub>H<sub>10</sub>O<sub>2</sub>Cl (M+H) 257.0376. Found 257.0369.

### 3-(4-phenoxyphenyl)-4H-chromen-4-one (4av).

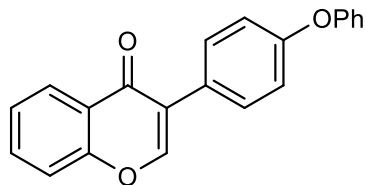

The title compound was prepared by following **protocol A** starting from photocatalyst Eosin Y (19.5 mg, 0.03 mmol, 0.03 equiv.), (E)-3-(dimethylamino)-1-(2-hydroxyphenyl)prop-2-en-1-one **1a** (191 mg, 1.0 mmol, 1.0 equiv.), 4-phenoxybenzenediazonium tetrafluoroborate **2v** (269 mg, 1.3 mmol, 1.3 equiv.) and dry DMSO (0.2 mmol/mL). Purification was accomplished by gradient flash chromatography on silica gel using a mixture of hexane/ethyl

acetate 10:1 to 8:1 as eluent to isolate the desired chromone derivative **4av** (254 mg, 0.81 mmol, 81%).

White solid, mp 158-159 °C.  $^1\text{H}$  NMR (500 MHz,  $\text{CDCl}_3$ ):  $\delta$  7.06 – 7.09 (m, 4H,  $\text{CH}_{\text{Ar}}$ ), 7.11 – 7.15 (m, 1H,  $\text{CH}_{\text{Ar}}$ ), 7.35 (d, 1H,  $^3J = 8.6$  Hz,  $\text{CH}_{\text{Ar}}$ ), 7.37 (d, 1H,  $^3J = 8.6$  Hz,  $\text{CH}_{\text{Ar}}$ ), 7.43 (dt, 1H,  $^3J = 7.9$  Hz,  $^4J = 1.0$  Hz,  $\text{CH}_{\text{Ar}}$ ), 7.49 (d, 1H,  $^3J = 8.4$  Hz,  $\text{CH}_{\text{Ar}}$ ), 7.55 (td, 2H,  $^3J = 8.9$  Hz,  $^4J = 2.2$  Hz,  $\text{CH}_{\text{Ar}}$ ), 7.69 – 7.70 (m, 1H,  $\text{CH}_{\text{Ar}}$ ), 8.03 (s, 1H,  $\text{CH}_{\text{Ar}}$ ), 8.32 (dd, 1H,  $^3J = 7.9$  Hz,  $^4J = 1.4$  Hz,  $\text{CH}_{\text{Ar}}$ ).

$^{13}\text{C}$  NMR (126 MHz,  $\text{CDCl}_3$ ):  $\delta$  118.0, 118.6, 119.2, 123.5, 124.4, 124.7, 125.2, 126.4, 126.6, 129.8, 130.3, 133.6, 156.1, 156.8, 157.4, 176.3.

HRMS (TOF MS ES<sup>+</sup>): Calcd for  $\text{C}_{21}\text{H}_{15}\text{O}_3$  (M+H) 315.1030. Found 315.1021.

#### 6-methyl-3-(p-tolyl)-4H-chromen-4-one (4bb).

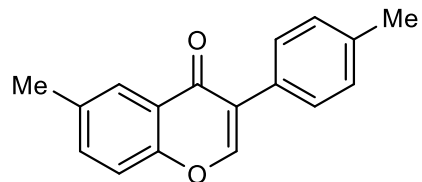

The title compound was prepared by following **protocol A** starting from photocatalyst Eosin Y (19.5 mg, 0.03 mmol, 0.03 equiv.), (E)-3-(dimethylamino)-1-(2-hydroxy-5-methylphenyl)prop-2-en-1-one **1b** (205 mg, 1.0 mmol, 1.0 equiv.), 4-methylbenzenediazonium tetrafluoroborate **2b** (268 mg, 1.3 mmol, 1.3 equiv.) and dry DMSO (0.2 mmol/mL). Purification was accomplished by gradient flash chromatography on silica gel using a

mixture of hexane/ethyl acetate 7:1 to 5:1 as eluent to isolate the desired chromone derivative **4bb** (225 mg, 0.90 mmol, 90%).

White solid, mp 138-139 °C.  $^1\text{H}$  NMR (500 MHz,  $\text{CDCl}_3$ ):  $\delta$  2.47 2.39 (s, 3H, Me), 2.47 (s, 3H, Me), 7.25 (d, 2H,  $^3J = 7.5$  Hz,  $\text{CH}_{\text{Ar}}$ ), 7.36 (d, 1H,  $^3J = 8.1$  Hz,  $\text{CH}_{\text{Ar}}$ ), 7.30 – 7.33 (m, 2H,  $\text{CH}_{\text{Ar}}$ ), 7.45 (d, 2H,  $^3J = 8.1$  Hz,  $\text{CH}_{\text{Ar}}$ ), 7.49 (dd, 1H,  $^3J = 8.8$  Hz,  $^4J = 2.0$  Hz,  $\text{CH}_{\text{Ar}}$ ), 7.98 (s, 1H,  $\text{CH}_{\text{Ar}}$ ), 8.09 (br.s, 1H,  $\text{CH}_{\text{Ar}}$ ).

$^{13}\text{C}$  NMR (126 MHz,  $\text{CDCl}_3$ ):  $\delta$  21.0, 21.2, 117.7, 124.2, 125.1, 125.6, 128.8, 129.0, 129.2, 134.8, 135.1, 137.9, 152.7, 154.4, 176.4.

HRMS (TOF MS ES<sup>+</sup>): Calcd for  $\text{C}_{17}\text{H}_{15}\text{O}_2$  (M+H) 251.1082. Found 251.1072.

#### 6-methyl-3-(o-tolyl)-4H-chromen-4-one (4bc).

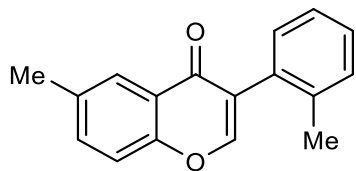

The title compound was prepared by following **protocol A** starting from photocatalyst Eosin Y (19.5 mg, 0.03 mmol, 0.03 equiv.), (E)-3-(dimethylamino)-1-(2-hydroxy-5-methylphenyl)prop-2-en-1-one **1b** (205 mg, 1.0 mmol, 1.0 equiv.), 2-methylbenzenediazonium tetrafluoroborate **2c** (294 mg, 1.3 mmol, 1.3 equiv.) and dry DMSO (0.2 mmol/mL). Purification was accomplished by gradient flash chromatography on silica gel using a mixture of hexane/ethyl acetate 8:1 to 7:1 as eluent to isolate the desired chromone derivative **4bc** (175 mg, 0.70 mmol, 70%).

Alternatively the title compound was prepared by following **protocol B** starting from photocatalyst Ru(bpy)<sub>3</sub>Cl<sub>2</sub>·6H<sub>2</sub>O (15.0 mg, 0.02 mmol, 0.02 equiv.), (E)-3-(dimethylamino)-1-(2-hydroxy-5-methylphenyl)prop-2-en-1-one **1b** (205 mg, 1.0 mmol, 1.0 equiv.), di-*o*-tolylidonium triflate **3c** (687 mg, 1.5 mmol, 1.5 equiv.) and dry CH<sub>3</sub>CN (0.12 mmol/mL). Purification was accomplished by gradient flash chromatography on silica gel using a mixture of hexane/ethyl acetate 8:1 to 7:1 as eluent to isolate the desired chromone derivative **4bc** (152 mg, 0.61 mmol, 61%).

Light brown solid, mp 221-222 °C. <sup>1</sup>H NMR (500 MHz, CDCl<sub>3</sub>): δ 2.27 (s, 3H, Me), 2.49 (s, 3H, Me), 7.19 (d, 1H, <sup>3</sup>J = 7.37 Hz, CH<sub>Ar</sub>), 7.23 – 7.26 (m, 1H, CH<sub>Ar</sub>), 7.30 – 7.33 (m, 2H, CH<sub>Ar</sub>), 7.40 (d, 1H, <sup>3</sup>J = 8.7 Hz, CH<sub>Ar</sub>), 7.50 (dd, 1H, <sup>3</sup>J = 8.6 Hz, <sup>4</sup>J = 2.1 Hz, CH<sub>Ar</sub>), 7.86 (s, 1H, CH<sub>Ar</sub>), 8.10 (br.s, 1H, CH<sub>Ar</sub>).

<sup>13</sup>C NMR (126 MHz, CDCl<sub>3</sub>): δ 19.9, 20.8, 117.8, 123.9, 125.5, 125.7, 126.1, 128.5, 130.1, 130.4, 131.7, 134.8, 135.1, 138.0, 153.4, 154.6, 175.9.

HRMS (TOF MS ES<sup>+</sup>): Calcd for C<sub>17</sub>H<sub>15</sub>O<sub>2</sub> (M+H) 251.1074. Found 251.1072.

### 3-(4-(tert-butyl)phenyl)-6-methyl-4H-chromen-4-one (**4bd**).

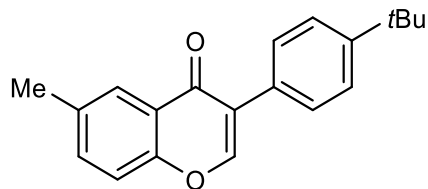

The title compound was prepared by following **protocol A** starting from photocatalyst Eosin Y (19.5 mg, 0.03 mmol, 0.03 equiv.), (E)-3-(dimethylamino)-1-(2-hydroxy-5-methylphenyl)prop-2-en-1-one **1b** (205 mg, 1.0 mmol, 1.0 equiv.), 4-(tert-butyl)benzenediazonium tetrafluoroborate **2d** (322 mg, 1.3 mmol, 1.3 equiv.) and dry DMSO (0.2 mmol/mL). Purification was accomplished by gradient flash chromatography on silica gel using

a mixture of hexane/ethyl acetate 8:1 to 7:1 as eluent to isolate the desired chromone derivative **4bd** (239 mg, 0.82 mmol, 82%).

White solid, mp 133-134 °C. <sup>1</sup>H NMR (500 MHz, CDCl<sub>3</sub>): δ 1.36 (s, 9H, *t*Bu), 2.48 (s, 3H, Me), 7.37 (d, 1H, <sup>3</sup>J = 8.6 Hz, CH<sub>Ar</sub>), 7.46 – 7.50 (m, 3H, CH<sub>Ar</sub>), 7.51 – 7.53 (m, 2H, CH<sub>Ar</sub>), 8.02 (s, 1H, CH<sub>Ar</sub>), 8.11 (br s, 1H, CH<sub>Ar</sub>).

<sup>13</sup>C NMR (126 MHz, CDCl<sub>3</sub>): δ 21.0, 31.3, 34.6, 117.7, 124.2, 125.0, 125.5, 125.7, 128.6, 129.0, 134.8, 135.1, 151.0, 152.9, 154.4, 176.4.

HRMS (TOF MS ES<sup>+</sup>): Calcd for C<sub>20</sub>H<sub>21</sub>O<sub>2</sub> (M+H) 293.1547. Found 293.1542.



**6-methyl-3-(4-phenoxyphenyl)-4H-chromen-4-one (4be).**

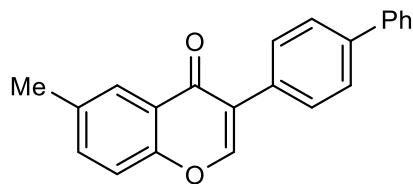

The title compound was prepared by following **protocol A** starting from photocatalyst Eosin Y (19.5 mg, 0.03 mmol, 0.03 equiv.), (E)-3-(dimethylamino)-1-(2-hydroxy-5-methylphenyl)prop-2-en-1-one **1b** (205 mg, 1.0 mmol, 1.0 equiv.), [1,1'-biphenyl]-4-diazonium tetrafluoroborate **2e** (348 mg, 1.3 mmol, 1.3 equiv.) and dry DMSO (0.2 mmol/mL). Purification was accomplished by gradient flash chromatography on silica gel using a mixture of hexane/ethyl acetate 4:1 to 2:1 as eluent to isolate the desired chromone derivative **4be** (287 mg, 0.92 mmol, 92%).

Alternatively the title compound was prepared by following **protocol B** starting from photocatalyst Ru(bpy)<sub>3</sub>Cl<sub>2</sub>·6H<sub>2</sub>O (15.0 mg, 0.02 mmol, 0.02 equiv.), (E)-3-(dimethylamino)-1-(2-hydroxy-5-methylphenyl)prop-2-en-1-one **1b** (205 mg, 1.0 mmol, 1.0 equiv.), di([1,1'-biphenyl]-4-yl)iodonium triflate **3e** (873 mg, 1.5 mmol, 1.5 equiv.) and dry CH<sub>3</sub>CN (0.12 mmol/mL). Purification was accomplished by gradient flash chromatography on silica gel using a mixture of hexane/ethyl acetate 4:1 to 2:1 as eluent to isolate the desired chromone derivative **4be** (262 mg, 0.84 mmol, 84%).

Yellow solid, mp 182-183 °C. <sup>1</sup>H NMR (500 MHz, CDCl<sub>3</sub>): δ 2.49 (s, 3H, Me), 7.35 – 7.38 (m, 1H, CH<sub>Ar</sub>), 7.40 (d, 1H, <sup>3</sup>J = 8.6 Hz, CH<sub>Ar</sub>), 7.45 – 7.48 (m, 2H, CH<sub>Ar</sub>), 7.51 (dd, 1H, <sup>3</sup>J = 8.6 Hz, <sup>4</sup>J = 2.0 Hz, CH<sub>Ar</sub>), 7.62 – 7.69 (m, 6H, CH<sub>Ar</sub>), 8.07 (s, 1H, CH<sub>Ar</sub>), 8.12 (d, 1H, <sup>4</sup>J = 0.9 Hz, CH<sub>Ar</sub>).

<sup>13</sup>C NMR (126 MHz, CDCl<sub>3</sub>): δ 21.0, 117.8, 118.7, 119.2, 123.5, 124.2, 124.6, 125.7, 126.8, 129.8, 130.4, 134.9, 135.2, 152.7, 154.5, 156.9, 157.4, 176.4.

HRMS (TOF MS ES<sup>+</sup>): Calcd for C<sub>22</sub>H<sub>17</sub>O<sub>2</sub> (M+H) 313.1235. Found 313.1229.

**6-methyl-3-(naphthalen-1-yl)-4H-chromen-4-one (4bg).**

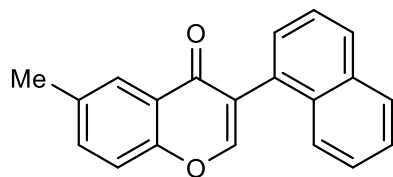

The title compound was prepared by following **protocol A** starting from photocatalyst Eosin Y (19.5 mg, 0.03 mmol, 0.03 equiv.), (E)-3-(dimethylamino)-1-(2-hydroxy-5-methylphenyl)prop-2-en-1-one **1b** (205 mg, 1.0 mmol, 1.0 equiv.), naphthalene-1-diazonium tetrafluoroborate **2g** (315 mg, 1.3 mmol, 1.3 equiv.) and dry DMSO (0.2 mmol/mL). Purification was accomplished by gradient flash chromatography on silica gel using a mixture of hexane/ethyl acetate 12:1 to 10:1 as eluent to isolate the desired chromone derivative **4bg** (226 mg, 0.79 mmol, 79%).

Alternatively the title compound was prepared by following **protocol B** starting from photocatalyst Ru(bpy)<sub>3</sub>Cl<sub>2</sub>·6H<sub>2</sub>O (15.0 mg, 0.02 mmol, 0.02 equiv.), (E)-3-(dimethylamino)-1-(2-hydroxy-5-methylphenyl)prop-2-en-1-one **1b** (205 mg, 1.0 mmol, 1.0 equiv.), di(naphthalen-1-yl)iodonium

triflate **3g** (795 mg, 1.5 mmol, 1.5 equiv.) and dry CH<sub>3</sub>CN (0.12 mmol/mL). Purification was accomplished by gradient flash chromatography on silica gel using a mixture of hexane/ethyl acetate 12:1 to 10:1 as eluent to isolate the desired chromone derivative **4bg** (180 mg, 0.63 mmol, 63%). This compound (171 mg, 0.60 mmol, 60%) can be prepared following the same protocol starting from di(naphthalen-1-yl)iodonium hexafluorophosphate (789 mg, 1.5 mmol, 1.5 equiv.).

Light greenish, mp 120-121 °C. <sup>1</sup>H NMR (500 MHz, CDCl<sub>3</sub>): δ 2.50 (s, 3H, Me), 7.43 – 7.48 (m, 3H, CH<sub>Ar</sub>), 7.51 – 7.55 (m, 3H, CH<sub>Ar</sub>), 7.76 (d, 1H, <sup>3</sup>J = 8.2 Hz, CH<sub>Ar</sub>), 7.92 (t, 2H, <sup>3</sup>J = 8.5 Hz, CH<sub>Ar</sub>), 8.00 (s, 1H, CH<sub>Ar</sub>), 8.16 (br. s, 1H, CH<sub>Ar</sub>).

<sup>13</sup>C NMR (126 MHz, CDCl<sub>3</sub>): δ 20.9, 117.8, 123.9, 125.0, 125.2, 125.3, 125.5, 125.6, 125.8, 126.2, 128.1, 128.3, 129.9, 132.3, 133.5, 134.9, 135.2, 154.0, 154.6, 176.5.

HRMS (TOF MS ES<sup>+</sup>): Calcd for C<sub>20</sub>H<sub>15</sub>O<sub>2</sub> (M+H) 287.1080. Found 287.1072.

### **3-(6-methyl-4-oxo-4H-chromen-3-yl)benzonitrile (4bu).**

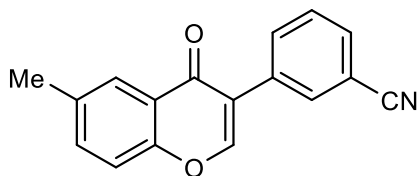

The title compound was prepared by following **protocol A** starting from photocatalyst Eosin Y (19.5 mg, 0.03 mmol, 0.03 equiv.), (E)-3-(dimethylamino)-1-(2-hydroxy-5-methylphenyl)prop-2-en-1-one **1b** (205 mg, 1.0 mmol, 1.0 equiv.), 3-cyanobenzenediazonium tetrafluoroborate **2u** (282 mg, 1.3 mmol, 1.3 equiv.) and dry DMSO (0.2 mmol/mL). Purification was accomplished by gradient flash chromatography on silica gel using a mixture of hexane/ethyl acetate 10:1 to 8:1 as eluent to isolate the desired chromone derivative **4bu** (201 mg, 0.77 mmol, 77%).

Alternatively the title compound was prepared by following **protocol B** starting from photocatalyst Ru(bpy)<sub>3</sub>Cl<sub>2</sub>·6H<sub>2</sub>O (15.0 mg, 0.02 mmol, 0.02 equiv.), (E)-3-(dimethylamino)-1-(2-hydroxy-5-methylphenyl)prop-2-en-1-one **1b** (205 mg, 1.0 mmol, 1.0 equiv.), bis(3-cyanophenyl)iodonium triflate **3u** (720 mg, 1.5 mmol, 1.5 equiv.) and dry CH<sub>3</sub>CN (0.12 mmol/mL). Purification was accomplished by gradient flash chromatography on silica gel using a mixture of hexane/ethyl acetate 10:1 to 8:1 as eluent to isolate the desired chromone derivative **4bu** (185 mg, 0.71 mmol, 71%). White solid, mp 191 °C. <sup>1</sup>H NMR (500 MHz, CDCl<sub>3</sub>): δ 2.49 (s, 3H, Me), 7.41 (d, 1H, <sup>3</sup>J = 8.1 Hz, CH<sub>Ar</sub>), 7.52 – 7.54 (m, 1H, CH<sub>Ar</sub>), 7.55 (d, 1H, <sup>3</sup>J = 7.8 Hz, CH<sub>Ar</sub>), 7.65 (dt, 1H, <sup>3</sup>J = 7.3 Hz, <sup>4</sup>J = 1.3 Hz, CH<sub>Ar</sub>), 7.83 (dt, 1H, <sup>3</sup>J = 7.7 Hz, <sup>4</sup>J = 1.3 Hz, CH<sub>Ar</sub>), 7.88 – 7.89 (m, 1H, CH<sub>Ar</sub>), 8.04 (s, 1H, CH<sub>Ar</sub>), 8.07 (d, 1H, <sup>4</sup>J = 1.0 Hz, CH<sub>Ar</sub>).

<sup>13</sup>C NMR (126 MHz, CDCl<sub>3</sub>): δ 21.0, 112.7, 117.9, 118.6, 123.3, 124.0, 125.6, 129.3, 131.6, 132.4, 133.3, 133.4, 135.4, 135.8, 153.4, 154.5, 175.7.

HRMS (TOF MS ES<sup>+</sup>): Calcd for C<sub>17</sub>H<sub>12</sub>NO<sub>2</sub> (M+H) 262.0868. Found 262.0868.

**7-methoxy-3-(4-(trifluoromethoxy)phenyl)-4H-chromen-4-one (4ch).**

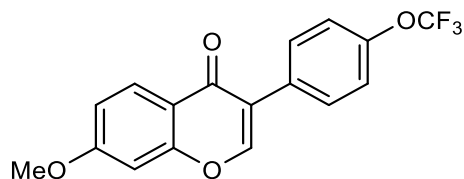

The title compound was prepared by following **protocol A** starting from photocatalyst Eosin Y (19.5 mg, 0.03 mmol, 0.03 equiv.), (E)-3-(dimethylamino)-1-(2-hydroxy-4-methoxyphenyl)prop-2-en-1-one **1c** (221 mg, 1.0 mmol, 1.0 equiv.), 4-(trifluoromethoxy)benzenediazonium tetrafluoroborate **2h** (359 mg, 1.3 mmol, 1.3 equiv.) and dry DMSO (0.2 mmol/mL). Purification was accomplished by gradient flash chromatography on silica gel using a mixture of hexane/ethyl acetate 5:1 to 1:1 as eluent to isolate the desired chromone derivative **4ch** (292 mg, 0.87 mmol, 87%).

Alternatively the title compound was prepared by following **protocol B** starting from photocatalyst Ru(bpy)<sub>3</sub>Cl<sub>2</sub>·6H<sub>2</sub>O (15.0 mg, 0.02 mmol, 0.02 equiv.), (E)-3-(dimethylamino)-1-(2-hydroxy-4-methoxyphenyl)prop-2-en-1-one **1c** (221 mg, 1.0 mmol, 1.0 equiv.), bis(4-(trifluoromethoxy)phenyl)iodonium triflate **3h** (897 mg, 1.5 mmol, 1.5 equiv.) and dry CH<sub>3</sub>CN (0.12 mmol/mL). Purification was accomplished by gradient flash chromatography on silica gel using a mixture of hexane/ethyl acetate 5:1 to 1:1 as eluent to isolate the desired chromone derivative **4ch** (276 mg, 0.82 mmol, 82%).

Light yellow solid, mp 149-150 °C. <sup>1</sup>H NMR (500 MHz, CDCl<sub>3</sub>): δ 3.92 (s, 3H, OMe), 6.86 (d, 1H, <sup>4</sup>J = 2.4 Hz, CH<sub>Ar</sub>), 7.00 (dd, 1H, <sup>3</sup>J = 8.7 Hz, <sup>4</sup>J = 2.4 Hz, CH<sub>Ar</sub>), 7.27 (d, 2H, <sup>3</sup>J = 8.3 Hz, CH<sub>Ar</sub>), 7.59 (d, 2H, <sup>3</sup>J = 9.0 Hz, CH<sub>Ar</sub>), 7.95 (s, 1H, CH<sub>Ar</sub>), 7.59 (d, 1H, <sup>3</sup>J = 8.7 Hz, CH<sub>Ar</sub>).

<sup>13</sup>C NMR (126 MHz, CDCl<sub>3</sub>): δ 55.9, 100.2, 114.8, 118.3, 120.4 (d, <sup>1</sup>J<sub>CF</sub> = 253.3 Hz), 121.1, 124.1, 127.8, 130.4, 130.7, 149.1, 152.7, 158.0, 164.2, 175.4.

HRMS (TOF MS ES<sup>+</sup>): Calcd for C<sub>17</sub>H<sub>12</sub>O<sub>4</sub>F<sub>3</sub> (M+H) 337.0703. Found 337.0699.

**7-methoxy-3-(3-(trifluoromethyl)phenyl)-4H-chromen-4-one (4ci).**

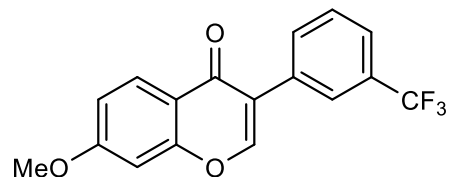

The title compound was prepared by following **protocol A** starting from photocatalyst Eosin Y (19.5 mg, 0.03 mmol, 0.03 equiv.), (E)-3-(dimethylamino)-1-(2-hydroxy-4-methoxyphenyl)prop-2-en-1-one **1c** (221 mg, 1.0 mmol, 1.0 equiv.), 3-(trifluoromethyl)benzenediazonium tetrafluoroborate **2i** (338 mg, 1.3 mmol, 1.3 equiv.) and dry DMSO (0.2 mmol/mL). Purification was accomplished by gradient flash chromatography

on silica gel using a mixture of hexane/ethyl acetate 7:1 to 3:1 as eluent to isolate the desired chromone derivative **4ci** (256 mg, 0.83 mmol, 83%). Alternatively the title compound was prepared by following **protocol B** starting from photocatalyst Ru(bpy)<sub>3</sub>Cl<sub>2</sub>·6H<sub>2</sub>O (15.0 mg, 0.02 mmol, 0.02 equiv.), (E)-3-(dimethylamino)-1-(2-hydroxy-4-methoxyphenyl)prop-2-en-1-one **1c** (221 mg, 1.0 mmol, 1.0 equiv.), bis(3-(trifluoromethyl)phenyl)iodonium triflate **3i** (849 mg, 1.5 mmol, 1.5 equiv.) and dry CH<sub>3</sub>CN (0.12 mmol/mL). Purification was accomplished by gradient flash chromatography on silica gel using a mixture of hexane/ethyl acetate 7:1 to 3:1 as eluent to isolate the desired chromone derivative **4ci** (246 mg, 0.77 mmol, 77%). This compound (243 mg, 0.76 mmol, 76 %) can be prepared following the same protocol starting from bis(3-(trifluoromethyl)phenyl)iodonium hexafluorophosphate (843 mg, 1.5 mmol, 1.5 equiv.).

White solid, mp 124 - 125 °C. <sup>1</sup>H NMR (500 MHz, CDCl<sub>3</sub>): δ 3.92 (s, 3H, OMe), 6.87 (d, 1H, <sup>4</sup>J = 2.3 Hz, CH<sub>Ar</sub>), 7.01 (dd, 1H, <sup>3</sup>J = 8.9 Hz, <sup>4</sup>J = 2.3 Hz, CH<sub>Ar</sub>), 7.55 (t, 1H, <sup>3</sup>J = 7.7 Hz, CH<sub>Ar</sub>), 7.63 (d, 1H, <sup>3</sup>J = 7.7 Hz, CH<sub>Ar</sub>), 7.77 (d, 1H, <sup>3</sup>J = 7.7 Hz, CH<sub>Ar</sub>), 7.82 (s, 1H, CH<sub>Ar</sub>), 7.99 (s, 1H, CH<sub>Ar</sub>), 8.20 (d, 1H, <sup>3</sup>J = 8.8 Hz, CH<sub>Ar</sub>).

<sup>13</sup>C NMR (126 MHz, CDCl<sub>3</sub>): δ 55.9, 100.2, 118.2, 124.0 (q, <sup>1</sup>J<sub>CF</sub> = 273.3 Hz, CF<sub>3</sub>), 124.1, 124.8 (m), 125.6 (m), 127.7, 128.9, 130.9 (q, <sup>2</sup>J<sub>CF</sub> = 32.0 Hz, CCF<sub>3</sub>), 132.3, 132.8, 152.9, 158.0, 164.3, 175.2.

HRMS (TOF MS ES<sup>+</sup>): Calcd for C<sub>17</sub>H<sub>12</sub>O<sub>3</sub>F<sub>3</sub> (M+H) 321.0746. Found 321.0739.

### 3-(4-fluorophenyl)-7-methoxy-4H-chromen-4-one (**4cp**).

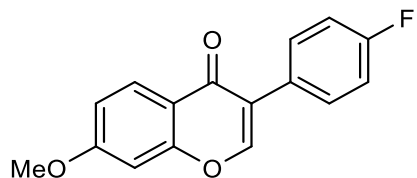

The title compound was prepared by following **protocol A** starting from photocatalyst Eosin Y (19.5 mg, 0.03 mmol, 0.03 equiv.), (E)-3-(dimethylamino)-1-(2-hydroxy-4-methoxyphenyl)prop-2-en-1-one **1c** (221 mg, 1.0 mmol, 1.0 equiv.), 4-fluorobenzenediazonium tetrafluoroborate **2p** (273 mg, 1.3 mmol, 1.3 equiv.) and dry DMSO (0.2 mmol/mL). Purification was accomplished by gradient flash chromatography on silica gel using a

mixture of hexane/ethyl acetate 5:1 to 3:1 as eluent to isolate the desired chromone derivative **4cp** (232 mg, 0.86 mmol, 86%).

Alternatively the title compound was prepared by following **protocol B** starting from photocatalyst Ru(bpy)<sub>3</sub>Cl<sub>2</sub>·6H<sub>2</sub>O (15.0 mg, 0.02 mmol, 0.02 equiv.), (E)-3-(dimethylamino)-1-(2-hydroxy-4-methoxyphenyl)prop-2-en-1-one **1c** (221 mg, 1.0 mmol, 1.0 equiv.), bis(4-fluorophenyl)iodonium triflate **3p** (699 mg, 1.5 mmol, 1.5 equiv.) and dry CH<sub>3</sub>CN (0.12 mmol/mL). Purification was accomplished by gradient flash chromatography on silica gel using a mixture of hexane/ethyl acetate 5:1 to 3:1 as eluent to isolate the desired chromone derivative **4cp** (216 mg, 0.80 mmol, 80%). This compound (224 mg, 0.83 mmol, 83 %) can be prepared following the same protocol starting from bis(4-fluorophenyl)iodonium hexafluorophosphate (693 mg, 1.5 mmol, 1.5 equiv.).

Yellow solid, mp 138 - 139 °C. <sup>1</sup>H NMR (500 MHz, CDCl<sub>3</sub>): δ 3.91 (s, 3H, OMe), 6.85 (d, 1H, <sup>4</sup>J = 2.4 Hz, CH<sub>Ar</sub>), 7.01 (dd, 1H, <sup>3</sup>J = 8.9 Hz, <sup>4</sup>J = 2.3 Hz, CH<sub>Ar</sub>), 7.05 – 7.09 (m, 1H, CH<sub>Ar</sub>), 7.31 – 7.39 (m, 3H, CH<sub>Ar</sub>), 7.96 (s, 1H, CH<sub>Ar</sub>), 8.20 (d, 1H, <sup>3</sup>J = 8.7 Hz, CH<sub>Ar</sub>).

<sup>13</sup>C NMR (126 MHz, CDCl<sub>3</sub>): δ 55.9, 100.1, 114.8, 115.0 (d, *J*<sub>CF</sub> = 20.8 Hz), 116.0 (d, *J*<sub>CF</sub> = 20.8 Hz), 118.3, 124.1 (m), 124.4 (d, *J*<sub>CF</sub> = 2.9 Hz), 127.8, 129.9 (d, *J*<sub>CF</sub> = 8.3 Hz), 134.0 (d, *J*<sub>CF</sub> = 8.6 Hz), 152.8, 157.9, 162.7 (d, <sup>1</sup>*J*<sub>CF</sub> = 245.0 Hz, CF), 164.1, 175.2.

HRMS (TOF MS ES<sup>+</sup>): Calcd for C<sub>16</sub>H<sub>12</sub>O<sub>3</sub>F (M+H) 271.0772. Found 271.0770.

#### 6-fluoro-3-(p-tolyl)-4H-chromen-4-one (**4db**).

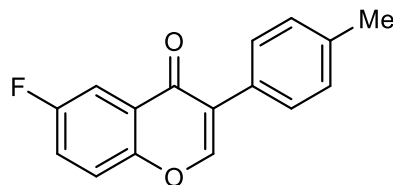

The title compound was prepared by following **protocol A** starting from photocatalyst Eosin Y (19.5 mg, 0.03 mmol, 0.03 equiv.), (E)-3-(dimethylamino)-1-(5-fluoro-2-hydroxyphenyl)prop-2-en-1-one **1d** (209 mg, 1.0 mmol, 1.0 equiv.), 4-methylbenzenediazonium tetrafluoroborate **2b** (268 mg, 1.3 mmol, 1.3 equiv.) and dry DMSO (0.2 mmol/mL). Purification was accomplished by gradient flash chromatography on silica gel using a mixture of hexane/ethyl acetate 7:1 to 5:1 as eluent to isolate the desired chromone derivative **4db** (206 mg, 0.81 mmol, 81%).

Alternatively the title compound was prepared by following **protocol B** starting from photocatalyst Ru(bpy)<sub>3</sub>Cl<sub>2</sub>·6H<sub>2</sub>O (15.0 mg, 0.02 mmol, 0.02 equiv.), (E)-3-(dimethylamino)-1-(5-fluoro-2-hydroxyphenyl)prop-2-en-1-one **1d** (209 mg, 1.0 mmol, 1.0 equiv.), di-p-tolylidonium triflate **3b** (687 mg, 1.5 mmol, 1.5 equiv.) and dry CH<sub>3</sub>CN (0.12 mmol/mL). Purification was accomplished by gradient flash chromatography on silica gel using a mixture of hexane/ethyl acetate 7:1 to 5:1 as eluent to isolate the desired chromone derivative **4db** (185 mg, 0.73 mmol, 73%). This compound (180 mg, 0.71 mmol, 71 %) can be prepared following the same protocol starting from di-p-tolylidonium hexafluorophosphate (681 mg, 1.5 mmol, 1.5 equiv.).

White solid, mp 160-161 °C.  $^1\text{H}$  NMR (500 MHz,  $\text{CDCl}_3$ ):  $\delta$  2.41 (s, 3H, Me), 7.27 (d, 2H,  $^3J = 8.0$  Hz,  $\text{CH}_{\text{Ar}}$ ), 7.39 – 7.43 (m, 1H,  $\text{CH}_{\text{Ar}}$ ), 7.46 – 7.51 (m, 3H,  $\text{CH}_{\text{Ar}}$ ), 7.95 (dd, 1H,  $^3J = 8.3$  Hz,  $^4J = 3.1$  Hz,  $\text{CH}_{\text{Ar}}$ ), 8.02 (s, 1H,  $\text{CH}_{\text{Ar}}$ ).

$^{13}\text{C}$  NMR (126 MHz,  $\text{CDCl}_3$ ):  $\delta$  21.2, 111.1 (d,  $J_{\text{CF}} = 24.0$  Hz), 120.1 (d,  $J_{\text{CF}} = 8.1$  Hz), 121.7 (d,  $J_{\text{CF}} = 25.3$  Hz), 124.5, 125.5 (d,  $J_{\text{CF}} = 7.0$  Hz), 128.4, 128.7, 129.2, 138.2, 152.3, 152.9, 159.5 (d,  $^1J_{\text{CF}} = 252.0$  Hz), 175.5.

HRMS (TOF MS ES<sup>+</sup>): Calcd for  $\text{C}_{61}\text{H}_{12}\text{O}_2\text{F}$  (M+H) 255.0822. Found 255.0821.

### 3-(4-ethoxyphenyl)-6-fluoro-4H-chromen-4-one (4dl).

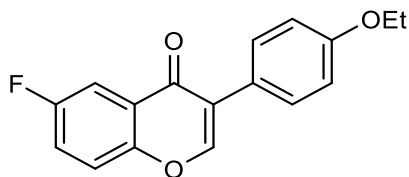

The title compound was prepared by following **protocol A** starting from photocatalyst Eosin Y (19.5 mg, 0.03 mmol, 0.03 equiv.), (E)-3-(dimethylamino)-1-(5-fluoro-2-hydroxyphenyl)prop-2-en-1-one **1d** (209 mg, 1.0 mmol, 1.0 equiv.), 4-ethoxybenzenediazonium tetrafluoroborate **2l** (307 mg, 1.3 mmol, 1.3 equiv.) and dry DMSO (0.2 mmol/mL). Purification was accomplished by gradient flash chromatography on silica gel using a mixture of

hexane/ethyl acetate 5:1 to 3:1 as eluent to isolate the desired chromone derivative **4dl** (227 mg, 0.80 mmol, 80%).

Alternatively the title compound was prepared by following **protocol B** starting from photocatalyst  $\text{Ru}(\text{bpy})_3\text{Cl}_2 \cdot 6\text{H}_2\text{O}$  (15.0 mg, 0.02 mmol, 0.02 equiv.), (E)-3-(dimethylamino)-1-(5-fluoro-2-hydroxyphenyl)prop-2-en-1-one **1d** (209 mg, 1.0 mmol, 1.0 equiv.), bis(4-ethoxyphenyl)iodonium triflate **3l** (777 mg, 1.5 mmol, 1.5 equiv.) and dry  $\text{CH}_3\text{CN}$  (0.12 mmol/mL). Purification was accomplished by gradient flash chromatography on silica gel using a mixture of hexane/ethyl acetate 5:1 to 3:1 as eluent to isolate the desired chromone derivative **4dl** (224 mg, 0.79 mmol, 79%).

White solid, mp 163-164 °C.  $^1\text{H}$  NMR (500 MHz,  $\text{CDCl}_3$ ):  $\delta$  1.43 (t, 3H,  $^3J = 6.7$  Hz,  $\text{OCH}_2\text{CH}_3$ ), 4.06 (q, 2H,  $^3J = 6.7$  Hz,  $\text{OCH}_2\text{CH}_3$ ), 6.96 (d, 2H,  $^3J = 8.9$  Hz,  $\text{CH}_{\text{Ar}}$ ), 7.37 – 7.42 (m, 1H,  $\text{CH}_{\text{Ar}}$ ), 7.47 – 7.50 (m, 3H,  $\text{CH}_{\text{Ar}}$ ), 7.93 (dd, 1H,  $^3J = 8.3$  Hz,  $^4J = 3.0$  Hz,  $\text{CH}_{\text{Ar}}$ ), 8.00 (s, 1H,  $\text{CH}_{\text{Ar}}$ ).

$^{13}\text{C}$  NMR (126 MHz,  $\text{CDCl}_3$ ):  $\delta$  14.8, 63.5, 111.1 (d,  $J_{\text{CF}} = 22.0$  Hz), 120.11 (d,  $J_{\text{CF}} = 7.8$  Hz), 121.7 (d,  $J_{\text{CF}} = 25.9$  Hz), 123.5, 124.4, 125.5 (d,  $J_{\text{CF}} = 7.6$  Hz), 130.0, 152.4, 152.7, 159.1, 159.5 (d,  $^1J_{\text{CF}} = 249.5$  Hz), 160.7, 175.7.

HRMS (TOF MS ES<sup>+</sup>): Calcd for  $\text{C}_{17}\text{H}_{14}\text{O}_3\text{F}$  (M+H) 285.0931. Found 285.0927.

### 6-fluoro-3-(3-methoxyphenyl)-4H-chromen-4-one (4dm).

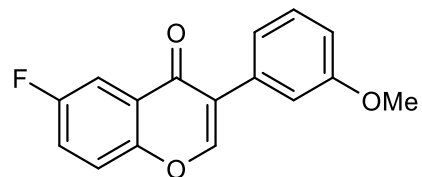

The title compound was prepared by following **protocol A** starting from photocatalyst Eosin Y (19.5 mg, 0.03 mmol, 0.03 equiv.), (E)-3-(dimethylamino)-1-(5-fluoro-2-hydroxyphenyl)prop-2-en-1-one **1d** (209 mg, 1.0 mmol, 1.0 equiv.), 3-methoxybenzenediazonium tetrafluoroborate **2m** (288 mg, 1.3 mmol, 1.3 equiv.) and dry DMSO (0.2 mmol/mL). Purification was accomplished by gradient flash chromatography on silica gel using a

mixture of hexane/ethyl acetate 5:1 to 3:1 as eluent to isolate the desired chromone derivative **4dm** (210 mg, 0.78 mmol, 78%).

Alternatively the title compound was prepared by following **protocol B** starting from photocatalyst Ru(bpy)<sub>3</sub>Cl<sub>2</sub>·6H<sub>2</sub>O (15.0 mg, 0.02 mmol, 0.02 equiv.), (E)-3-(dimethylamino)-1-(5-fluoro-2-hydroxyphenyl)prop-2-en-1-one **1d** (209 mg, 1.0 mmol, 1.0 equiv.), bis(3-methoxyphenyl)iodonium triflate **3m** (735 mg, 1.5 mmol, 1.5 equiv.) and dry CH<sub>3</sub>CN (0.12 mmol/mL). Purification was accomplished by gradient flash chromatography on silica gel using a mixture of hexane/ethyl acetate 5:1 to 3:1 as eluent to isolate the desired chromone derivative **4dm** (192 mg, 0.71 mmol, 71%).

White solid, mp 133-134 °C. <sup>1</sup>H NMR (500 MHz, CDCl<sub>3</sub>): δ 3.83 (s 3H, OMe), 6.91 (dd, 1H, <sup>3</sup>J = 8.4 Hz, <sup>4</sup>J = 2.1 Hz, CH<sub>Ar</sub>), 7.09 (d, 1H, <sup>3</sup>J = 7.7 Hz, CH<sub>Ar</sub>), 7.13 – 7.14 (m, 1H, CH<sub>Ar</sub>), 7.33 (d, 1H, <sup>3</sup>J = 8.0 Hz, CH<sub>Ar</sub>), 7.37 – 7.41 (m, 1H, CH<sub>Ar</sub>), 7.46 – 7.49 (m, 1H, CH<sub>Ar</sub>), 7.91 (dd, 1H, <sup>3</sup>J = 8.5 Hz, <sup>4</sup>J = 3.0 Hz, CH<sub>Ar</sub>), 8.02 (s, 1H, CH<sub>Ar</sub>).

<sup>13</sup>C NMR (126 MHz, CDCl<sub>3</sub>): δ 55.2, 111.0 (d, *J*<sub>CF</sub> = 23.5 Hz), 114.2 (d, *J*<sub>CF</sub> = 48.8 Hz), 120.1 (d, *J*<sub>CF</sub> = 7.9 Hz), 121.0, 121.6 (d, *J*<sub>CF</sub> = 25.1 Hz), 124.4, 125.5 (d, *J*<sub>CF</sub> = 7.2 Hz), 129.5, 132.7, 152.3, 153.3, 159.5, 159.52 (d, <sup>1</sup>*J*<sub>CF</sub> = 244.6 Hz), 175.3.

HRMS (TOF MS ES<sup>+</sup>): Calcd for C<sub>16</sub>H<sub>12</sub>O<sub>3</sub>F (M+H) 271.0778. Found 271.0770.

### 3-(3,4-dimethoxyphenyl)-6-fluoro-4H-chromen-4-one (4dn).

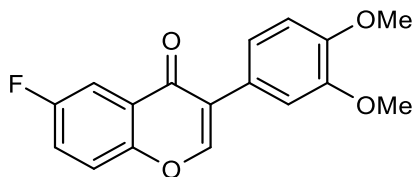

The title compound was prepared by following **protocol A** starting from photocatalyst Eosin Y (19.5 mg, 0.03 mmol, 0.03 equiv.), (E)-3-(dimethylamino)-1-(5-fluoro-2-hydroxyphenyl)prop-2-en-1-one **1d** (209 mg, 1.0 mmol, 1.0 equiv.), 3,4-dimethoxybenzenediazonium tetrafluoroborate **2n** (327 mg, 1.3 mmol, 1.3 equiv.) and dry DMSO (0.2 mmol/mL). Purification was accomplished by gradient flash chromatography on silica gel using

a mixture of hexane/ethyl acetate 3:1 to pure ethyl acetate as eluent to isolate the desired chromone derivative **4dn** (264 mg, 0.88 mmol, 88%).

Light brown solid, mp 152 - 153 °C.  $^1\text{H}$  NMR (500 MHz,  $\text{CDCl}_3$ ):  $\delta$  3.91 (s, 3H, OMe), 3.93 (s, 3H, OMe), 6.92 (d, 1H,  $^3J = 8.4$  Hz,  $\text{CH}_{\text{Ar}}$ ), 7.05 (dd, 1H,  $^3J = 8.4$  Hz,  $^4J = 1.9$  Hz,  $\text{CH}_{\text{Ar}}$ ), 7.18 (d, 1H,  $^4J = 2.0$  Hz,  $\text{CH}_{\text{Ar}}$ ), 7.39 – 7.43 (m, 1H,  $\text{CH}_{\text{Ar}}$ ), 7.48 – 7.51 (m, 1H,  $\text{CH}_{\text{Ar}}$ ), 7.93 (dd, 1H,  $^3J = 8.3$  Hz,  $^4J = 3.0$  Hz,  $\text{CH}_{\text{Ar}}$ ), 8.03 (s, 1H,  $\text{CH}_{\text{Ar}}$ ).

$^{13}\text{C}$  NMR (126 MHz,  $\text{CDCl}_3$ ):  $\delta$  55.92, 55.93, 111.0 (d,  $J_{\text{CF}} = 24.5$  Hz), 111.2, 112.3, 120.1 (d,  $J_{\text{CF}} = 8.0$  Hz), 121.0, 121.8 (d,  $J_{\text{CF}} = 25.6$  Hz), 124.1, 124.4, 125.5 (d,  $J_{\text{CF}} = 7.7$  Hz), 148.8, 149.2, 152.4, 152.9, 159.6 (d,  $^1J_{\text{CF}} = 248.8$  Hz), 175.7.

HRMS (TOF MS ES<sup>+</sup>): Calcd for  $\text{C}_{17}\text{H}_{14}\text{O}_4\text{F}$  (M+H) 301.0874. Found 301.0876.

### 3-([1,1'-biphenyl]-3-yl)-7-fluoro-4H-chromen-4-one (4ef).

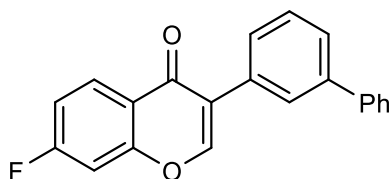

The title compound was prepared by following **protocol A** starting from photocatalyst Eosin Y (19.5 mg, 0.03 mmol, 0.03 equiv.), (E)-3-(dimethylamino)-1-(4-fluoro-2-hydroxyphenyl)prop-2-en-1-one **1e** (209 mg, 1.0 mmol, 1.0 equiv.), [1,1'-biphenyl]-3-diazonium tetrafluoroborate **2f** (348 mg, 1.3 mmol, 1.3 equiv.) and dry DMSO (0.2 mmol/mL). Purification was accomplished by gradient flash chromatography on silica gel using a mixture of

hexane/ethyl acetate 7:1 to 3:1 as eluent to isolate the desired chromone derivative **4ef** (287 mg, 0.91 mmol, 91%).

White solid, mp 131-132 °C.  $^1\text{H}$  NMR (500 MHz,  $\text{CDCl}_3$ ):  $\delta$  7.16 – 7.19 (m, 2H,  $\text{CH}_{\text{Ar}}$ ), 7.35 – 7.38 (m, 2H,  $\text{CH}_{\text{Ar}}$ ), 7.44 – 7.47 (m, 2H,  $\text{CH}_{\text{Ar}}$ ), 7.52 – 7.53 (m, 2H,  $\text{CH}_{\text{Ar}}$ ), 7.62 – 7.65 (m, 3H,  $\text{CH}_{\text{Ar}}$ ), 7.79 (s, 1H,  $\text{CH}_{\text{Ar}}$ ), 8.04 (s, 1H,  $\text{CH}_{\text{Ar}}$ ), 8.34 – 8.37 (m, 1H,  $\text{CH}_{\text{Ar}}$ ).

$^{13}\text{C}$  NMR (126 MHz,  $\text{CDCl}_3$ ):  $\delta$  104.6 (d,  $J_{\text{CF}} = 27.0$  Hz), 114.1 (d,  $J_{\text{CF}} = 23.0$  Hz), 121.4, 125.5, 127.1, 127.2, 127.4, 127.8 (d,  $^1J_{\text{CF}} = 3.1$  Hz), 128.7, 128.9, 129.0, 131.8, 140.7, 141.5, 153.2, 157.1 (d,  $J_{\text{CF}} = 11.7$  Hz), 165.5 (d,  $^1J_{\text{CF}} = 251.7$  Hz), 175.3.

HRMS (TOF MS ES<sup>+</sup>): Calcd for  $\text{C}_{21}\text{H}_{14}\text{O}_2\text{F}$  (M+H) 317.0987. Found 317.0978.

### 6-chloro-3-phenyl-4H-chromen-4-one (4fa).

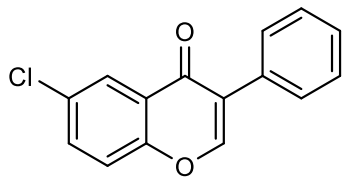

The title compound was prepared by following **protocol A** starting from photocatalyst Eosin Y (19.5 mg, 0.03 mmol, 0.03 equiv.), (E)-1-(5-chloro-2-hydroxyphenyl)-3-(dimethylamino)prop-2-en-1-one **1f** (225 mg, 1.0 mmol, 1.0 equiv.), benzenediazonium tetrafluoroborate **2a** (249 mg, 1.3 mmol, 1.3 equiv.) and dry DMSO (0.2 mmol/mL). Purification



was accomplished by gradient flash chromatography on silica gel using a mixture of hexane/ethyl acetate 9:1 to 7:1 as eluent to isolate the desired chromone derivative **4fa** (208 mg, 0.81 mmol, 81%).

Alternatively the title compound was prepared by following **protocol B** starting from photocatalyst Ru(bpy)<sub>3</sub>Cl<sub>2</sub>·6H<sub>2</sub>O (15.0 mg, 0.02 mmol, 0.02 equiv.), (E)-1-(5-chloro-2-hydroxyphenyl)-3-(dimethylamino)prop-2-en-1-one **1f** (225 mg, 1.0 mmol, 1.0 equiv.), diphenyliodonium triflate **3a** (645 mg, 1.5 mmol, 1.5 equiv.) and dry CH<sub>3</sub>CN (0.12 mmol/mL). Purification was accomplished by gradient flash chromatography on silica gel using a mixture of hexane/ethyl acetate 9:1 to 7:1 as eluent to isolate the desired chromone derivative **4fa** (192 mg, 0.75 mmol, 75%). This compound (187 mg, 0.73 mmol, 73 %) can be prepared following the same protocol starting from diphenyliodonium hexafluorophosphate (639 mg, 1.5 mmol, 1.5 equiv.).

White solid, mp 179-180°C. <sup>1</sup>H NMR (500 MHz, CDCl<sub>3</sub>): δ 7.40 – 7.47 (m, 4H, CH<sub>Ar</sub>), 7.55 (m, 2H, CH<sub>Ar</sub>), 7.62 (dd, 1H, <sup>3</sup>J = 8.9 Hz, <sup>4</sup>J = 2.6 Hz, CH<sub>Ar</sub>) 8.02 (s, 1H, CH<sub>Ar</sub>), 8.27 (d, 1H, <sup>4</sup>J = 2.6 Hz, CH<sub>Ar</sub>).

<sup>13</sup>C NMR (126 MHz, CDCl<sub>3</sub>): δ 119.8, 125.4, 125.5, 125.8, 128.4, 128.6, 128.9, 131.2, 131.3, 133.9, 153.2, 154.5, 175.1.

HRMS (TOF MS ES<sup>+</sup>): Calcd for C<sub>15</sub>H<sub>10</sub>O<sub>2</sub>Cl (M+H) 257.0374. Found 257.0369.

#### **6-chloro-3-(2-(trifluoromethoxy)phenyl)-4H-chromen-4-one (4fk).**

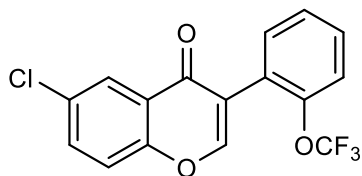

The title compound was prepared by following **protocol A** starting from photocatalyst Eosin Y (19.5 mg, 0.03 mmol, 0.03 equiv.), (E)-1-(5-chloro-2-hydroxyphenyl)-3-(dimethylamino)prop-2-en-1-one **1f** (225 mg, 1.0 mmol, 1.0 equiv.), 2-(trifluoromethoxy)benzenediazonium tetrafluoroborate **2k** (359 mg, 1.3 mmol, 1.3 equiv.) and dry DMSO (0.2 mmol/mL). Purification was accomplished by gradient flash chromatography on silica gel using a mixture of

hexane/ethyl acetate 7:1 to 5:1 as eluent to isolate the desired chromone derivative **4fk** (265 mg, 0.78 mmol, 78%).

Alternatively the title compound was prepared by following **protocol B** starting from photocatalyst Ru(bpy)<sub>3</sub>Cl<sub>2</sub>·6H<sub>2</sub>O (15.0 mg, 0.02 mmol, 0.02 equiv.), (E)-1-(5-chloro-2-hydroxyphenyl)-3-(dimethylamino)prop-2-en-1-one **1f** (225 mg, 1.0 mmol, 1.0 equiv.), bis(2-(trifluoromethoxy)phenyl)iodonium triflate **3k** (897 mg, 1.5 mmol, 1.5 equiv.) and dry CH<sub>3</sub>CN (0.12 mmol/mL). Purification was accomplished by gradient flash chromatography on silica gel using a mixture of hexane/ethyl acetate 7:1 to 5:1 as eluent to isolate the desired chromone derivative **4fk** (204 mg, 0.60 mmol, 60%).

White solid, mp 140-141 °C.  $^1\text{H}$  NMR (500 MHz,  $\text{CDCl}_3$ ):  $\delta$  7.35 – 7.38 (m, 2H,  $\text{CH}_{\text{Ar}}$ ), 7.43 – 7.48 (m, 3H,  $\text{CH}_{\text{Ar}}$ ), 7.63 (dd, 1H,  $^3J = 8.9$  Hz,  $^4J = 2.6$  Hz,  $\text{CH}_{\text{Ar}}$ ), 7.98 (s, 1H,  $\text{CH}_{\text{Ar}}$ ), 8.24 (d, 1H,  $^4J = 2.5$  Hz,  $\text{CH}_{\text{Ar}}$ ).

$^{13}\text{C}$  NMR (126 MHz,  $\text{CDCl}_3$ ):  $\delta$  119.9, 120.3 (d,  $^1J_{\text{CF}} = 258.3$  Hz), 120.8, 121.5, 124.7, 125.1, 125.7, 126.8, 130.1, 131.4, 132.4, 134.0, 147.3, 154.4, 154.6, 174.3.

HRMS (TOF MS ES<sup>+</sup>): Calcd for  $\text{C}_{16}\text{H}_9\text{O}_3\text{F}_3\text{Cl}$  (M+H) 341.0197. Found 341.0192.

**6-chloro-7-methyl-3-phenyl-4H-chromen-4-one (4ga).**

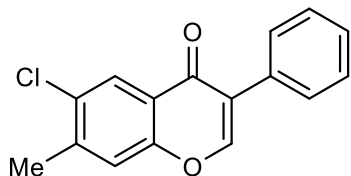

The title compound was prepared by following **protocol A** starting from photocatalyst Eosin Y (19.5 mg, 0.03 mmol, 0.03 equiv.), (E)-1-(5-chloro-2-hydroxy-4-methylphenyl)-3-(dimethylamino)prop-2-en-1-one **1g** (239 mg, 1.0 mmol, 1.0 equiv.), benzenediazonium tetrafluoroborate **2a** (249 mg, 1.3 mmol, 1.3 equiv.) and dry DMSO (0.2 mmol/mL).

Purification was accomplished by gradient flash chromatography on silica gel using a mixture of hexane/ethyl acetate 10:1 to 7:1 as eluent to isolate the desired chromone derivative **4ga** (243 mg, 0.90 mmol, 90%).

Alternatively the title compound was prepared by following **protocol B** starting from photocatalyst  $\text{Ru}(\text{bpy})_3\text{Cl}_2 \cdot 6\text{H}_2\text{O}$  (15.0 mg, 0.02 mmol, 0.02 equiv.), (E)-1-(5-chloro-2-hydroxy-4-methylphenyl)-3-(dimethylamino)prop-2-en-1-one **1g** (239 mg, 1.0 mmol, 1.0 equiv.), diphenyliodonium triflate **3a** (645 mg, 1.5 mmol, 1.5 equiv.) and dry  $\text{CH}_3\text{CN}$  (0.12 mmol/mL). Purification was accomplished by gradient flash chromatography on silica gel using a mixture of hexane/ethyl acetate 10:1 to 7:1 as eluent to isolate the desired chromone derivative **4ga** (214 mg, 0.79 mmol, 79%).

Light yellow solid, mp 193-194°C.  $^1\text{H}$  NMR (500 MHz,  $\text{CDCl}_3$ ):  $\delta$  2.52 (s, 3H, Me), 7.37 – 7.46 (m, 4H,  $\text{CH}_{\text{Ar}}$ ), 7.54 – 7.56 (m, 2H,  $\text{CH}_{\text{Ar}}$ ), 7.96 (s, 1H,  $\text{CH}_{\text{Ar}}$ ), 8.26 (s, 1H,  $\text{CH}_{\text{Ar}}$ ).

$^{13}\text{C}$  NMR (126 MHz,  $\text{CDCl}_3$ ):  $\delta$  20.8, 119.8, 123.6, 125.3, 126.0, 128.3, 128.6, 128.9, 131.6, 132.0, 142.9, 153.0, 154.5, 175.1.

HRMS (TOF MS ES<sup>+</sup>): Calcd for  $\text{C}_{16}\text{H}_{12}\text{O}_2\text{Cl}$  (M+H) 271.0529. Found 271.0526.

**6-chloro-3-(3,5-dimethoxyphenyl)-7-methyl-4H-chromen-4-one (4go).**

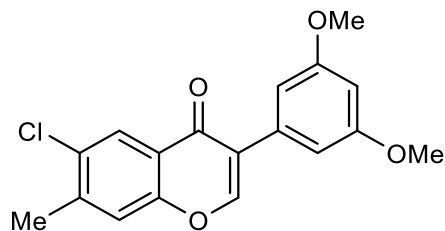

The title compound was prepared by following **protocol A** starting from photocatalyst Eosin Y (19.5 mg, 0.03 mmol, 0.03 equiv.), (E)-1-(5-chloro-2-hydroxy-4-methylphenyl)-3-(dimethylamino)prop-2-en-1-one **1g** (239 mg, 1.0 mmol, 1.0 equiv.), 3,5-dimethoxybenzenediazonium tetrafluoroborate **2o** (327 mg, 1.3 mmol, 1.3 equiv.) and dry DMSO (0.2 mmol/mL). Purification was accomplished by gradient flash chromatography on silica gel using a mixture of hexane/ethyl acetate 10:1 to 7:1 as eluent to isolate the desired chromone derivative **4go** (268 mg, 0.81 mmol, 81%). Light yellow solid, mp 158-159°C. <sup>1</sup>H NMR (500 MHz, CDCl<sub>3</sub>): δ 2.51 (s, 3H, Me), 3.82 (s, 6H, 2xOMe), 6.49 (s, 1H, CH<sub>Ar</sub>), 7.40 (s, 1H, CH<sub>Ar</sub>), 6.69 (d, 1H, <sup>4</sup>J = 2.0 Hz, CH<sub>Ar</sub>), 7.36 (s, 1H, CH<sub>Ar</sub>), 7.99 (s, 1H, CH<sub>Ar</sub>), 8.24 (br. s, 1H, CH<sub>Ar</sub>).

<sup>13</sup>C NMR (126 MHz, CDCl<sub>3</sub>): δ 20.8, 55.4, 100.6, 107.0, 119.8, 123.6, 125.1, 126.0, 132.0, 126.0, 132.0, 133.5, 143.0, 153.1, 154.4, 160.7, 175.0.

HRMS (TOF MS ES<sup>+</sup>): Calcd for C<sub>18</sub>H<sub>16</sub>O<sub>4</sub>Cl (M+H) 331.0745. Found 331.0737.

### 3-(2-bromophenyl)-6-chloro-7-methyl-4H-chromen-4-one (**4gs**).

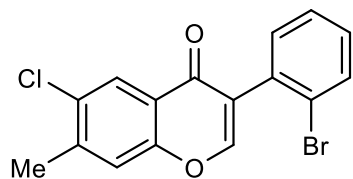

The title compound was prepared by following **protocol A** starting from photocatalyst Eosin Y (19.5 mg, 0.03 mmol, 0.03 equiv.), (E)-1-(5-chloro-2-hydroxy-4-methylphenyl)-3-(dimethylamino)prop-2-en-1-one **1g** (239 mg, 1.0 mmol, 1.0 equiv.), 2-bromobenzenediazonium tetrafluoroborate **2s** (352 mg, 1.3 mmol, 1.3 equiv.) and dry DMSO (0.2 mmol/mL). Purification was accomplished by gradient flash chromatography on silica gel using a mixture of hexane/ethyl acetate 10:1 to 8:1 as eluent to isolate the desired chromone derivative **4gs** (182 mg, 0.52 mmol, 52%).

Alternatively the title compound was prepared by following **protocol B** starting from photocatalyst Ru(bpy)<sub>3</sub>Cl<sub>2</sub>·6H<sub>2</sub>O (15.0 mg, 0.02 mmol, 0.02 equiv.), (E)-1-(5-chloro-2-hydroxy-4-methylphenyl)-3-(dimethylamino)prop-2-en-1-one **1g** (239 mg, 1.0 mmol, 1.0 equiv.), bis(2-bromophenyl)iodonium triflate **3s** (882 mg, 1.5 mmol, 1.5 equiv.) and dry CH<sub>3</sub>CN (0.12 mmol/mL). Purification was accomplished by gradient flash chromatography on silica gel using a mixture of hexane/ethyl acetate 10:1 to 8:1 as eluent to isolate the desired chromone derivative **4gs** (108 mg, 0.31 mmol, 31%).

Light brown solid, mp 186-187°C. <sup>1</sup>H NMR (500 MHz, CDCl<sub>3</sub>): δ 2.51 (s, 3H, Me), 7.24 – 7.28 (m, 1H, CH<sub>Ar</sub>), 7.31 (dd, 1H, <sup>3</sup>J = 7.8 Hz, <sup>4</sup>J = 1.9 Hz, CH<sub>Ar</sub>), 7.36 (dd, 1H, <sup>3</sup>J = 7.6 Hz, <sup>4</sup>J = 0.9 Hz, CH<sub>Ar</sub>), 7.39 (s, 1H, CH<sub>Ar</sub>), 7.66 (dd, 1H, <sup>3</sup>J = 8.9 Hz, <sup>4</sup>J = 0.9 Hz, CH<sub>Ar</sub>), 7.90 (s, 1H, CH<sub>Ar</sub>), 8.24 (br. s, 1H, CH<sub>Ar</sub>).

$^{13}\text{C}$  NMR (126 MHz,  $\text{CDCl}_3$ ):  $\delta$  20.8, 119.9, 123.4, 124.7, 125.7, 126.0, 127.4, 130.1, 132.0, 132.1, 132.6, 133.0, 143.1, 154.3, 154.6, 174.3.

HRMS (TOF MS ES<sup>+</sup>): Calcd for  $\text{C}_{16}\text{H}_{11}\text{O}_2\text{ClBr}$  (M+H) 348.9637. Found 348.9631.

#### 6-chloro-7-methyl-3-(2-nitrophenyl)-4H-chromen-4-one (4gt).

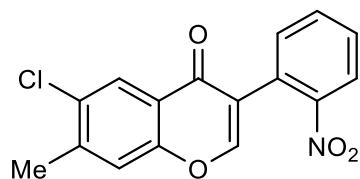

The title compound was prepared by following **protocol A** starting from photocatalyst Eosin Y (19.5 mg, 0.03 mmol, 0.03 equiv.), (E)-1-(5-chloro-2-hydroxy-4-methylphenyl)-3-(dimethylamino)prop-2-en-1-one **1g** (239 mg, 1.0 mmol, 1.0 equiv.), 2-nitrobenzenediazonium tetrafluoroborate **2t** (308 mg, 1.3 mmol, 1.3 equiv.) and dry DMSO (0.2 mmol/mL). Purification was accomplished by gradient flash chromatography on silica gel using a mixture of

hexane/ethyl acetate 7:1 to 3:1 as eluent to isolate the desired chromone derivative **4gt** (218 mg, 0.69 mmol, 69%).

Yellow solid, mp 189-190°C.  $^1\text{H}$  NMR (500 MHz,  $\text{CDCl}_3$ ):  $\delta$  2.52 (s, 3H, Me), 7.37 (dd, 1H,  $^3J = 7.5$  Hz,  $^4J = 1.0$  Hz,  $\text{CH}_{\text{Ar}}$ ), 7.40 (s, 1H,  $\text{CH}_{\text{Ar}}$ ), 7.58 (dd, 1H,  $^3J = 7.1$  Hz,  $^4J = 1.0$  Hz,  $\text{CH}_{\text{Ar}}$ ), 7.67 (dd, 1H,  $^3J = 7.5$  Hz,  $^4J = 1.4$  Hz,  $\text{CH}_{\text{Ar}}$ ), 8.01 (s, 1H,  $\text{CH}_{\text{Ar}}$ ), 8.10 (dd, 1H,  $^3J = 8.0$  Hz,  $^4J = 1.3$  Hz,  $\text{CH}_{\text{Ar}}$ ), 8.19 (br. s, 1H,  $\text{CH}_{\text{Ar}}$ ).

$^{13}\text{C}$  NMR (126 MHz,  $\text{CDCl}_3$ ):  $\delta$  20.9, 119.9, 122.7, 124.5, 124.9, 126.1, 126.6, 129.7, 132.0, 132.3, 133.3, 143.5, 149.6, 152.0, 154.7, 174.0.

HRMS (TOF MS ES<sup>+</sup>): Calcd for  $\text{C}_{16}\text{H}_{11}\text{NO}_4\text{Cl}$  (M+H) 316.0381. Found 316.0377.

#### 3-(4-ethoxyphenyl)-4H-benzo[h]chromen-4-one (4hl).

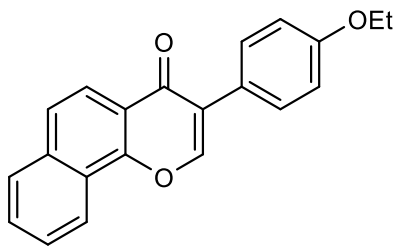

The title compound was prepared by following **protocol A** starting from photocatalyst Eosin Y (19.5 mg, 0.03 mmol, 0.03 equiv.), (E)-3-(dimethylamino)-1-(1-hydroxynaphthalen-2-yl)prop-2-en-1-one **1h** (241 mg, 1.0 mmol, 1.0 equiv.), 4-ethoxybenzenediazonium tetrafluoroborate **2l** (307 mg, 1.3 mmol, 1.3 equiv.) and dry DMSO (0.2 mmol/mL). Purification was accomplished by gradient flash chromatography on silica gel using a mixture of hexane/ethyl acetate 7:1 to 5:1 as eluent to isolate the desired chromone derivative **4hl** (265 mg, 0.84 mmol,

84%).

Alternatively the title compound was prepared by following **protocol B** starting from photocatalyst  $\text{Ru}(\text{bpy})_3\text{Cl}_2 \cdot 6\text{H}_2\text{O}$  (15.0 mg, 0.02 mmol, 0.02 equiv.), (E)-3-(dimethylamino)-1-(1-hydroxynaphthalen-2-yl)prop-2-en-1-one **1h** (241 mg, 1.0 mmol, 1.0 equiv.), bis(4-ethoxyphenyl)iodonium

triflate **3l** (777 mg, 1.5 mmol, 1.5 equiv.) and dry CH<sub>3</sub>CN (0.12 mmol/mL). Purification was accomplished by gradient flash chromatography on silica gel using a mixture of hexane/ethyl acetate 7:1 to 5:1 as eluent to isolate the desired chromone derivative **4hl** (227 mg, 0.72 mmol, 72%). Light yellow solid, mp 159 - 160 °C. <sup>1</sup>H NMR (500 MHz, CDCl<sub>3</sub>): δ 1.44 (t, 3H, <sup>3</sup>J = 8.5 Hz, OCH<sub>2</sub>CH<sub>3</sub>), 4.08 (q, 2H, <sup>3</sup>J = 7.3 Hz, OCH<sub>2</sub>CH<sub>3</sub>), 6.98 (d, 2H, <sup>3</sup>J = 8.0 Hz, CH<sub>Ar</sub>), 7.57 (d, 2H, <sup>3</sup>J = 8.8 Hz, CH<sub>Ar</sub>), 7.67 – 7.72 (m, 2H, CH<sub>Ar</sub>), 7.76 (d, 1H, <sup>3</sup>J = 8.7 Hz, CH<sub>Ar</sub>), 7.92 (d, 1H, <sup>3</sup>J = 7.8 Hz, CH<sub>Ar</sub>), 8.17 (s, 1H, CH<sub>Ar</sub>), 8.23 (d, 1H, <sup>3</sup>J = 8.6 Hz, CH<sub>Ar</sub>), 8.48 (d, 1H, <sup>3</sup>J = 7.8 Hz, CH<sub>Ar</sub>). <sup>13</sup>C NMR (126 MHz, CDCl<sub>3</sub>): δ 14.8, 63.5, 114.5, 120.8, 121.3, 122.2, 123.8, 124.0, 125.2, 126.2, 127.1, 128.1, 129.2, 130.1, 135.6, 151.6, 153.5, 159.1, 176.3.

HRMS (TOF MS ES<sup>+</sup>): Calcd for C<sub>21</sub>H<sub>17</sub>O<sub>3</sub> (M+H) 317.1176. Found 317.1178.

### 3-(2-fluorophenyl)-4H-benzo[h]chromen-4-one (**4hq**).

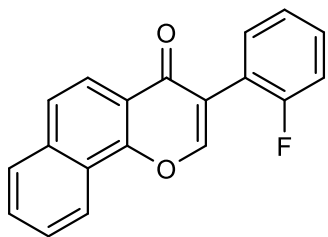

The title compound was prepared by following **protocol A** starting from photocatalyst Eosin Y (19.5 mg, 0.03 mmol, 0.03 equiv.), (E)-3-(dimethylamino)-1-(1-hydroxynaphthalen-2-yl)prop-2-en-1-one **1h** (241 mg, 1.0 mmol, 1.0 equiv.), 2-fluorobenzenediazonium tetrafluoroborate **2q** (273 mg, 1.3 mmol, 1.3 equiv.) and dry DMSO (0.2 mmol/mL). Purification was accomplished by gradient flash chromatography on silica gel using a mixture of hexane/ethyl acetate 7:1 to 3:1 as eluent to isolate the desired chromone derivative **4hq** (232 mg, 0.80 mmol, 80%).

Alternatively the title compound was prepared by following **protocol B** starting from photocatalyst Ru(bpy)<sub>3</sub>Cl<sub>2</sub>·6H<sub>2</sub>O (15.0 mg, 0.02 mmol, 0.02 equiv.), (E)-3-(dimethylamino)-1-(1-hydroxynaphthalen-2-yl)prop-2-en-1-one **1h** (241 mg, 1.0 mmol, 1.0 equiv.), bis(2-fluorophenyl)iodonium triflate **3q** (699 mg, 1.5 mmol, 1.5 equiv.) and dry CH<sub>3</sub>CN (0.12 mmol/mL). Purification was accomplished by gradient flash chromatography on silica gel using a mixture of hexane/ethyl acetate 7:1 to 3:1 as eluent to isolate the desired chromone derivative **4hq** (188 mg, 0.63 mmol, 63%). This compound (185 mg, 0.64 mmol, 64 %) can be prepared following the same protocol starting from bis(2-fluorophenyl)iodonium hexafluorophosphate (693 mg, 1.5 mmol, 1.5 equiv.).

Light yellow solid, mp 181-182 °C. <sup>1</sup>H NMR (500 MHz, CDCl<sub>3</sub>): δ 7.19 – 7.27 (m, 2H, CH<sub>Ar</sub>), 7.39 – 7.42 (m, 1H, CH<sub>Ar</sub>), 7.58 (dt, 1H, <sup>3</sup>J = 7.4 Hz, <sup>4</sup>J = 1.6 Hz, CH<sub>Ar</sub>), 7.68 – 7.74 (m, 2H, CH<sub>Ar</sub>), 7.79 (d, 1H, <sup>3</sup>J = 8.7 Hz, CH<sub>Ar</sub>), 7.94 (d, 1H, <sup>3</sup>J = 7.8 Hz, CH<sub>Ar</sub>), 8.24 (d, 1H, <sup>3</sup>J = 8.8 Hz, CH<sub>Ar</sub>), 8.25 (s, 1H, CH<sub>Ar</sub>), 8.50 (d, 1H, <sup>3</sup>J = 8.0 Hz, CH<sub>Ar</sub>).

$^{13}\text{C}$  NMR (126 MHz,  $\text{CDCl}_3$ ):  $\delta$  115.8 (d,  $J_{\text{CF}} = 22.3$  Hz), 119.4 (d,  $J_{\text{CF}} = 14.1$  Hz), 120.7, 121.2, 121.5, 122.2, 123.9, 124.1 (d,  $^1J_{\text{CF}} = 3.5$  Hz), 125.5, 127.2, 128.1, 129.4, 130.1 (d,  $J_{\text{CF}} = 8.4$  Hz), 132.0 (d,  $J_{\text{CF}} = 2.8$  Hz), 135.8, 153.6, 153.7 (d,  $J_{\text{CF}} = 3.2$  Hz), 160.3 (d,  $^1J_{\text{CF}} = 247.6$  Hz), 175.4.

HRMS (TOF MS ES<sup>+</sup>): Calcd for  $\text{C}_{19}\text{H}_{12}\text{O}_2\text{F}$  (M+H) 291.0828. Found 291.0821.

**(C) Copies  $^1\text{H}$  and  $^{13}\text{C}$  NMR spectra**

### Compound 4af

SpinWorks 4: ISM 113-1 1H

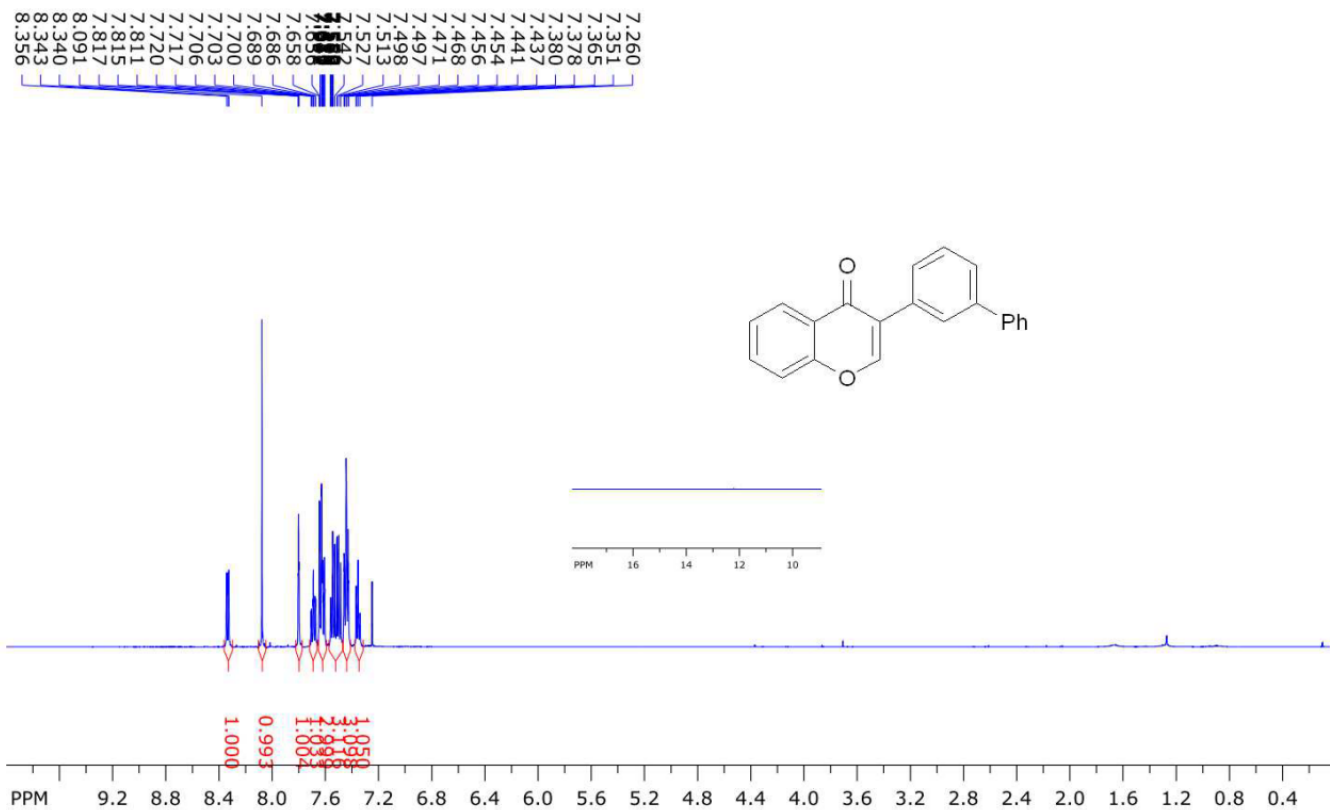

```
file: D:\NAPO\NMR\500-2\mkr10701\1\fid  expt: <zg30>
transmitter freq.: 500.133001 MHz
time domain size: 65536 points
width: 12335.53 Hz = 24.6645 ppm = 0.188225 Hz/pt
number of scans: 24
```

freq. of 0 ppm: 500.130023 MHz  
processed size: 65536 complex points  
LB: 0.300 GF: 0.0000  
Hz/cm: 199.770 ppm/cm: 0.39943



# Compound 4af

SpinWorks 4: ISM 113 13C

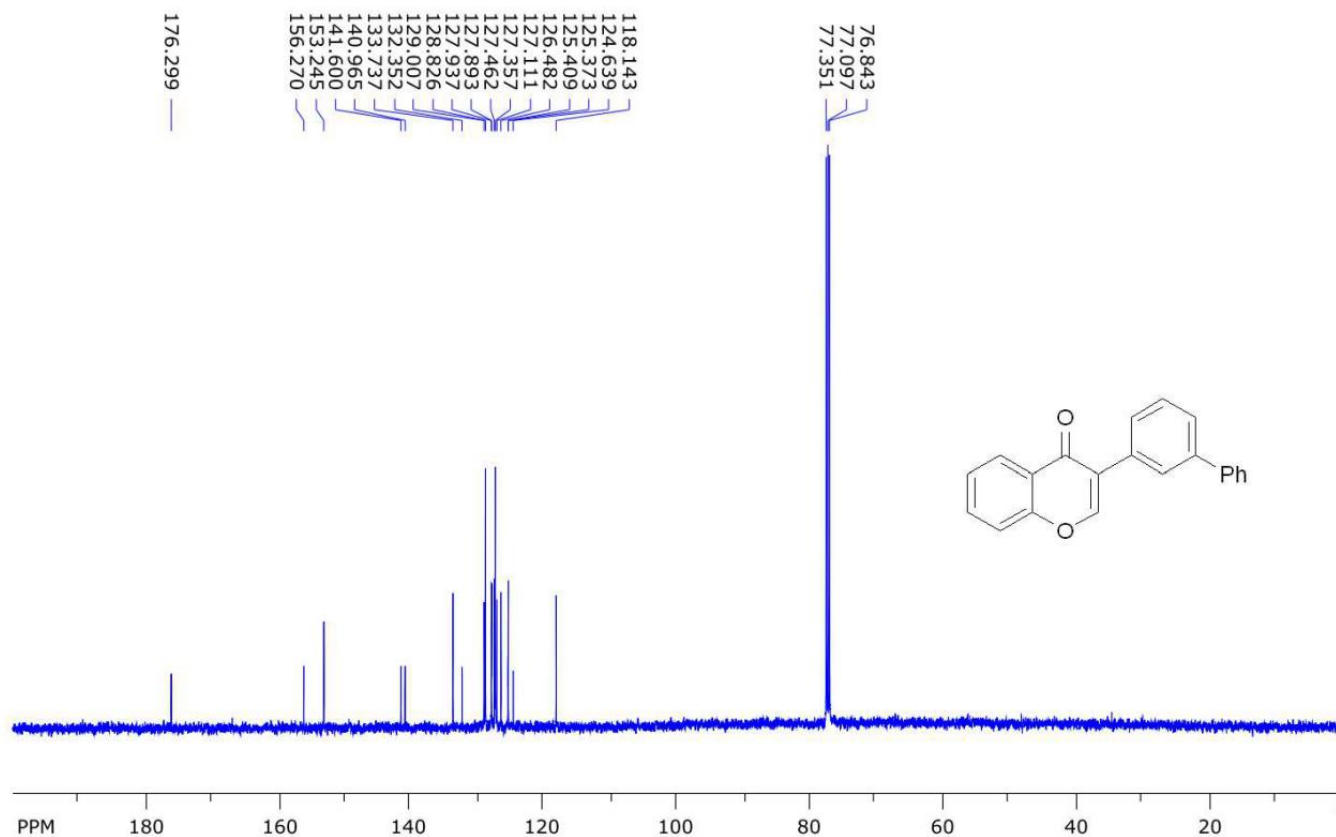

file: D:\NAPO\NMR\500-2\mkr10701\2\fid expt: <zpgg30>  
 transmitter freq.: 125.772879 MHz  
 time domain size: 65536 points  
 width: 36057.69 Hz = 286.6889 ppm = 0.550197 Hz/pt  
 number of scans: 512

freq. of 0 ppm: 125.757789 MHz  
 processed size: 32768 complex points  
 LB: 2.000 GF: 0.0000  
 Hz/cm: 1011.530 ppm/cm: 8.04251

# Compound 4aj

SpinWorks 4: ISM 17 1H

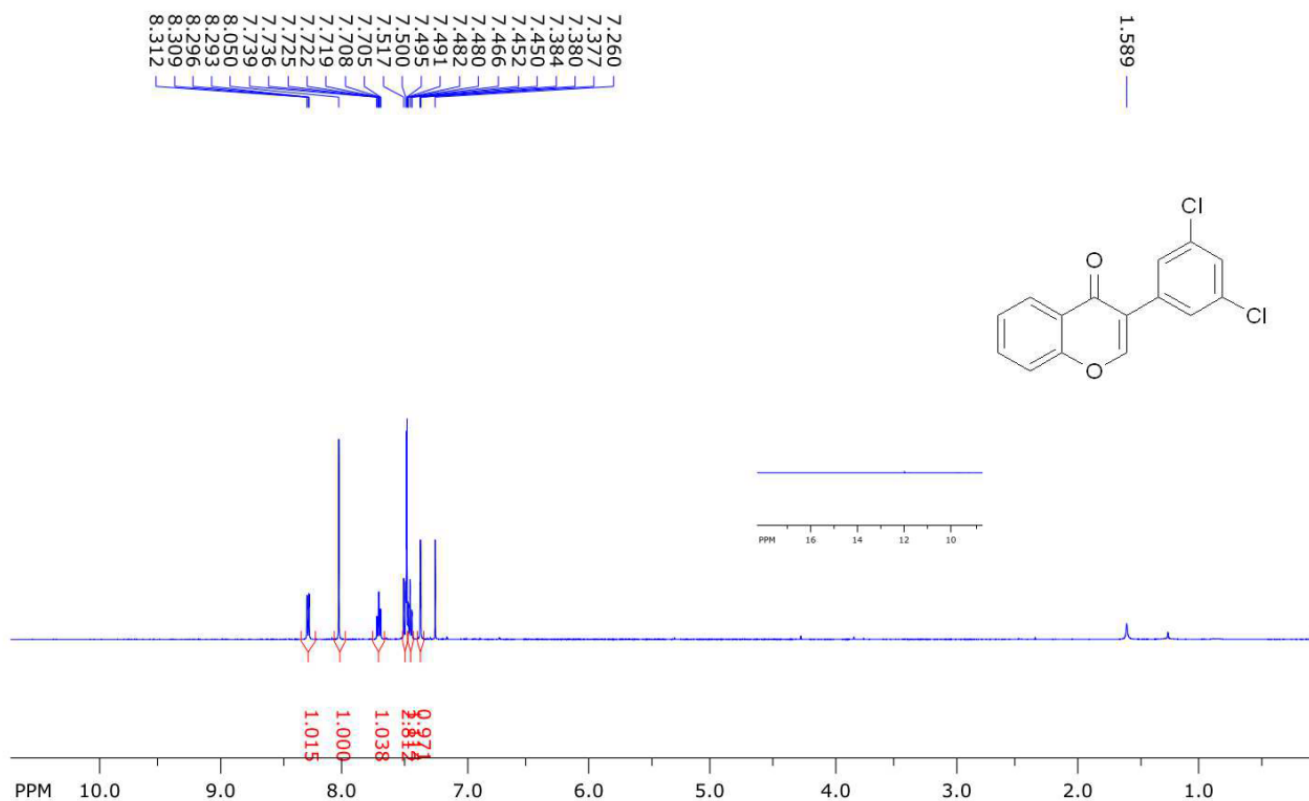

file: F:\Napo\NMR\500-1\mkr10602\1\fid expt: <zg30>  
 transmitter freq.: 500.133001 MHz  
 time domain size: 65536 points  
 width: 12335.53 Hz = 24.6645 ppm = 0.188225 Hz/pt  
 number of scans: 24

freq. of 0 ppm: 500.130023 MHz  
 processed size: 65536 complex points  
 LB: 0.300 GF: 0.0000  
 Hz/cm: 214.770 ppm/cm: 0.42943

# Compound 4aj

SpinWorks 4: ISM 17 1H

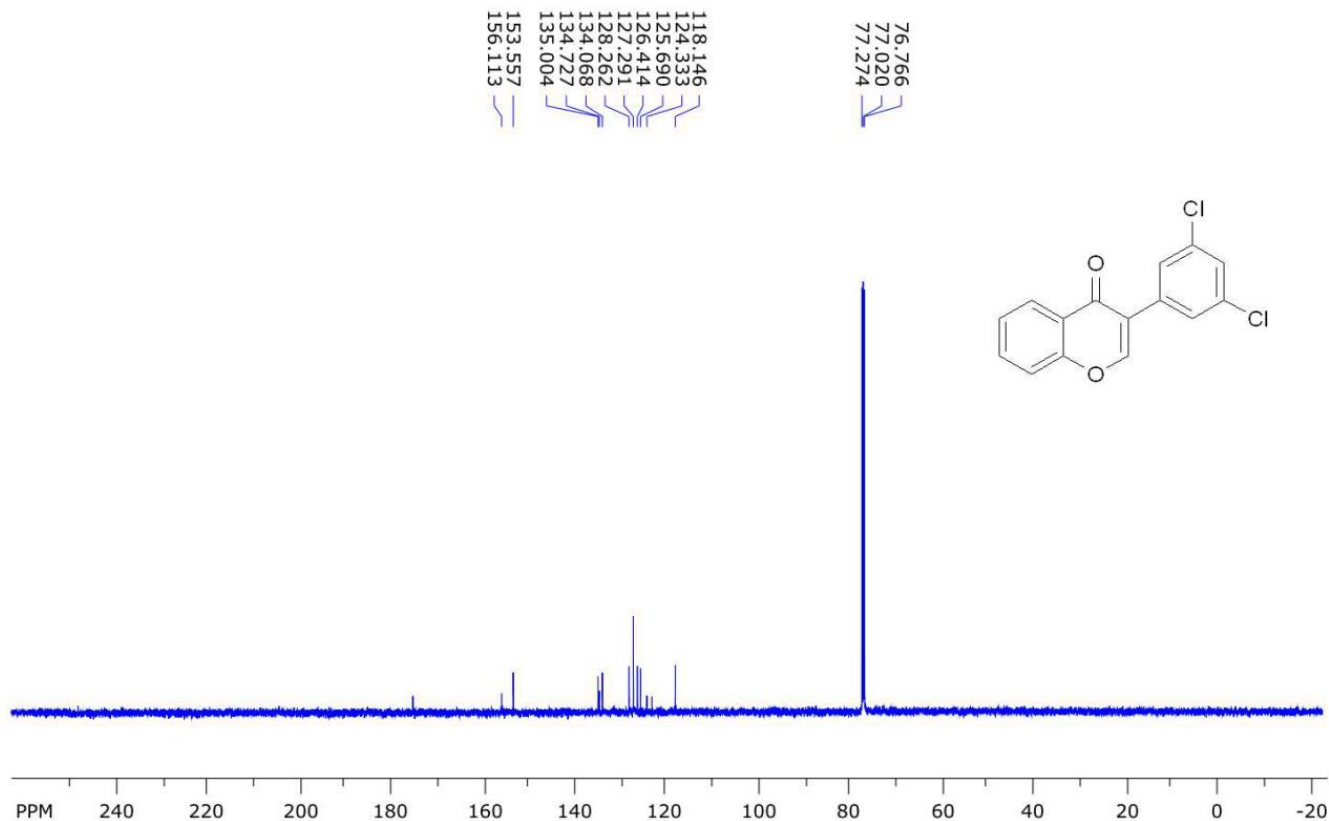

file: F:\Napo\NMR\500-1\mkr10602\2\fid expt: <zpgp30>  
 transmitter freq.: 125.772879 MHz  
 time domain size: 65536 points  
 width: 36057.69 Hz = 286.6889 ppm = 0.550197 Hz/pt  
 number of scans: 256

freq. of 0 ppm: 125.757792 MHz  
 processed size: 32768 complex points  
 LB: 2.000 GF: 0.0000  
 Hz/cm: 1442.308 ppm/cm: 11.46756

# Compound 4ar

SpinWorks 4: ISM 70R

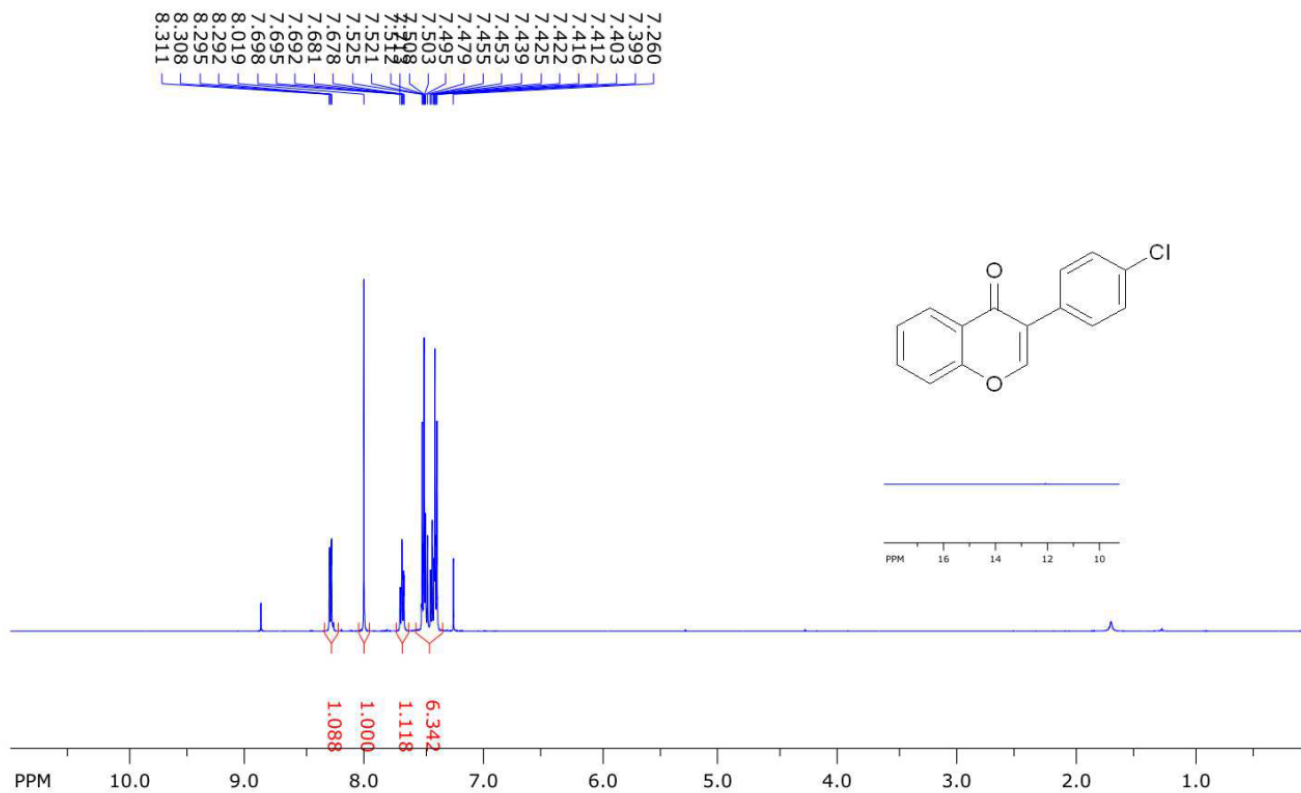

file: F:\Napo\NMR\500-1\mkr12706\13\fid expt: <zg30>  
 transmitter freq.: 500.133001 MHz  
 time domain size: 65536 points  
 width: 12335.53 Hz = 24.6645 ppm = 0.188225 Hz/pt  
 number of scans: 32

freq. of 0 ppm: 500.130023 MHz  
 processed size: 65536 complex points  
 LB: 0.300 GF: 0.0000  
 Hz/cm: 219.727 ppm/cm: 0.43934

# Compound 4ar

SpinWorks 4: ISM 70R

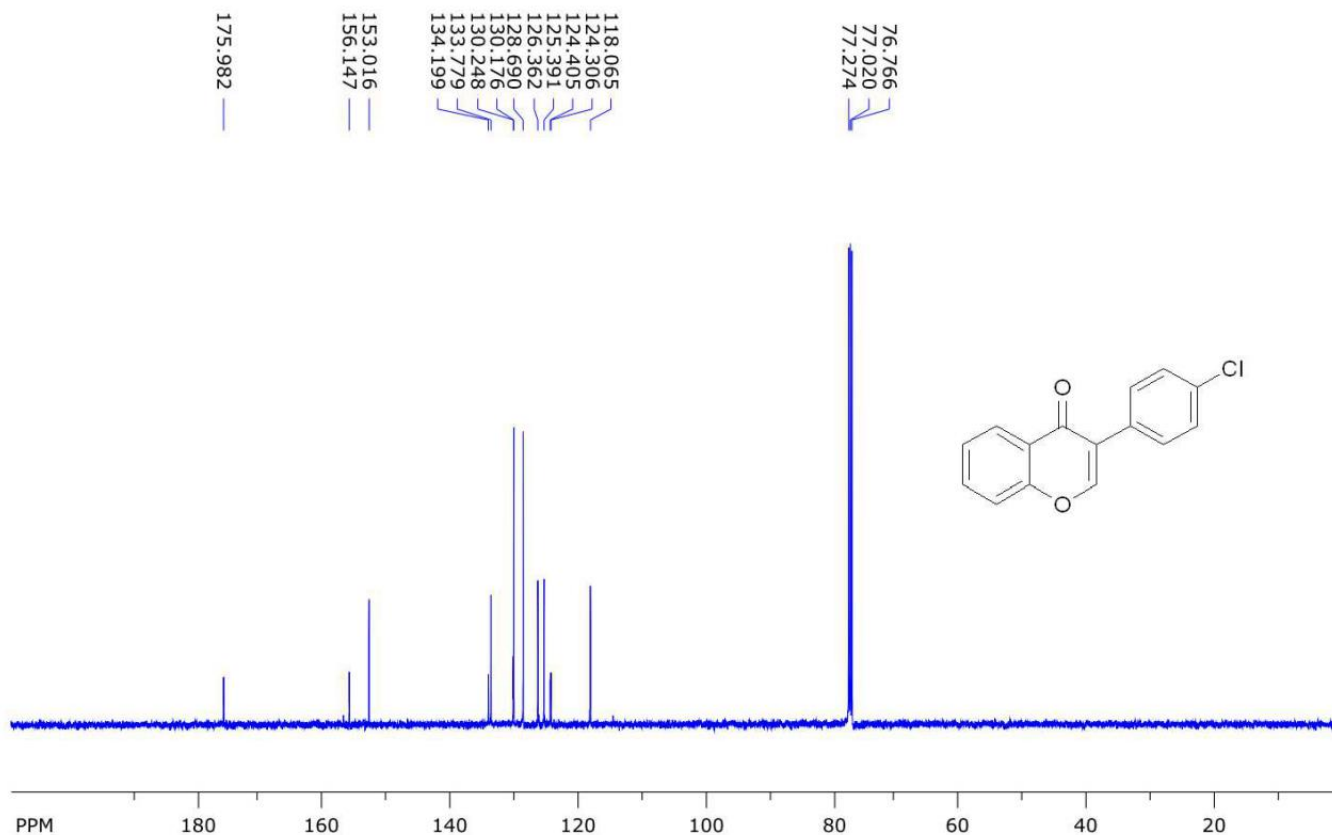

file: F:\Napo\NMR\500-1\mkr12706\14\fid expt: <zpgg30>  
 transmitter freq.: 125.772879 MHz  
 time domain size: 65536 points  
 width: 36057.69 Hz = 286.6889 ppm = 0.550197 Hz/pt  
 number of scans: 368

freq. of 0 ppm: 125.757796 MHz  
 processed size: 32768 complex points  
 LB: 2.000 GF: 0.0000  
 Hz/cm: 1057.585 ppm/cm: 8.40869

# Compound 4av

SpinWorks 4: ISM 94-1 1H

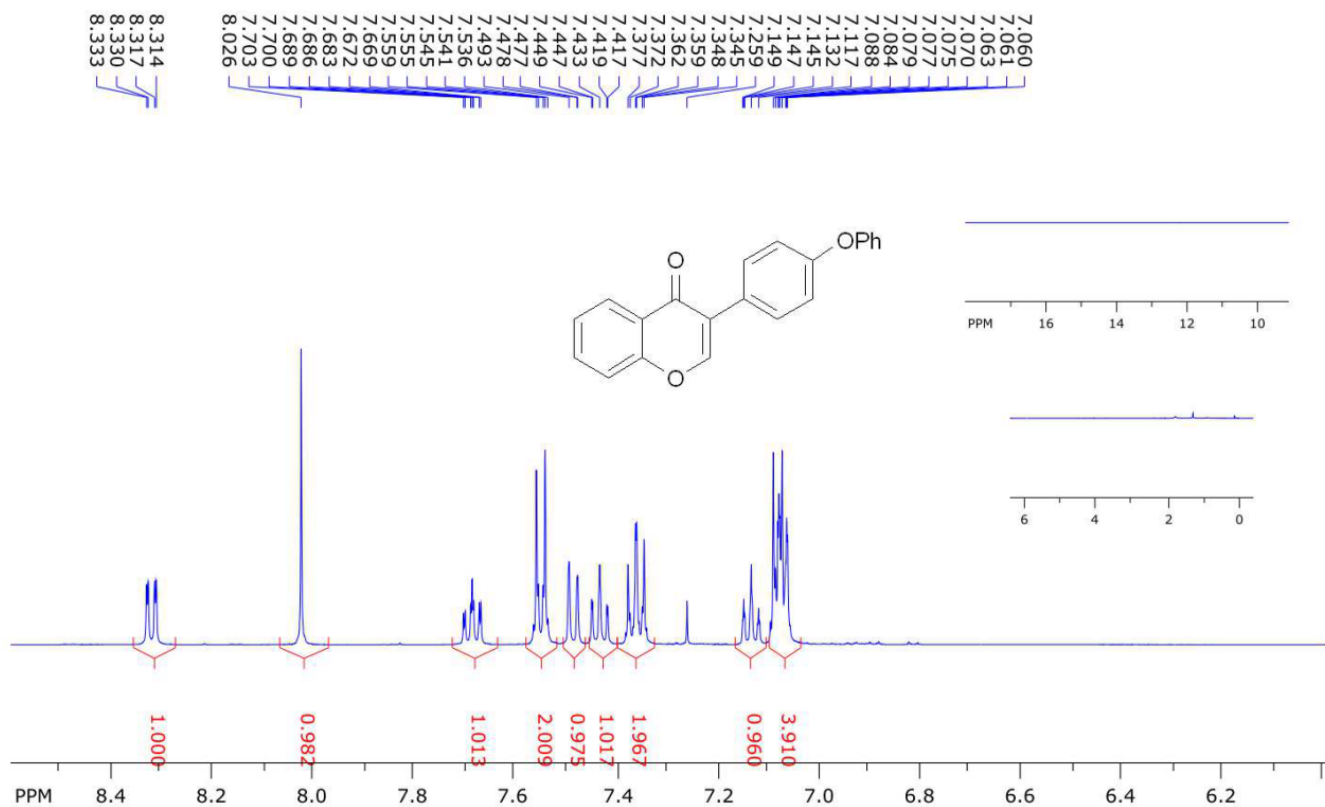

file: D:\NAPO\NMR\500-1\mkr11611\49\fid exp: <zg30>  
transmitter freq.: 500.133001 MHz  
time domain size: 65536 points  
width: 12335.53 Hz = 24.6645 ppm = 0.188225 Hz/pt  
number of scans: 24

freq. of 0 ppm: 500.130024 MHz  
processed size: 65536 complex points  
LB: 0.300 GF: 0.0000  
Hz/cm: 52.290 ppm/cm: 0.10455

# Compound 4av

SpinWorks 4: ISM 94-1 13C

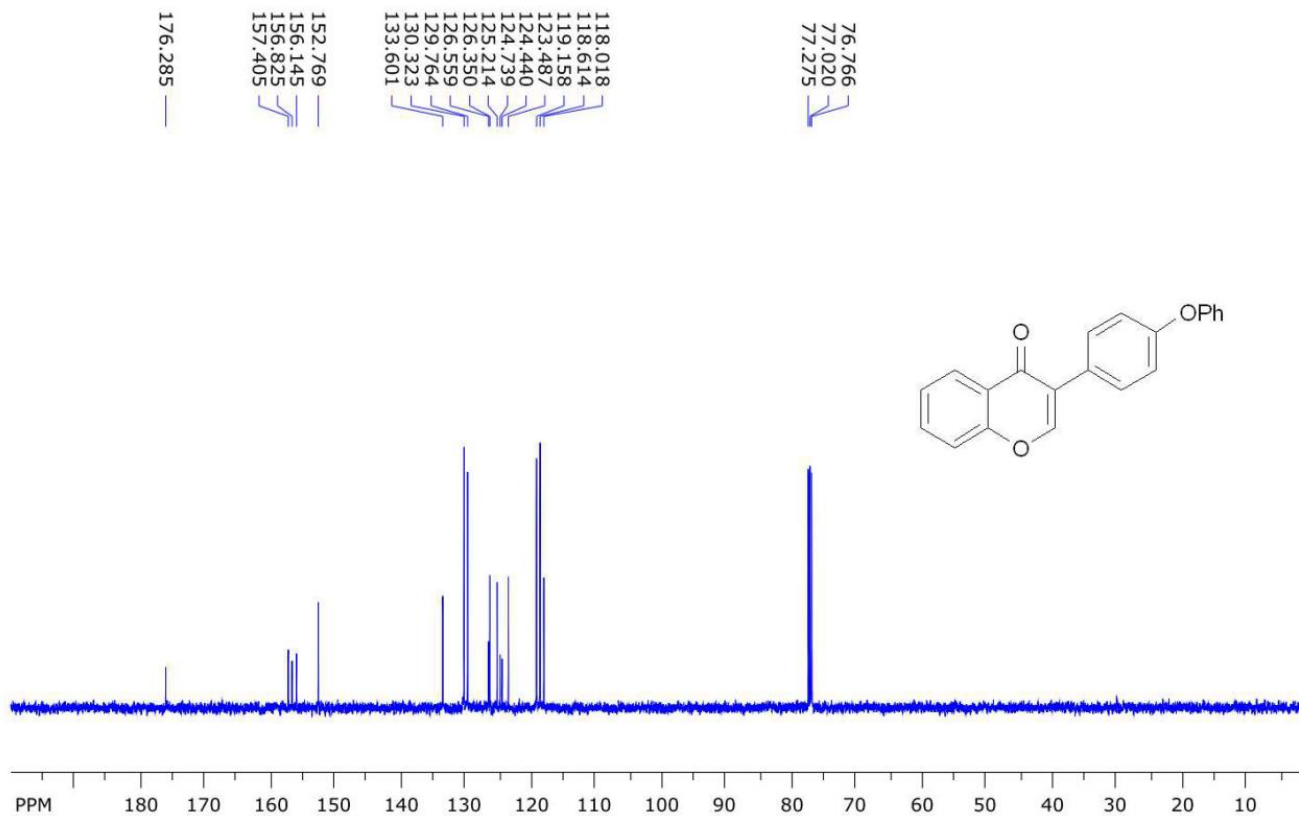

file: D:\NAPO\NMR\500-1\mkr11611\50\fid expt: <zpgg30>  
transmitter freq.: 125.772879 MHz  
time domain size: 65536 points  
width: 36057.69 Hz = 286.6889 ppm = 0.550197 Hz/pt  
number of scans: 64

freq. of 0 ppm: 125.757799 MHz  
processed size: 32768 complex points  
LB: 2.000 GF: 0.0000  
Hz/cm: 1005.148 ppm/cm: 7.99177

# Compound 4bb

SpinWorks 4: ISM 78 1H

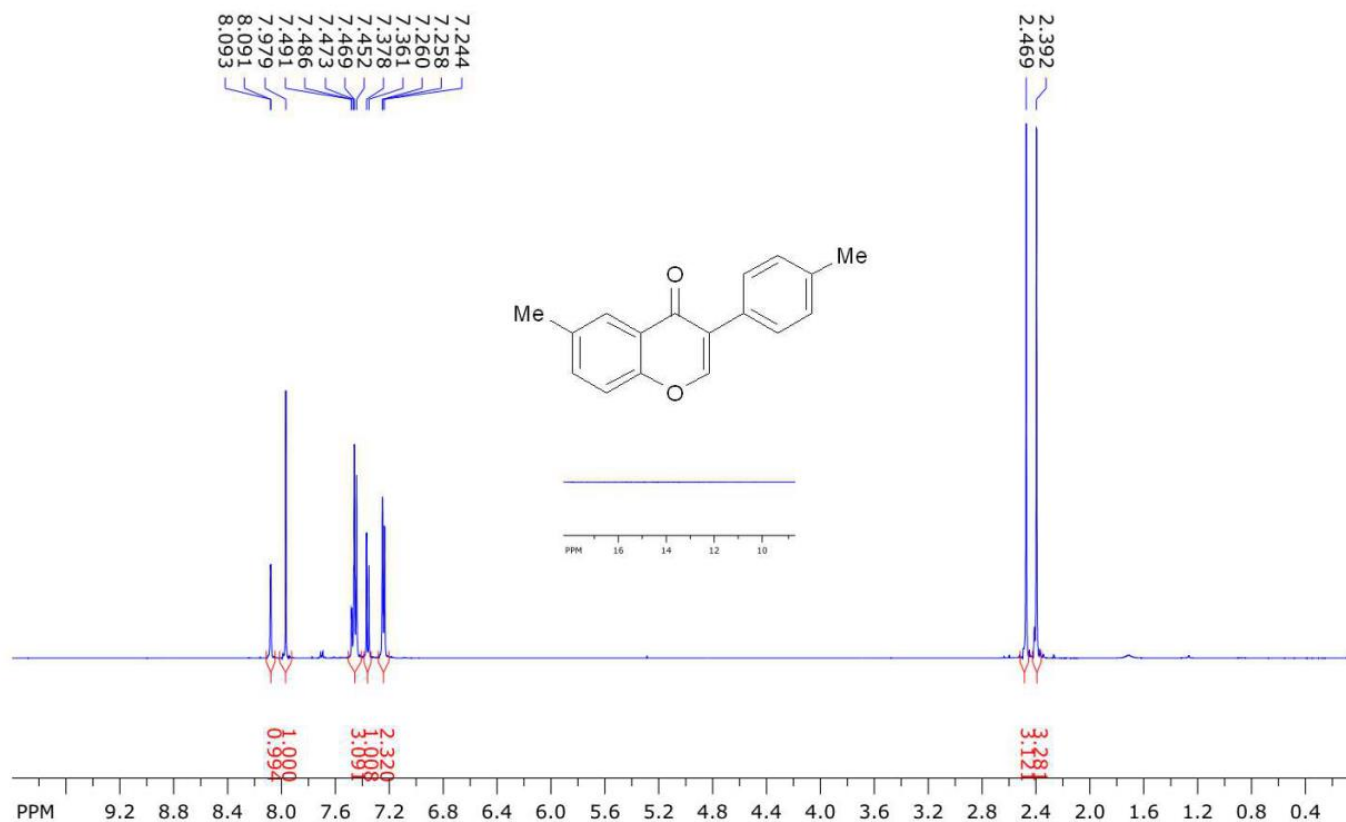

file: D:\NAPO\NMR\500-1\mkr12706\11\fid expt: <zg30>  
 transmitter freq.: 500.133001 MHz  
 time domain size: 65536 points  
 width: 12335.53 Hz = 24.6645 ppm = 0.188225 Hz/pt  
 number of scans: 32

freq. of 0 ppm: 500.130025 MHz  
 processed size: 65536 complex points  
 LB: 0.300 GF: 0.0000  
 Hz/cm: 199.770 ppm/cm: 0.39943



# Compound 4bb

SpinWorks 4: ISM 78 13C

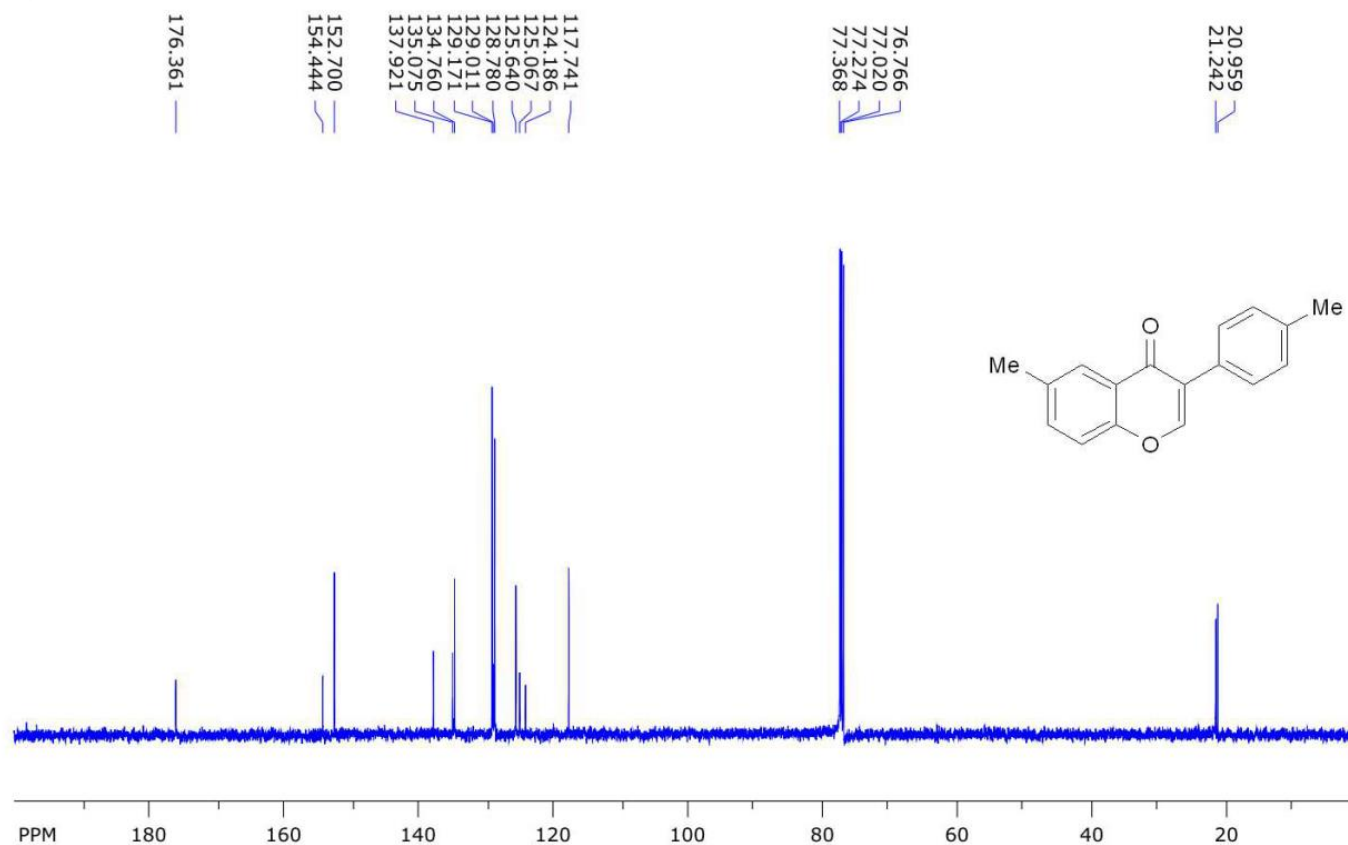

file: D:\NAPO\NMR\500-1\mkr12706\12\fid expt: <zpgg30>  
 transmitter freq.: 125.772879 MHz  
 time domain size: 65536 points  
 width: 36057.69 Hz = 286.6889 ppm = 0.550197 Hz/pt  
 number of scans: 164

freq. of 0 ppm: 125.757797 MHz  
 processed size: 32768 complex points  
 LB: 2.000 GF: 0.0000  
 Hz/cm: 1006.744 ppm/cm: 8.00446

# Compound 4bc

SpinWorks 4: ISM 75 1H

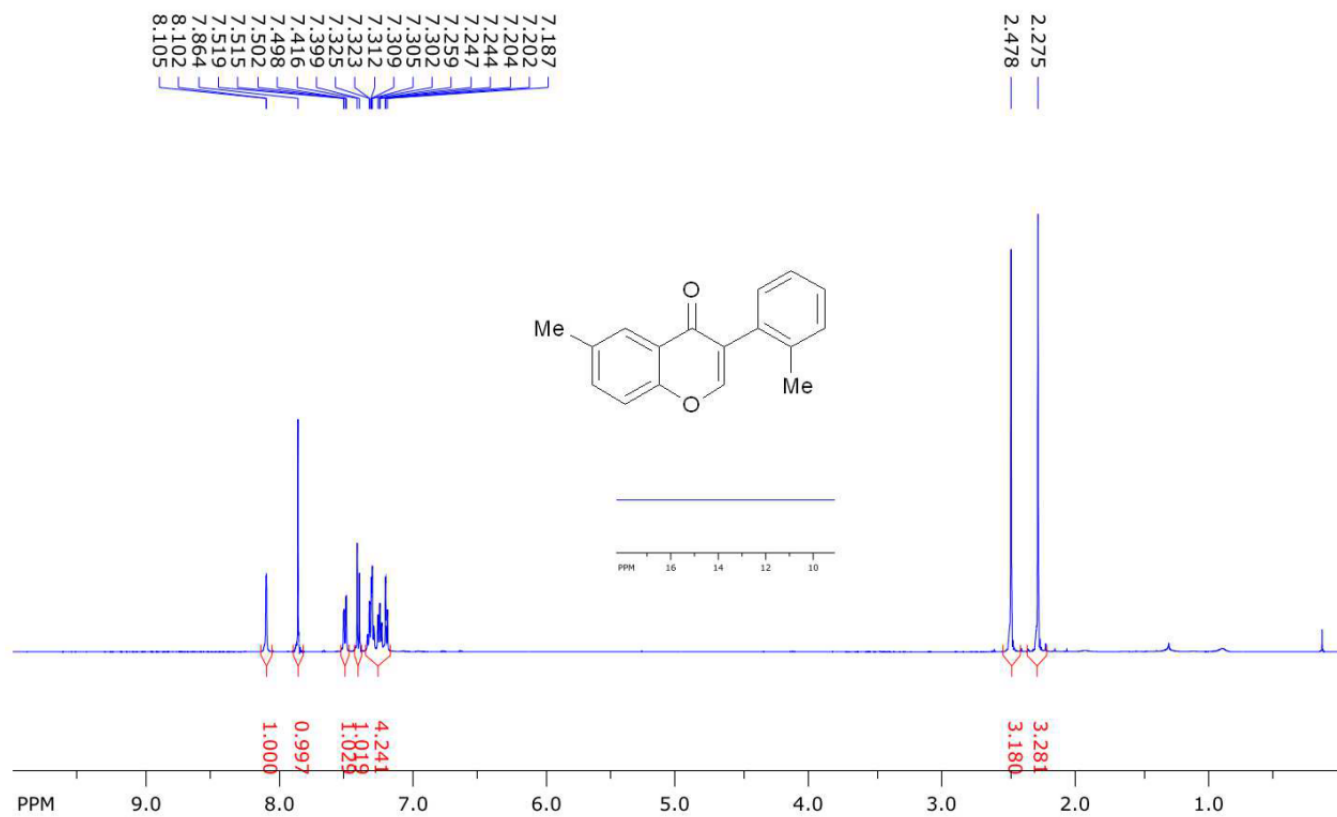

file: D:\NAPO\NMR\500-1\mkr12706\29\fid expt: <zg30>  
 transmitter freq.: 500.133001 MHz  
 time domain size: 65536 points  
 width: 12335.53 Hz = 24.6645 ppm = 0.188225 Hz/pt  
 number of scans: 16

freq. of 0 ppm: 500.130024 MHz  
 processed size: 65536 complex points  
 LB: 0.300 GF: 0.0000  
 Hz/cm: 200.862 ppm/cm: 0.40162

# Compound 4bc

SpinWorks 4: ISM 75 13C

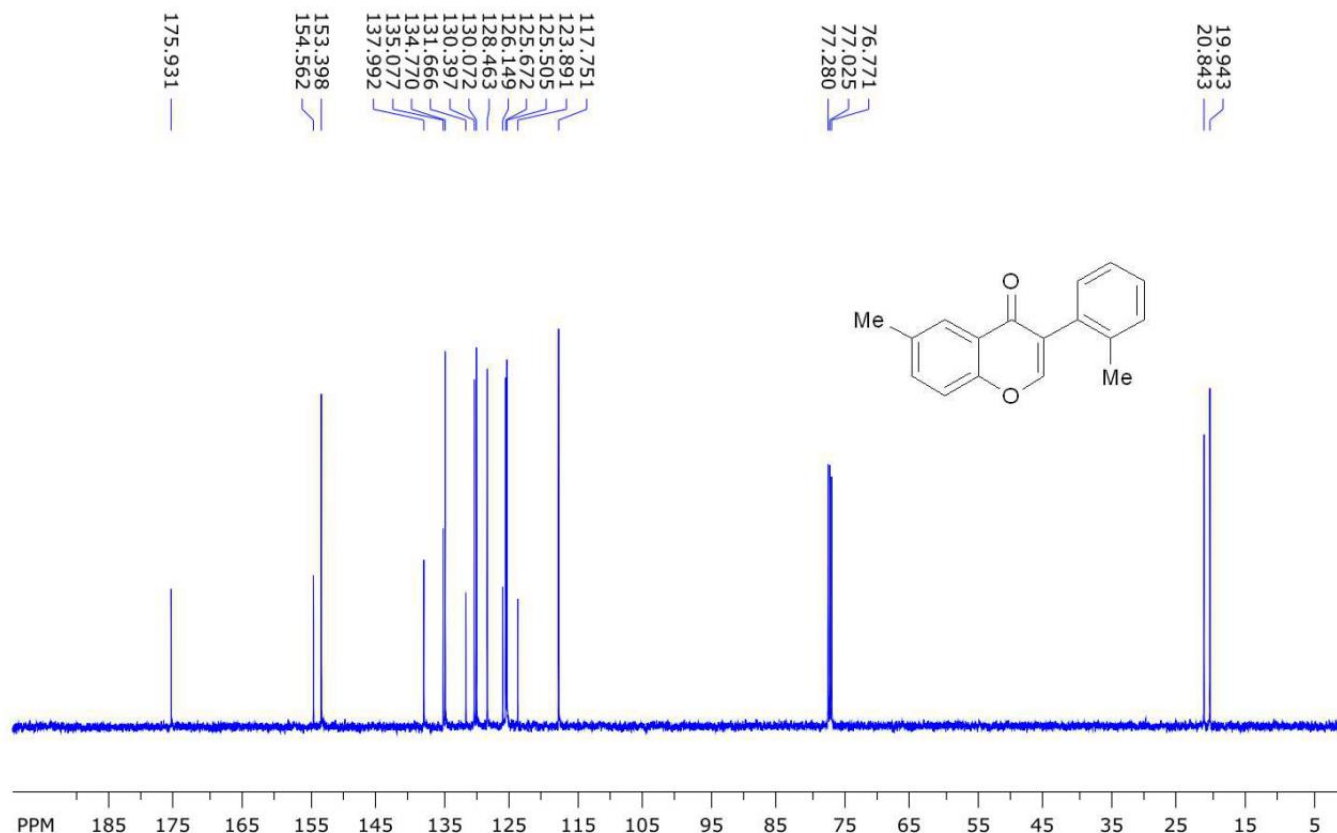

file: D:\NAPO\NMR\500-1\mkr12706\30\fid expt: <zgpg30>  
transmitter freq.: 125.772879 MHz  
time domain size: 65536 points  
width: 36057.69 Hz = 286.6889 ppm = 0.550197 Hz/pt  
number of scans: 128

freq. of 0 ppm: 125.757812 MHz  
processed size: 32768 complex points  
LB: 2.000 GF: 0.0000  
Hz/cm: 1003.553 ppm/cm: 7.97909

# Compound 4bd

SpinWorks 4: ISM 131 1H

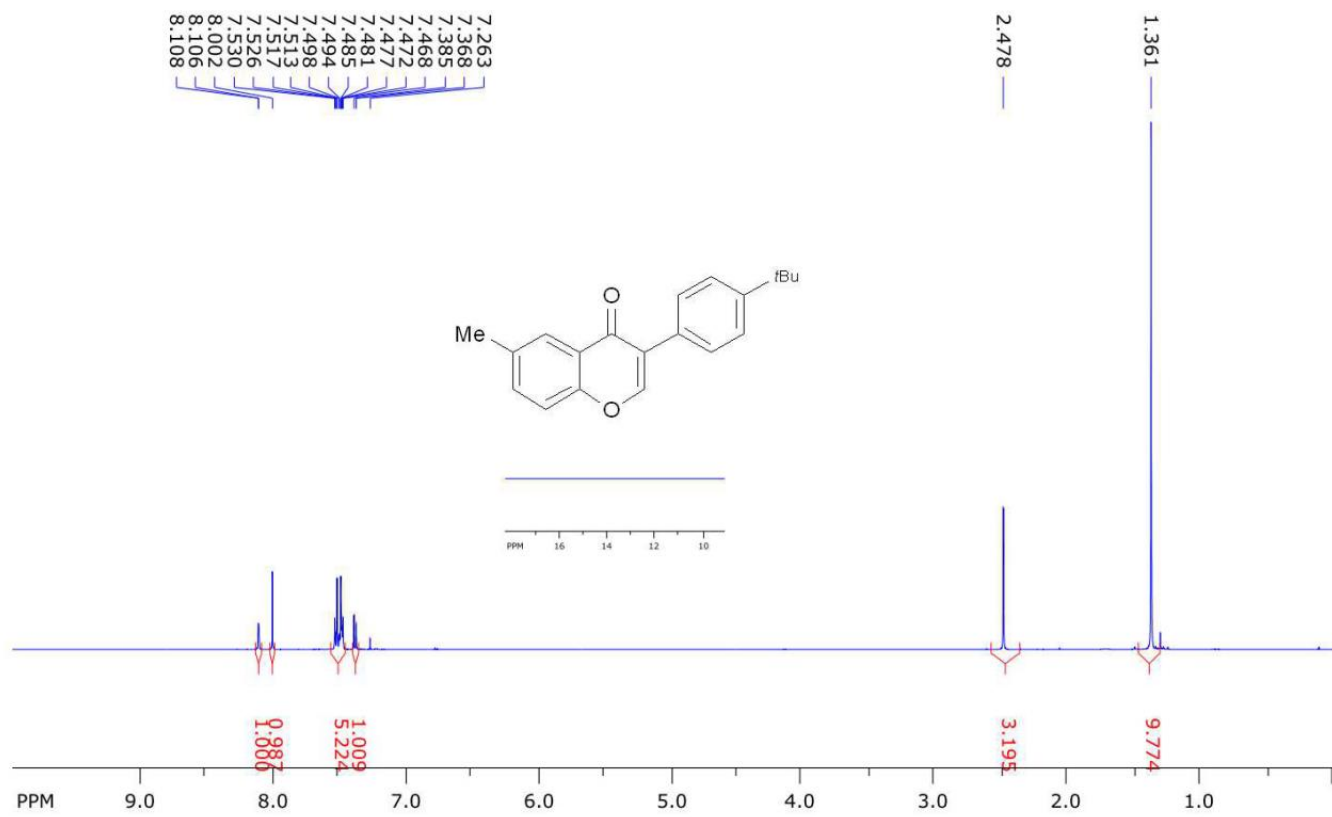

file: D:\NAPO\NMR\500-2\mkr12103\13\fid expt: <zg30>  
 transmitter freq.: 500.133001 MHz  
 time domain size: 65536 points  
 width: 12335.53 Hz = 24.6645 ppm = 0.188225 Hz/pt  
 number of scans: 24

freq. of 0 ppm: 500.130022 MHz  
 processed size: 65536 complex points  
 LB: 0.300 GF: 0.0000  
 Hz/cm: 200.316 ppm/cm: 0.40053

# Compound 4bd

SpinWorks 4: ISM 131 13C

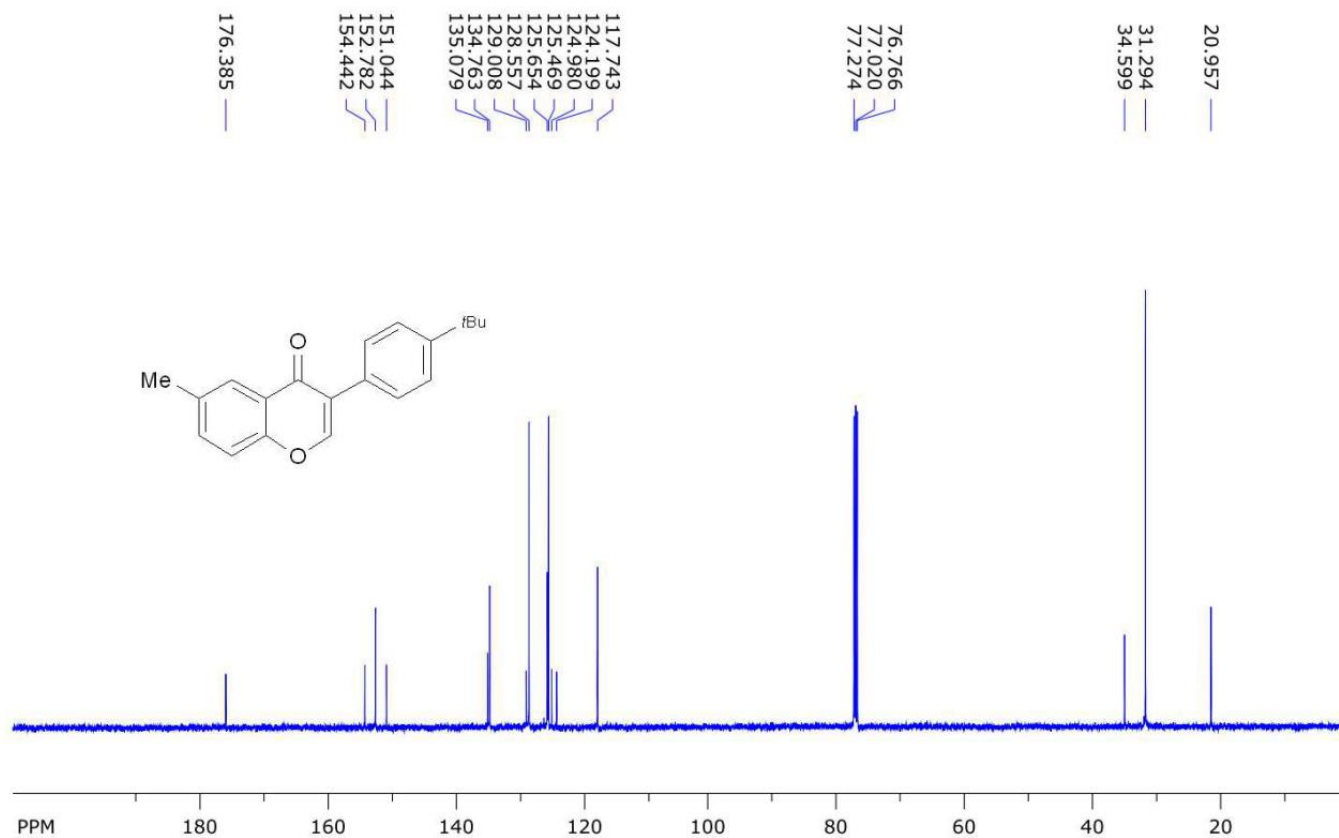

file: D:\NAPO\NMR\500-2\mkr12103\14\fid expt: <zpgg30>  
 transmitter freq.: 125.772879 MHz  
 time domain size: 65536 points  
 width: 36057.69 Hz = 286.6889 ppm = 0.550197 Hz/pt  
 number of scans: 512

freq. of 0 ppm: 125.757797 MHz  
 processed size: 32768 complex points  
 LB: 2.000 GF: 0.0000  
 Hz/cm: 1056.203 ppm/cm: 8.39770

# Compound 4be

SpinWorks 4: ISM 19 1H

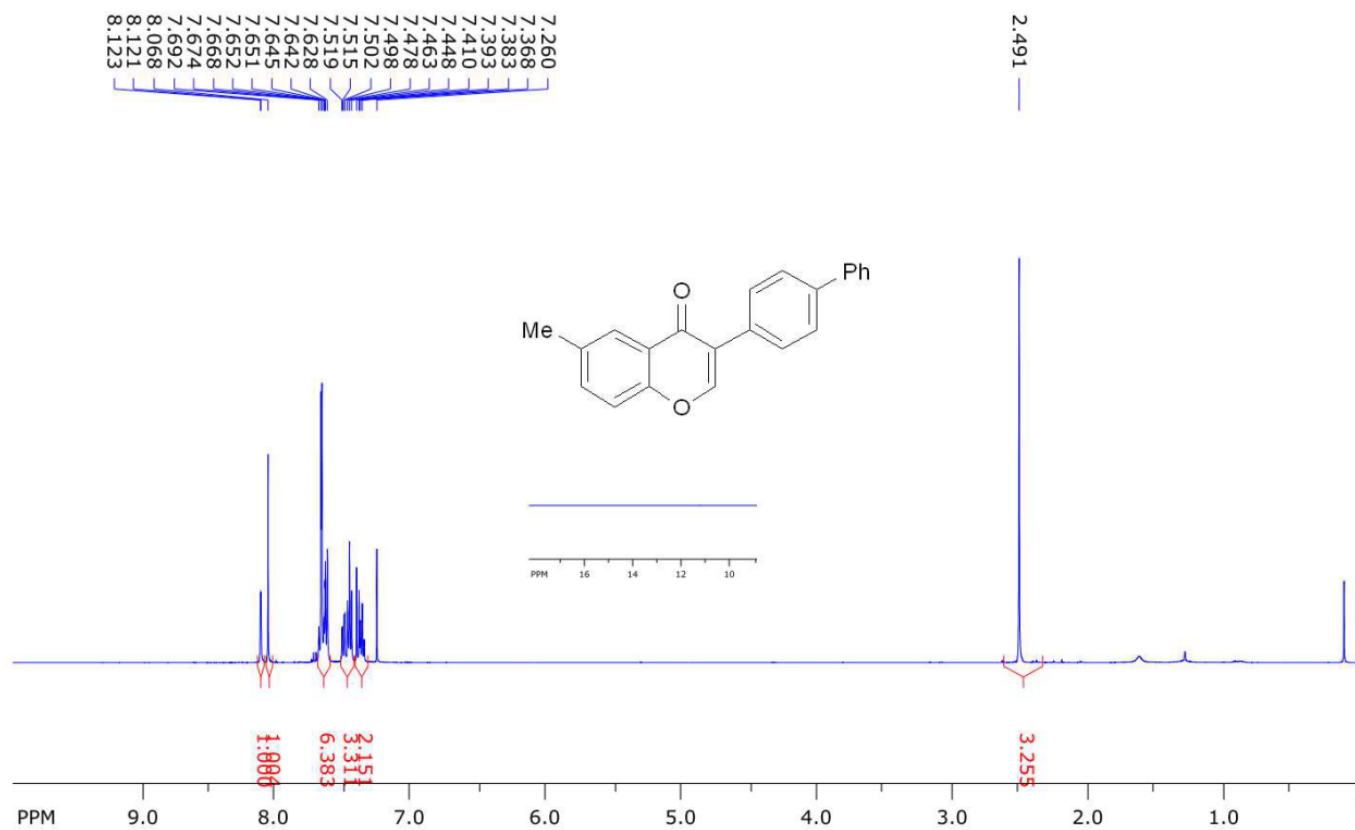

file: D:\NAPO\NMR\500-1\mkr10602\5\fid exp: <zg30>  
 transmitter freq.: 500.133001 MHz  
 time domain size: 65536 points  
 width: 12335.53 Hz = 24.6645 ppm = 0.188225 Hz/pt  
 number of scans: 24

freq. of 0 ppm: 500.130023 MHz  
 processed size: 65536 complex points  
 LB: 0.300 GF: 0.0000  
 Hz/cm: 200.862 ppm/cm: 0.40162

# Compound 4be

SpinWorks 4: ISM 19 13C

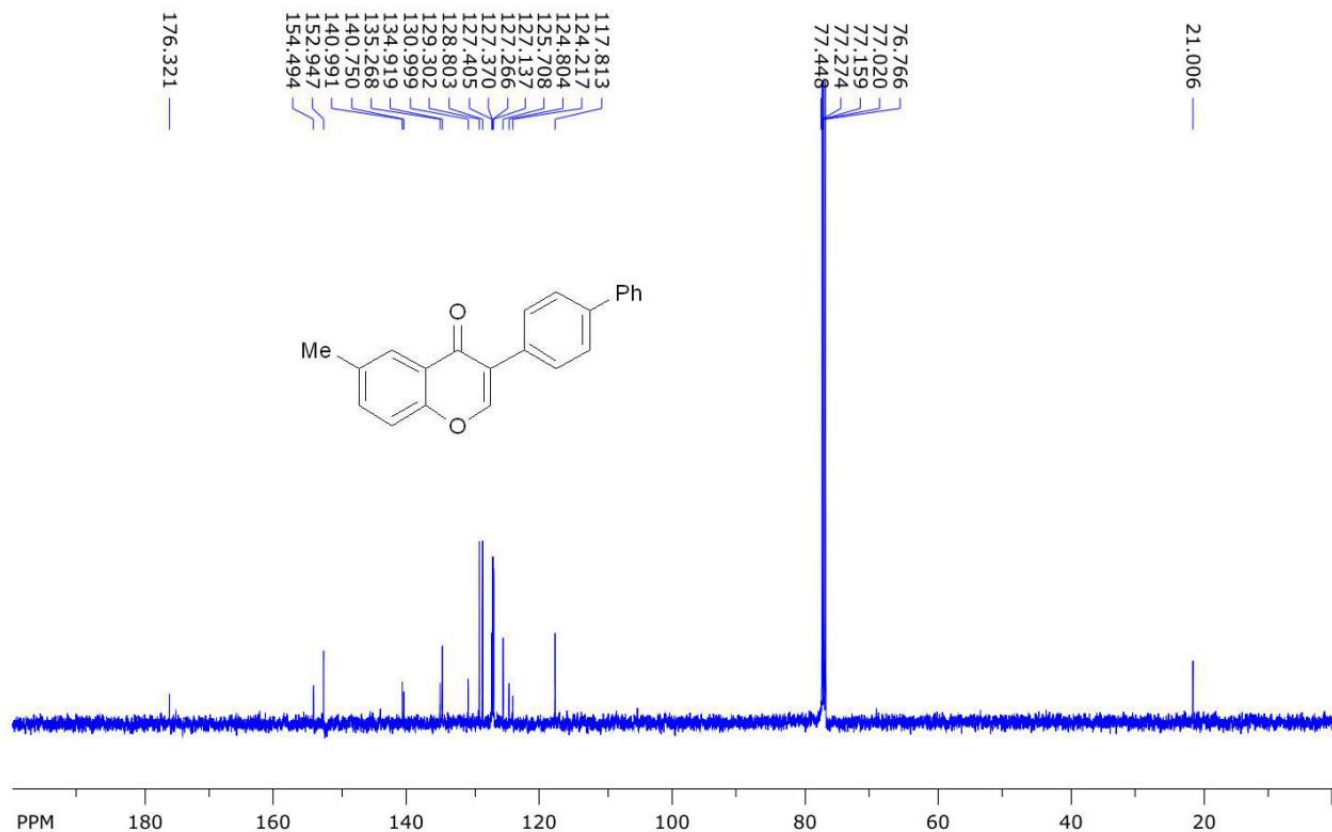

file: D:\NAPO\NMR\500-1\mkr10602\6\fid expt: <zpgg30>  
 transmitter freq.: 125.772879 MHz  
 time domain size: 65536 points  
 width: 36057.69 Hz = 286.6889 ppm = 0.550197 Hz/pt  
 number of scans: 256

freq. of 0 ppm: 125.757793 MHz  
 processed size: 32768 complex points  
 LB: 2.000 GF: 0.0000  
 Hz/cm: 1011.530 ppm/cm: 8.04251

# Compound 4bg

SpinWorks 4: ISM 14-1 1H

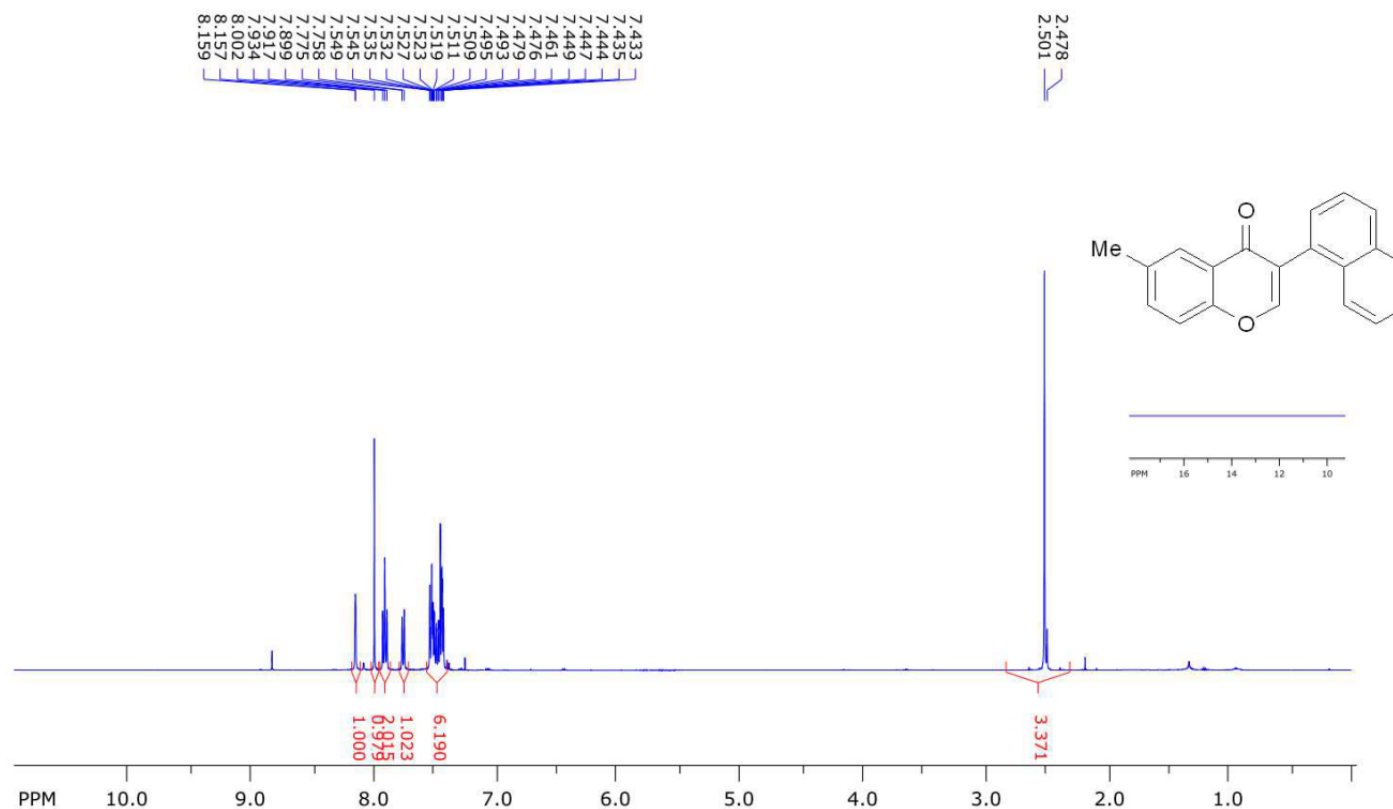

file: F:\Napo\NMR\500-1\mkr12301\7\fid expt: <zg30>  
 transmitter freq.: 500.133001 MHz  
 time domain size: 65536 points  
 width: 12335.53 Hz = 24.6645 ppm = 0.188225 Hz/pt  
 number of scans: 24

freq. of 0 ppm: 500.130024 MHz  
 processed size: 65536 complex points  
 LB: 0.300 GF: 0.0000  
 Hz/cm: 219.727 ppm/cm: 0.43934



# Compound 4bg

SpinWorks 4: ISM 14-1 13C

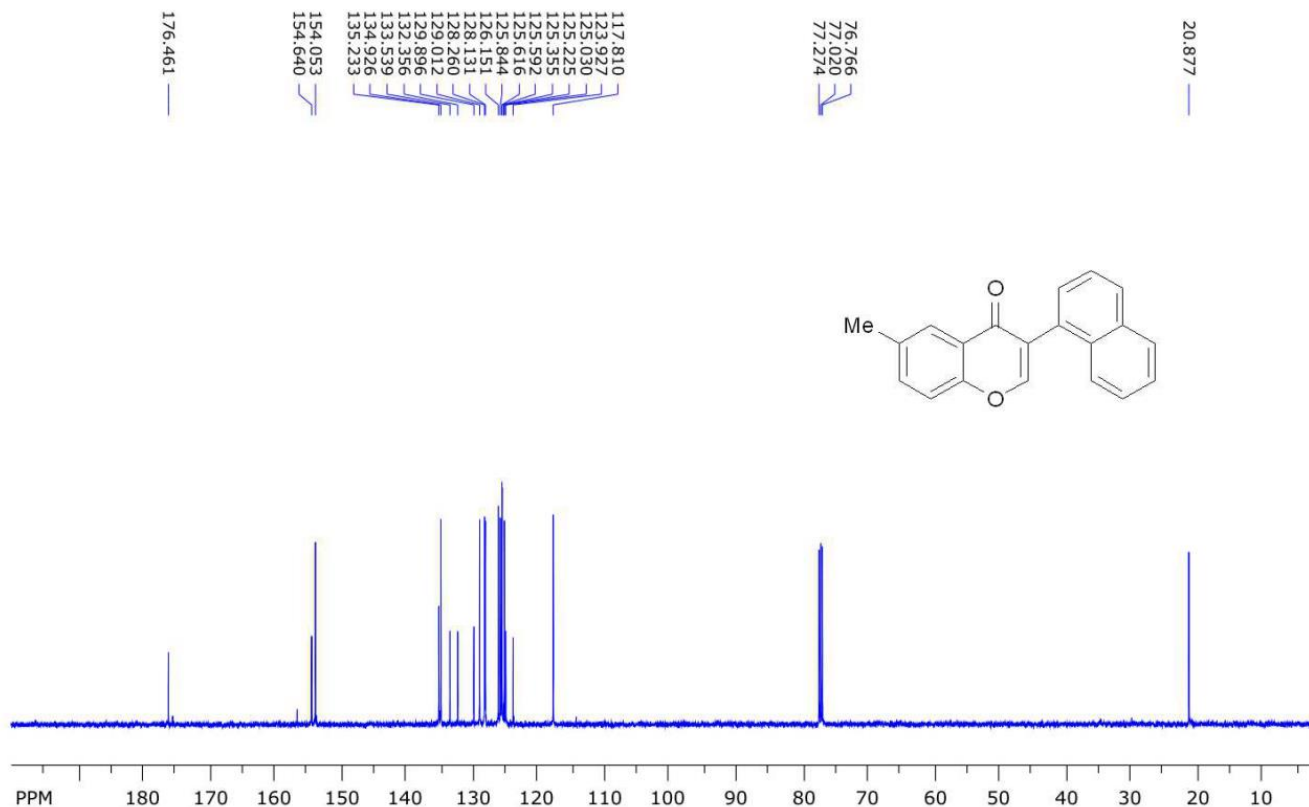

file: F:\Napo\NMR\500-1\mkr12301\8\fid expt: <zpgp30>  
 transmitter freq.: 125.772879 MHz  
 time domain size: 65536 points  
 width: 36057.69 Hz = 286.6889 ppm = 0.550197 Hz/pt  
 number of scans: 256

freq. of 0 ppm: 125.757813 MHz  
 processed size: 32768 complex points  
 LB: 2.000 GF: 0.0000  
 Hz/cm: 1002.855 ppm/cm: 7.97354

# Compound 4bu

SpinWorks 4: ISM 20-3 1H

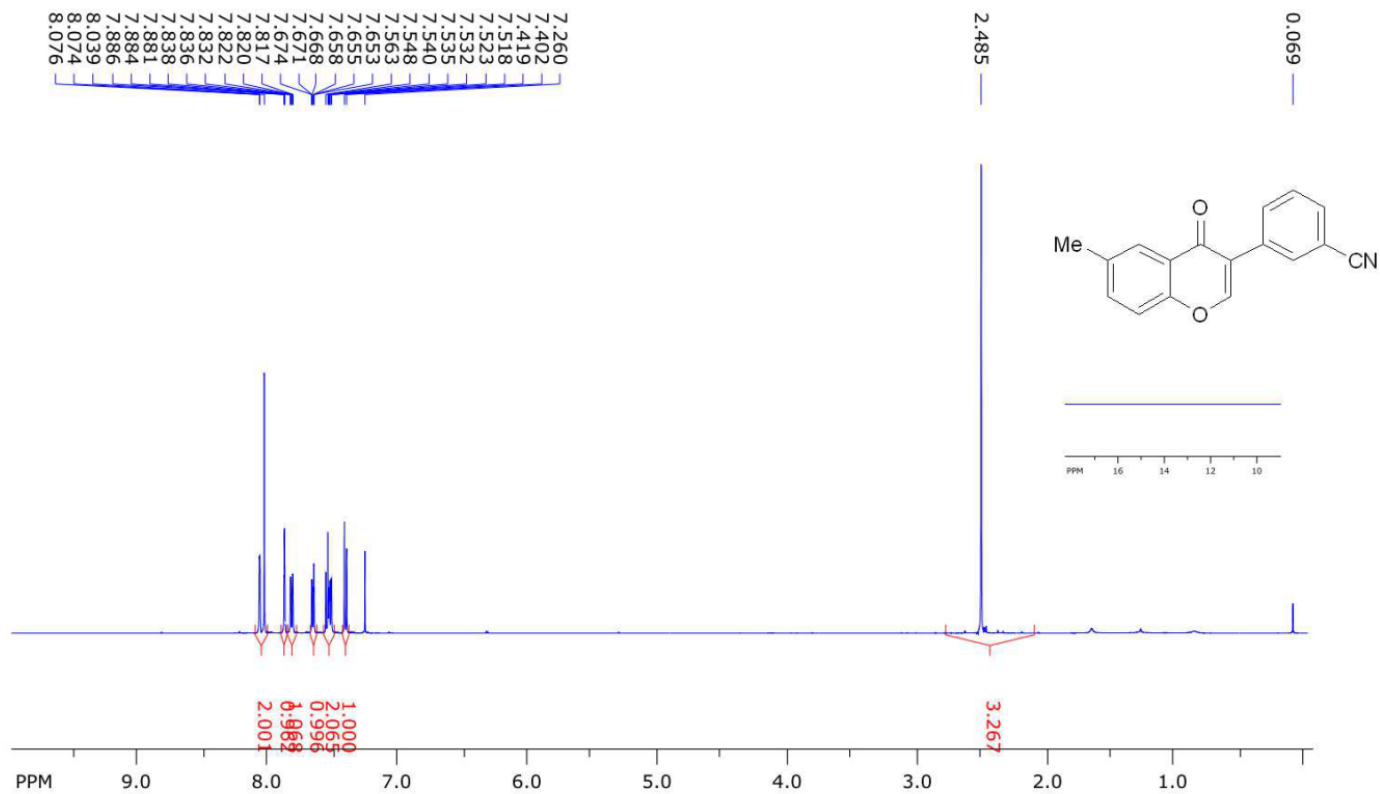

file: F:\Napo\NMR\500-1\mkr12302\1\fid expt: <zg30>  
 transmitter freq.: 500.133001 MHz  
 time domain size: 65536 points  
 width: 12335.53 Hz = 24.6645 ppm = 0.188225 Hz/pt  
 number of scans: 24

freq. of 0 ppm: 500.130023 MHz  
 processed size: 65536 complex points  
 LB: 0.300 GF: 0.0000  
 Hz/cm: 201.003 ppm/cm: 0.40190

# Compound 4bu

SpinWorks 4: ISM 20-3 13C

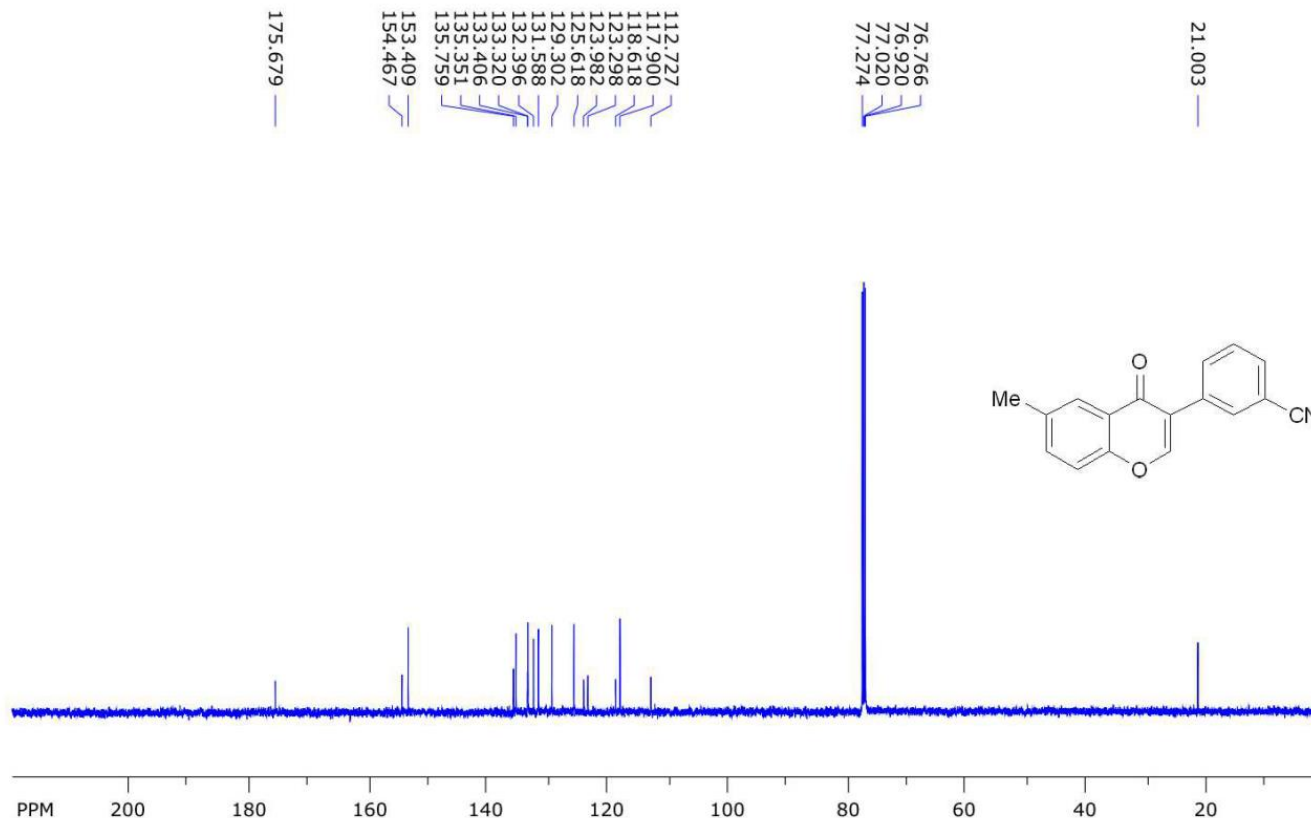

file: F:\Napo\NMR\500-1\mkr12302\2\fid expt: <zpgp30>  
 transmitter freq.: 125.772879 MHz  
 time domain size: 65536 points  
 width: 36057.69 Hz = 286.6889 ppm = 0.550197 Hz/pt  
 number of scans: 256

freq. of 0 ppm: 125.757794 MHz  
 processed size: 32768 complex points  
 LB: 2.000 GF: 0.0000  
 Hz/cm: 1104.267 ppm/cm: 8.77985

# Compound 4ch

SpinWorks 4: ISM 100 1H

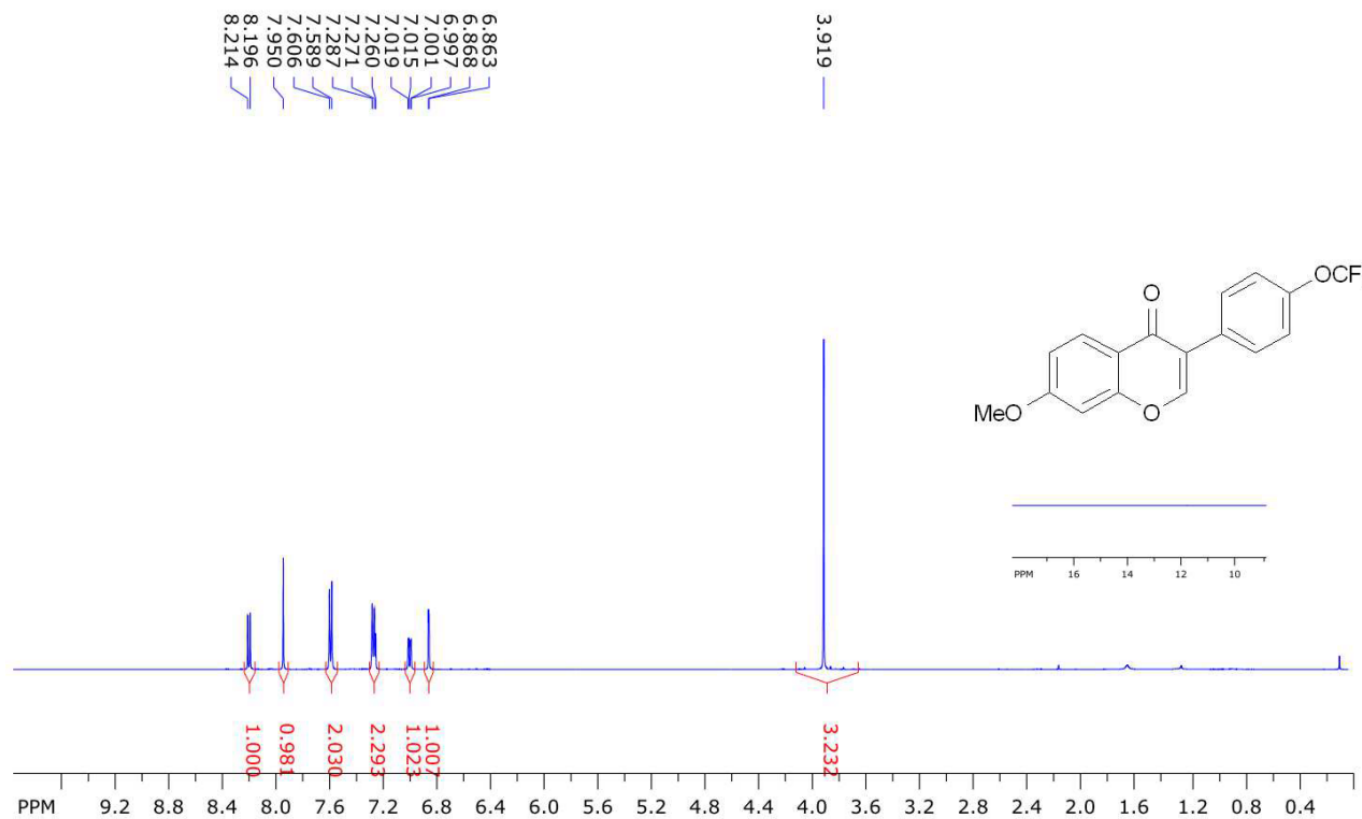

file: D:\NAPO\NMR\500-1\mkr12611\29\fid expt: <zg30>  
 transmitter freq.: 500.133001 MHz  
 time domain size: 65536 points  
 width: 12335.53 Hz = 24.6645 ppm = 0.188225 Hz/pt  
 number of scans: 24

freq. of 0 ppm: 500.130023 MHz  
 processed size: 65536 complex points  
 LB: 0.300 GF: 0.0000  
 Hz/cm: 199.224 ppm/cm: 0.39834

# Compound 4ch

SpinWorks 4: ISM 100 13C

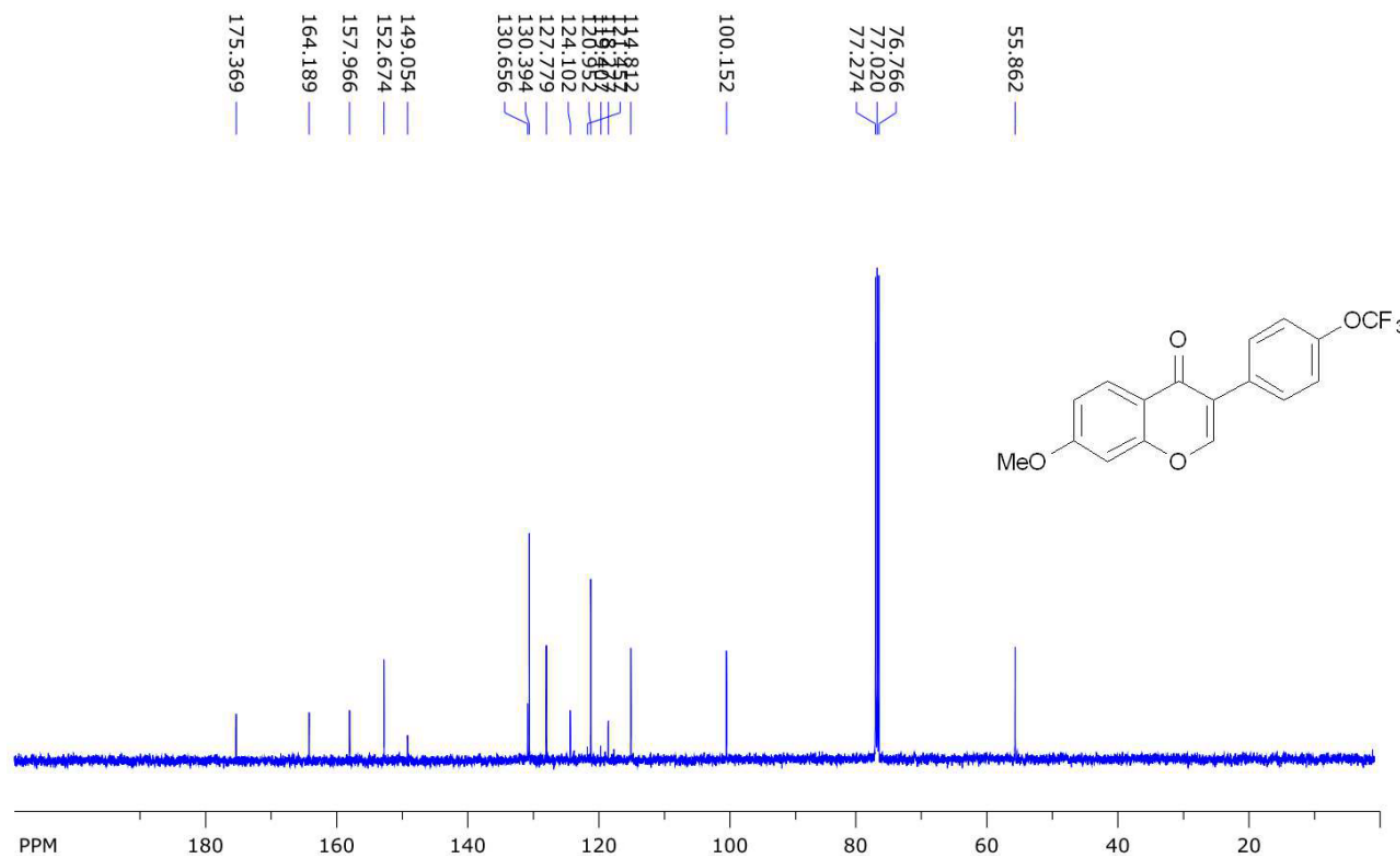

file: D:\NAPO\NMR\500-1\mkr12611\30\fid expt: <zgpg30>  
 transmitter freq.: 125.772879 MHz  
 time domain size: 65536 points  
 width: 36057.69 Hz = 286.6889 ppm = 0.550197 Hz/pt  
 number of scans: 256

freq. of 0 ppm: 125.757792 MHz  
 processed size: 32768 complex points  
 LB: 2.000 GF: 0.0000  
 Hz/cm: 1049.821 ppm/cm: 8.34696

# Compound 4ci

SpinWorks 4: ISM 67

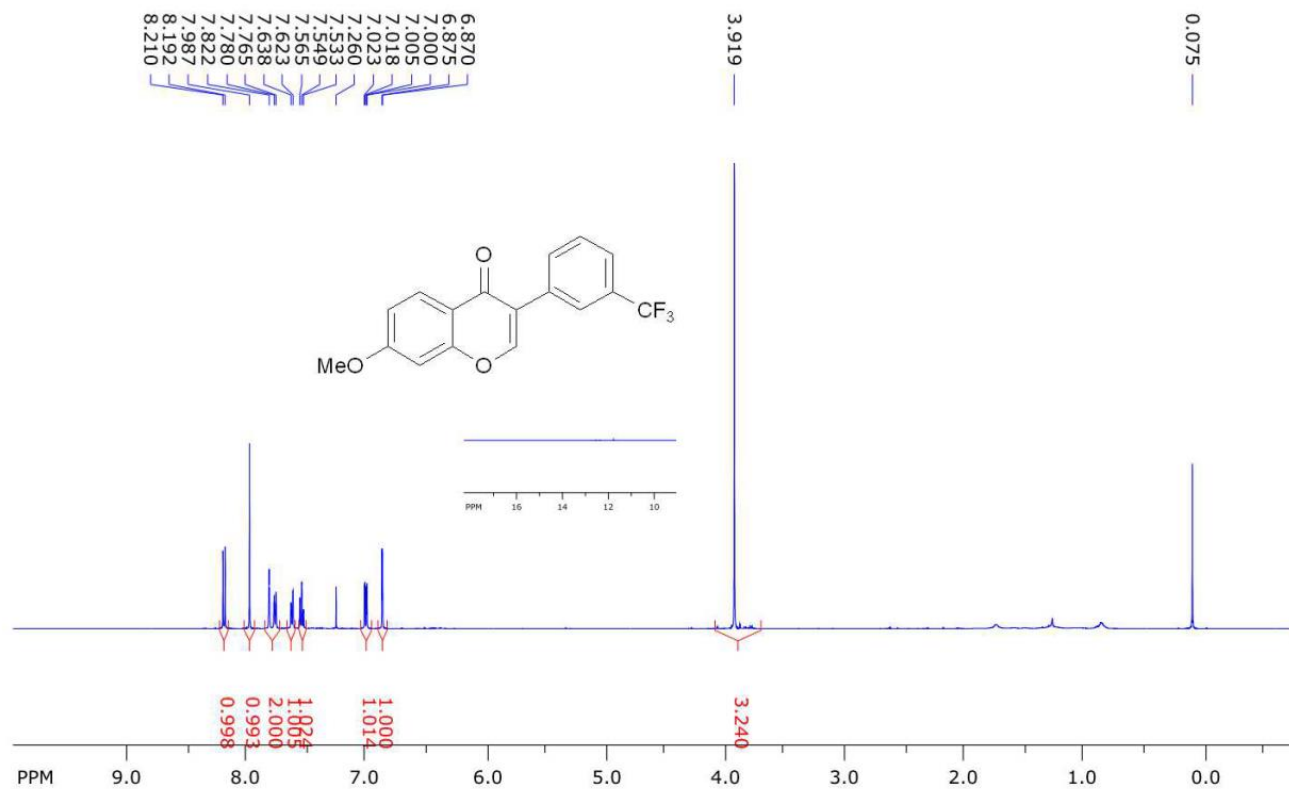

file: F:\Napo\NMR\500-1\mkr12706\27\fid expt: <zg30>  
 transmitter freq.: 500.133001 MHz  
 time domain size: 65536 points  
 width: 12335.53 Hz = 24.6645 ppm = 0.188225 Hz/pt  
 number of scans: 24

freq. of 0 ppm: 500.130023 MHz  
 processed size: 65536 complex points  
 LB: 0.300 GF: 0.0000  
 Hz/cm: 215.872 ppm/cm: 0.43163

# Compound 4ci

SpinWorks 4: ISM 67

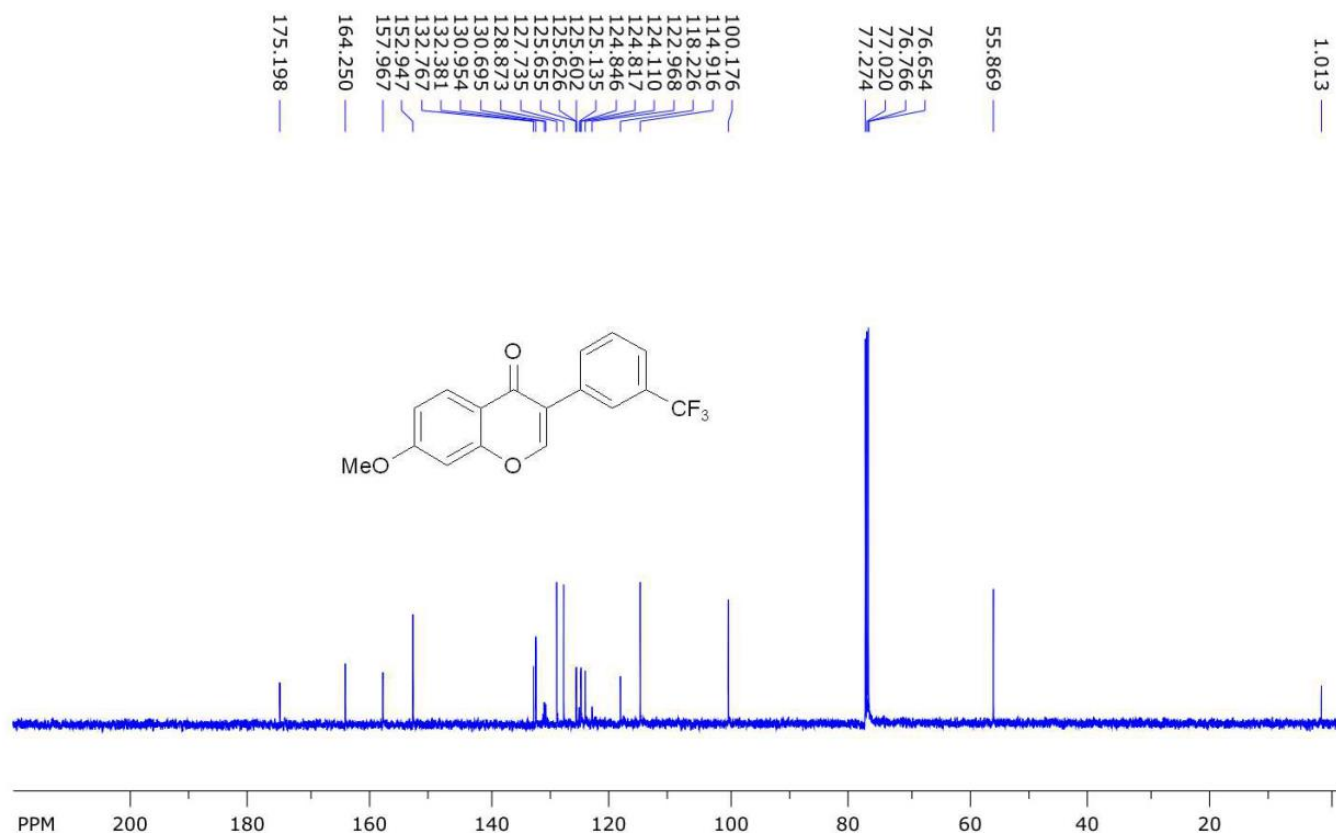

file: F:\Napo\NMR\500-1\mkr12706\28\fid expt: <zpgg30>  
 transmitter freq.: 125.772879 MHz  
 time domain size: 65536 points  
 width: 36057.69 Hz = 286.6889 ppm = 0.550197 Hz/pt  
 number of scans: 270

freq. of 0 ppm: 125.757793 MHz  
 processed size: 32768 complex points  
 LB: 2.000 GF: 0.0000  
 Hz/cm: 1113.925 ppm/cm: 8.85664

# Compound 4cp

SpinWorks 4: ISM 69

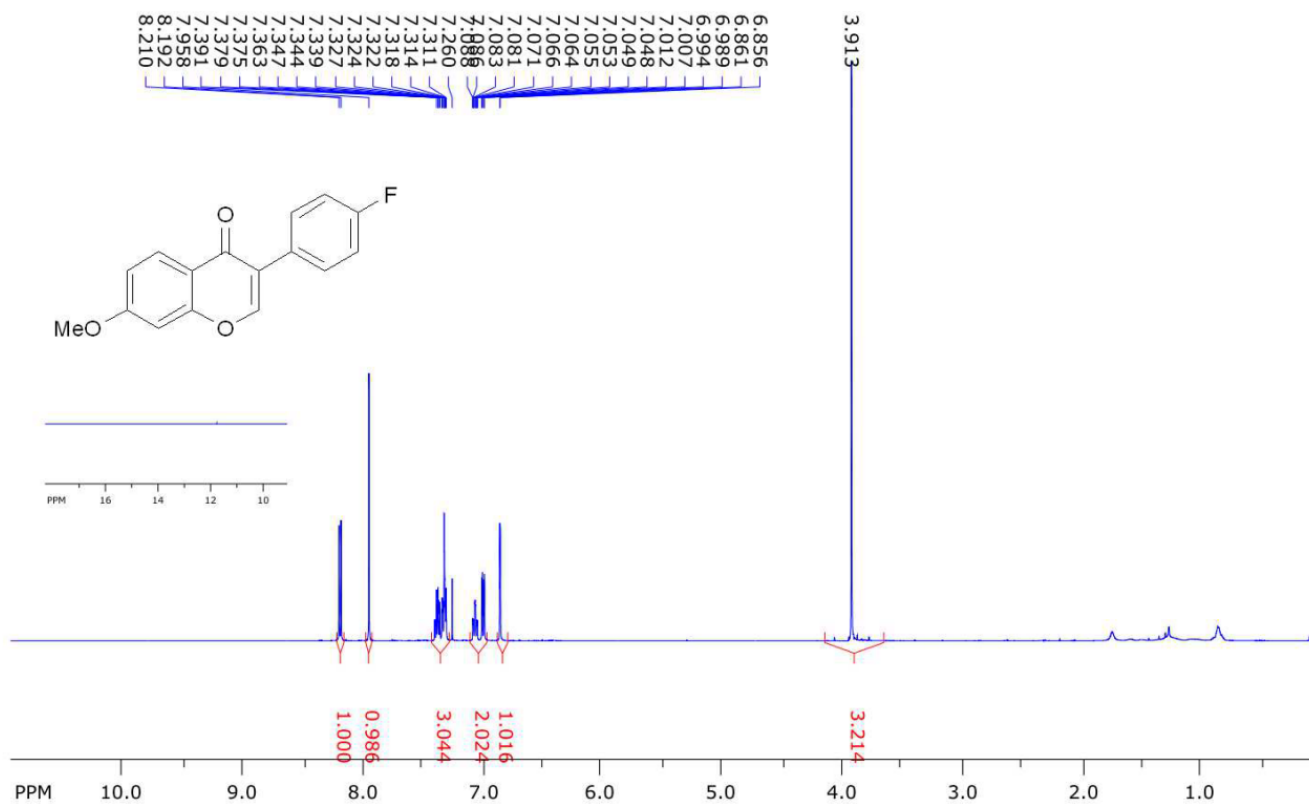

file: F:\Napo\NMR\500-1\mkr12706\19\fid expt: <zg30>  
 transmitter freq.: 500.133001 MHz  
 time domain size: 65536 points  
 width: 12335.53 Hz = 24.6645 ppm = 0.188225 Hz/pt  
 number of scans: 32

freq. of 0 ppm: 500.130023 MHz  
 processed size: 65536 complex points  
 LB: 0.300 GF: 0.0000  
 Hz/cm: 219.727 ppm/cm: 0.43934



# Compound 4cp

SpinWorks 4: ISM 69

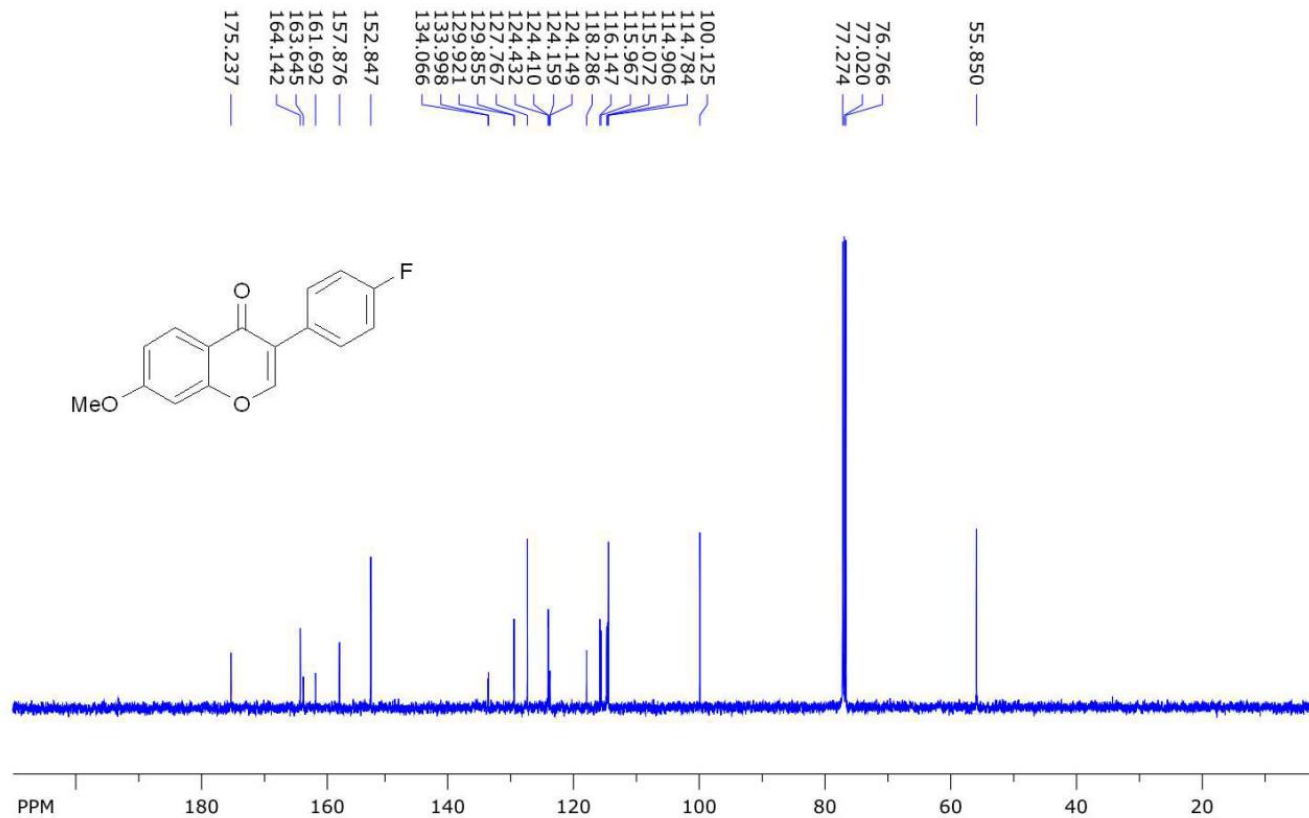

file: F:\Napo\NMR\500-1\mkr12706\20\fid expt: <zpgg30>  
 transmitter freq.: 125.772879 MHz  
 time domain size: 65536 points  
 width: 36057.69 Hz = 286.6889 ppm = 0.550197 Hz/pt  
 number of scans: 256

freq. of 0 ppm: 125.757795 MHz  
 processed size: 32768 complex points  
 LB: 2.000 GF: 0.0000  
 Hz/cm: 1051.146 ppm/cm: 8.35749

# Compound 4db

SpinWorks 4: ISM 98-1 1H

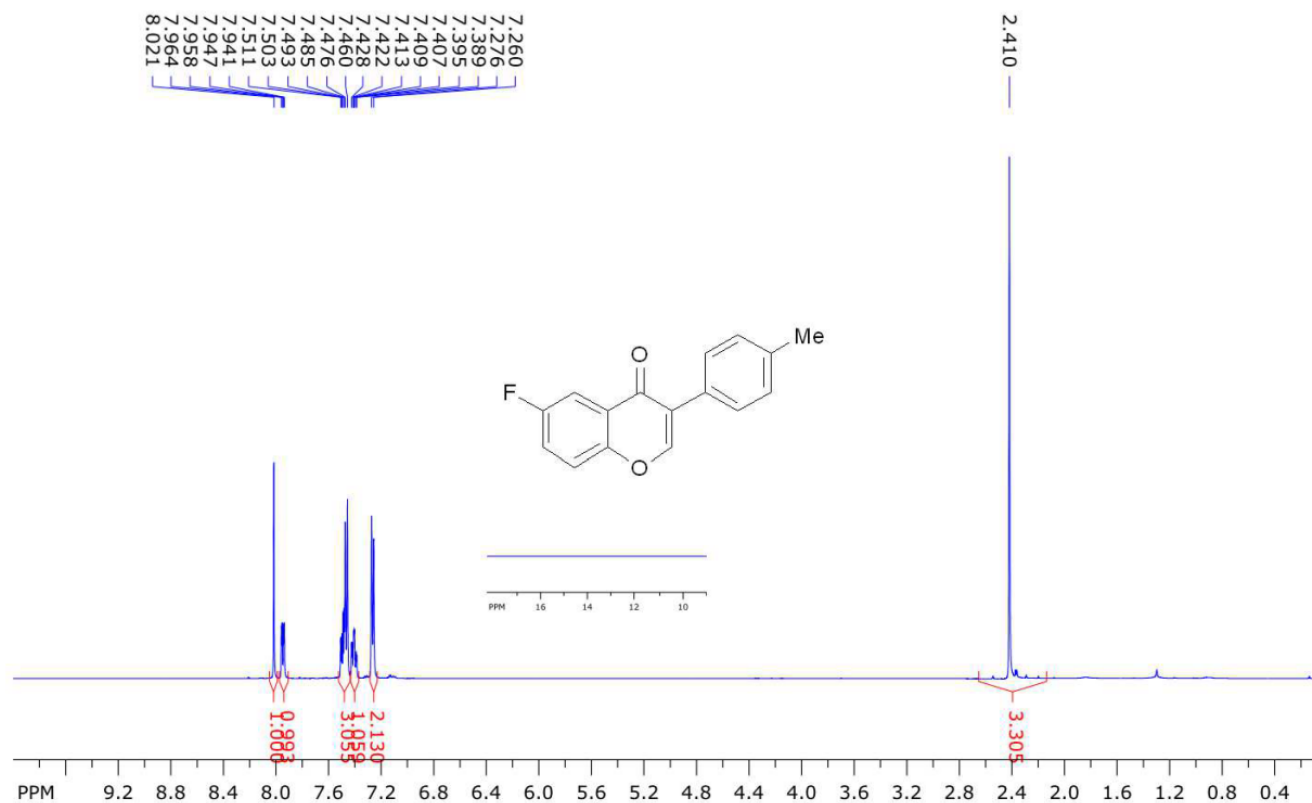

file: D:\NAPO\NMR\500-1\mkr12611\25\fid expt: <zg30>  
 transmitter freq.: 500.133001 MHz  
 time domain size: 65536 points  
 width: 12335.53 Hz = 24.6645 ppm = 0.188225 Hz/pt  
 number of scans: 24

freq. of 0 ppm: 500.130014 MHz  
 processed size: 65536 complex points  
 LB: 0.300 GF: 0.0000  
 Hz/cm: 199.770 ppm/cm: 0.39943

# Compound 4db

SpinWorks 4: ISM 98-1 13C

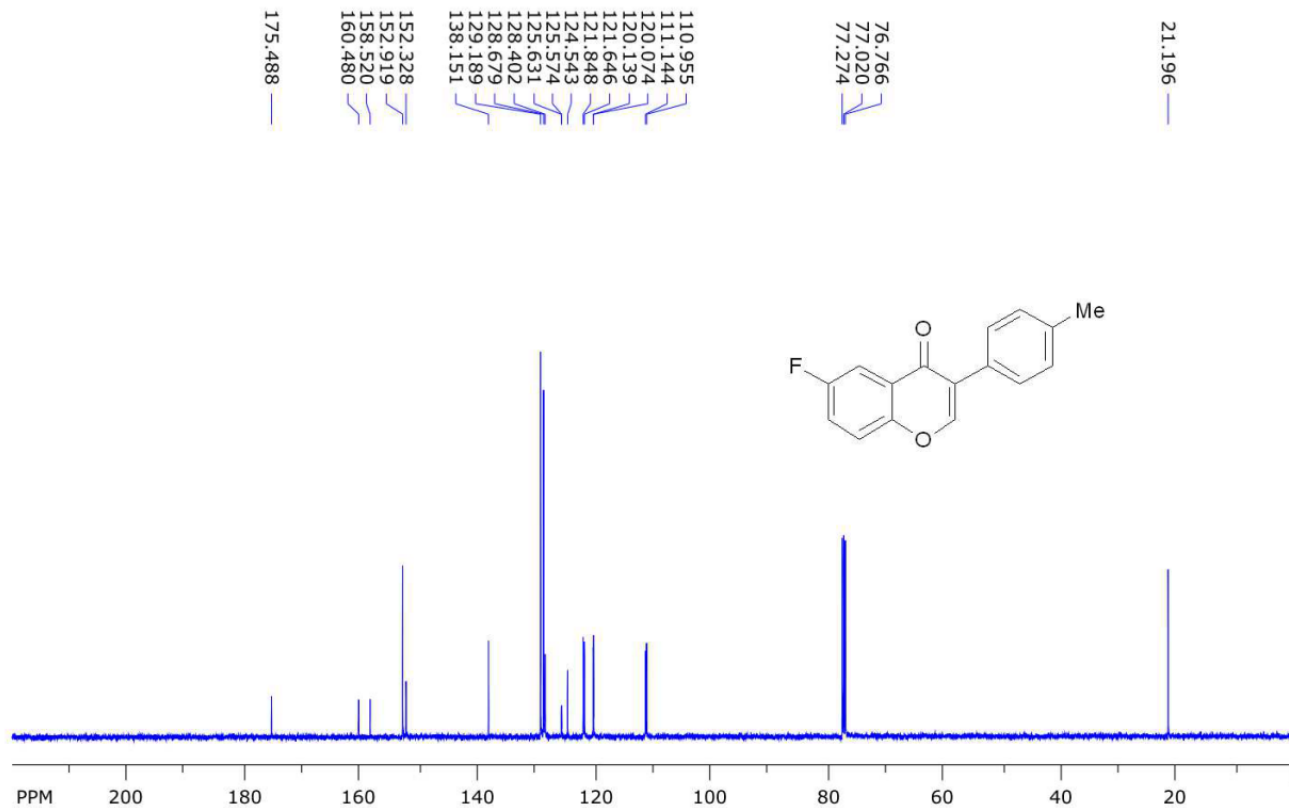

file: D:\NAPO\NMR\500-1\mkr12611\26\fid expt: <zpgpg30>  
 transmitter freq.: 125.772879 MHz  
 time domain size: 65536 points  
 width: 36057.69 Hz = 286.6889 ppm = 0.550197 Hz/pt  
 number of scans: 256

freq. of 0 ppm: 125.757802 MHz  
 processed size: 32768 complex points  
 LB: 2.000 GF: 0.0000  
 Hz/cm: 1113.640 ppm/cm: 8.85437

# Compound 4dl

SpinWorks 4: ISM 104 1H

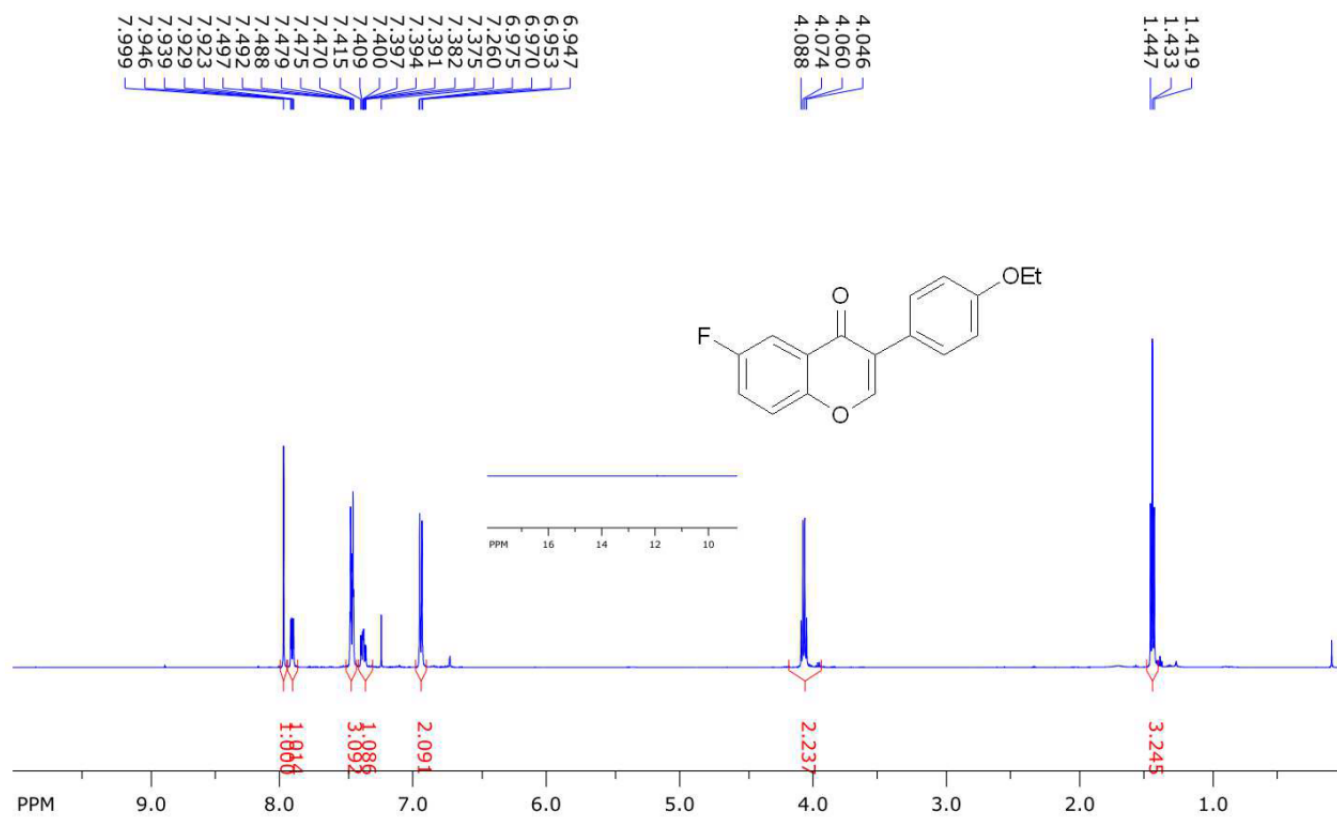

file: D:\NAPO\NMR\500-2\mkr11412\25\fid expt: <zg30>  
 transmitter freq.: 500.133001 MHz  
 time domain size: 65536 points  
 width: 12335.53 Hz = 24.6645 ppm = 0.188225 Hz/pt  
 number of scans: 24

freq. of 0 ppm: 500.130023 MHz  
 processed size: 65536 complex points  
 LB: 0.300 GF: 0.0000  
 Hz/cm: 200.862 ppm/cm: 0.40162

# Compound 4dl

SpinWorks 4: ISM 104 13C

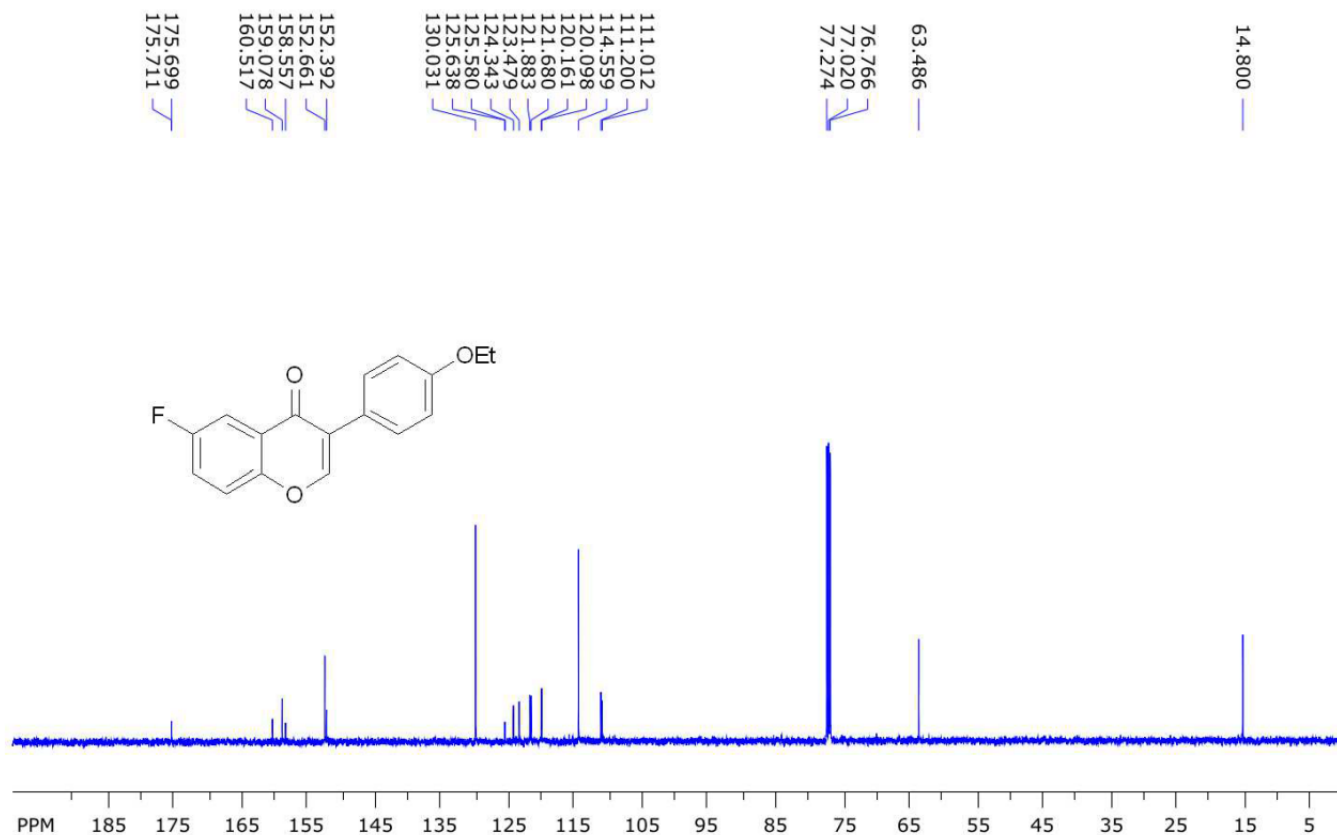

file: D:\NAPO\NMR\500-2\mkr11412\26\fid expt: <zgpg30>  
 transmitter freq.: 125.772879 MHz  
 time domain size: 65536 points  
 width: 36057.69 Hz = 286.6889 ppm = 0.550197 Hz/pt  
 number of scans: 256

freq. of 0 ppm: 125.757795 MHz  
 processed size: 32768 complex points  
 LB: 2.000 GF: 0.0000  
 Hz/cm: 1003.553 ppm/cm: 7.97909

# Compound 4dm

SpinWorks 4: ISM 107-1 1H

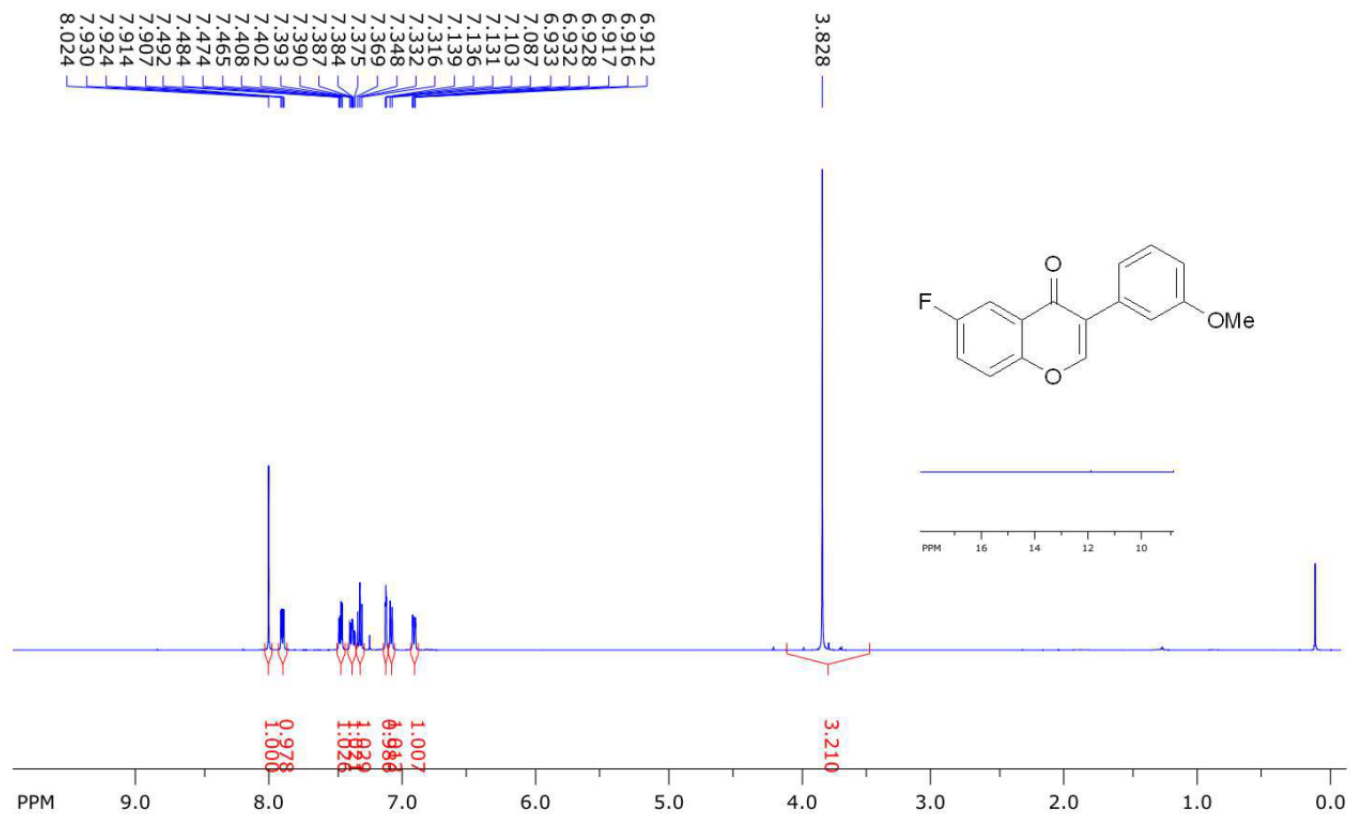

file: D:\NAPO\NMR\500-2\mkr11412\21\fid expt: <zg30>  
 transmitter freq.: 500.133001 MHz  
 time domain size: 65536 points  
 width: 12335.53 Hz = 24.6645 ppm = 0.188225 Hz/pt  
 number of scans: 24

freq. of 0 ppm: 500.130024 MHz  
 processed size: 65536 complex points  
 LB: 0.300 GF: 0.0000  
 Hz/cm: 201.407 ppm/cm: 0.40271

# Compound 4dm

SpinWorks 4: ISM 107-1 13C

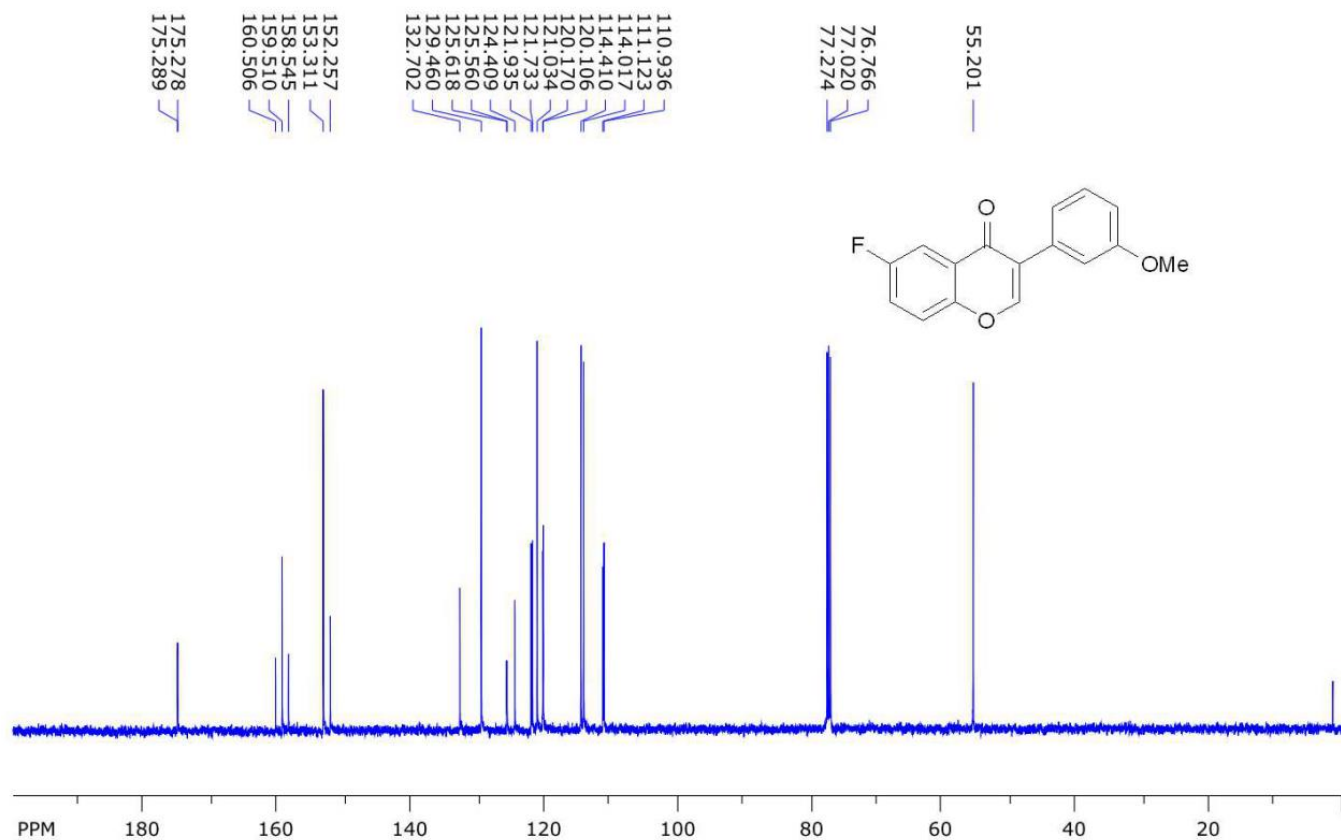

file: D:\NAPO\NMR\500-2\mkr11412\22\fid expt: <zgpg30>  
 transmitter freq.: 125.772879 MHz  
 time domain size: 65536 points  
 width: 36057.69 Hz = 286.6889 ppm = 0.550197 Hz/pt  
 number of scans: 256

freq. of 0 ppm: 125.757803 MHz  
 processed size: 32768 complex points  
 LB: 2.000 GF: 0.0000  
 Hz/cm: 1013.125 ppm/cm: 8.05520

# Compound 4dn

SpinWorks 4: ISM 111-1 1H

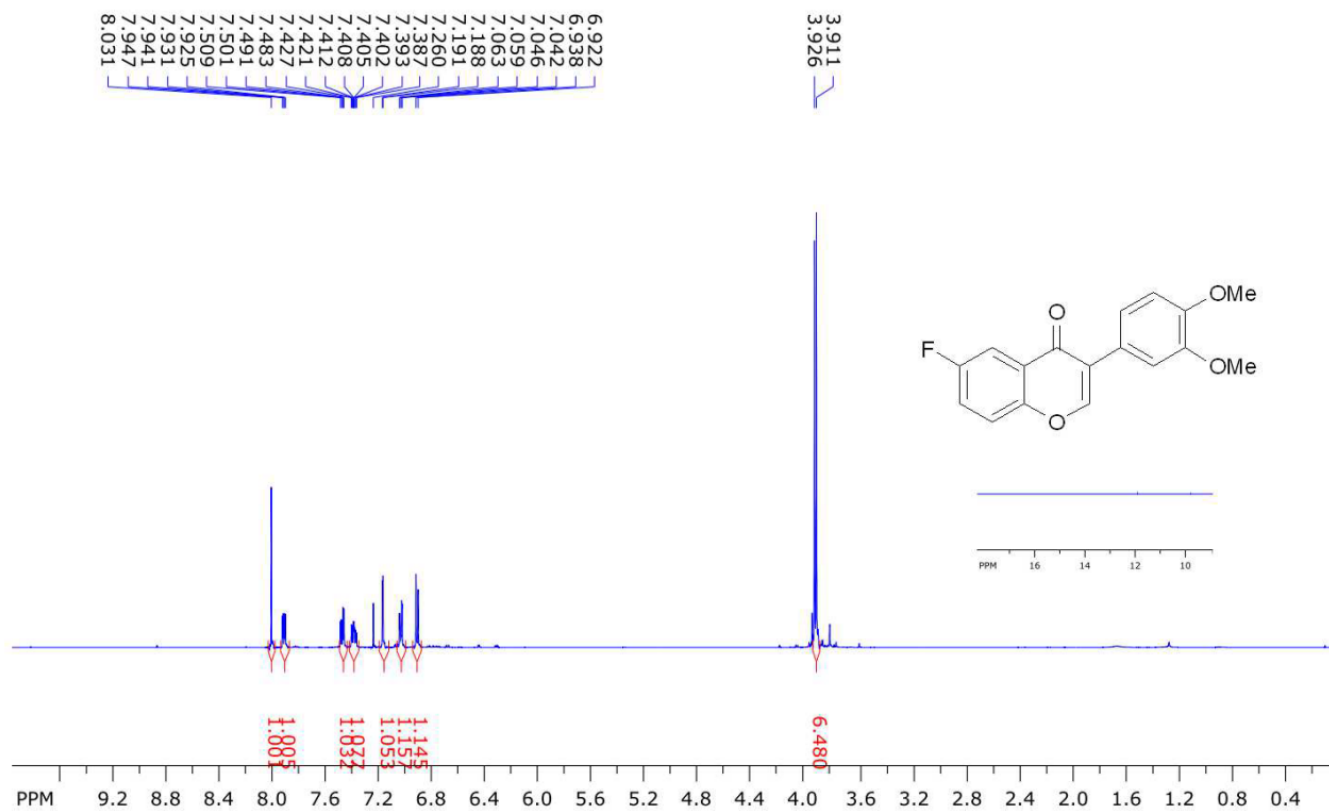

file: D:\NAPO\NMR\500-2\mkr10701\29\fid expt: <zg30>  
 transmitter freq.: 500.133001 MHz  
 time domain size: 65536 points  
 width: 12335.53 Hz = 24.6645 ppm = 0.188225 Hz/pt  
 number of scans: 16

freq. of 0 ppm: 500.130023 MHz  
 processed size: 65536 complex points  
 LB: 0.300 GF: 0.0000  
 Hz/cm: 199.770 ppm/cm: 0.39943



# Compound 4dn

SpinWorks 4: ISM 111-1 13C

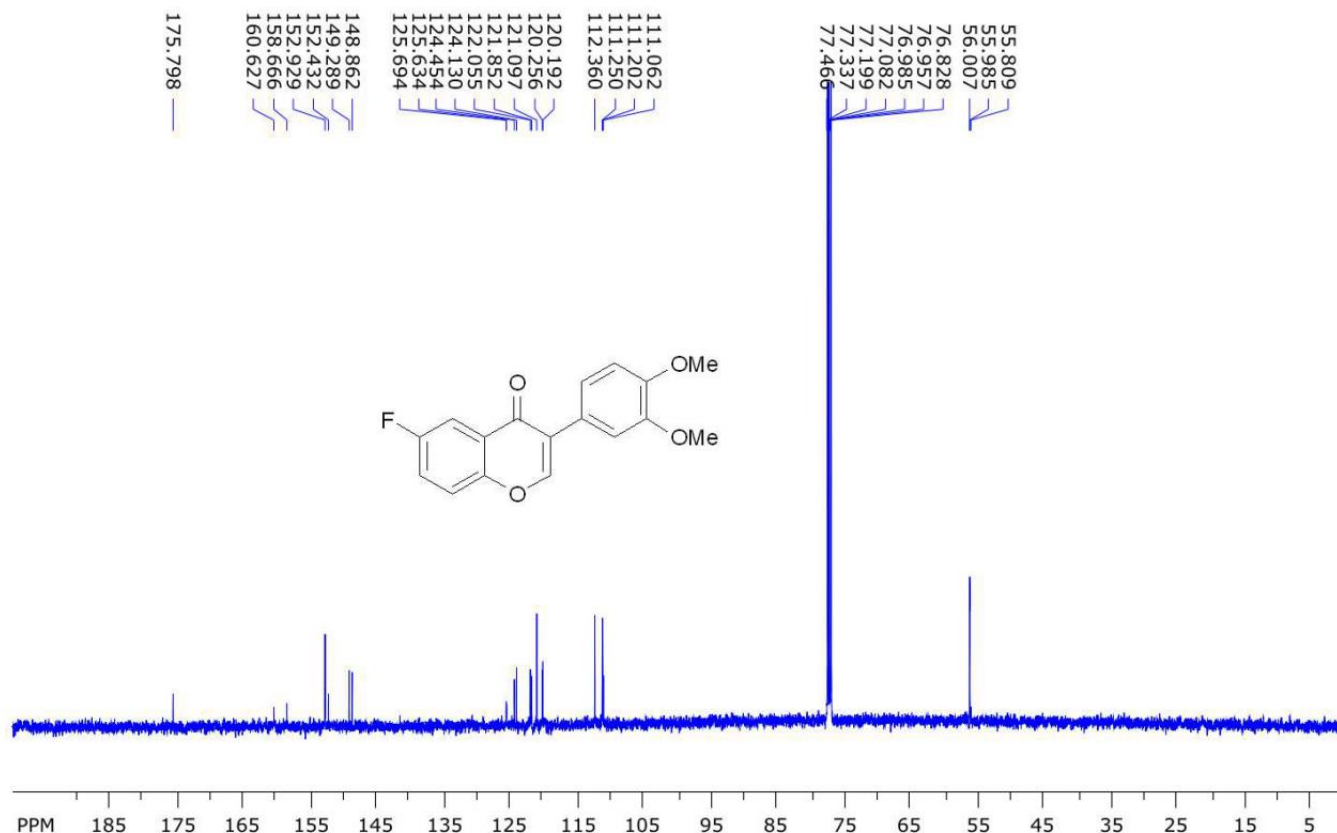

file: D:\NAPO\NMR\500-2\mkr10701\30\fid expt: <zgpg30>  
transmitter freq.: 125.772879 MHz  
time domain size: 65536 points  
width: 36057.69 Hz = 286.6889 ppm = 0.550197 Hz/pt  
number of scans: 512

freq. of 0 ppm: 125.757789 MHz  
processed size: 32768 complex points  
LB: 2.000 GF: 0.0000  
Hz/cm: 1005.148 ppm/cm: 7.99177

# Compound 4ef

SpinWorks 4: ISM 125 1H

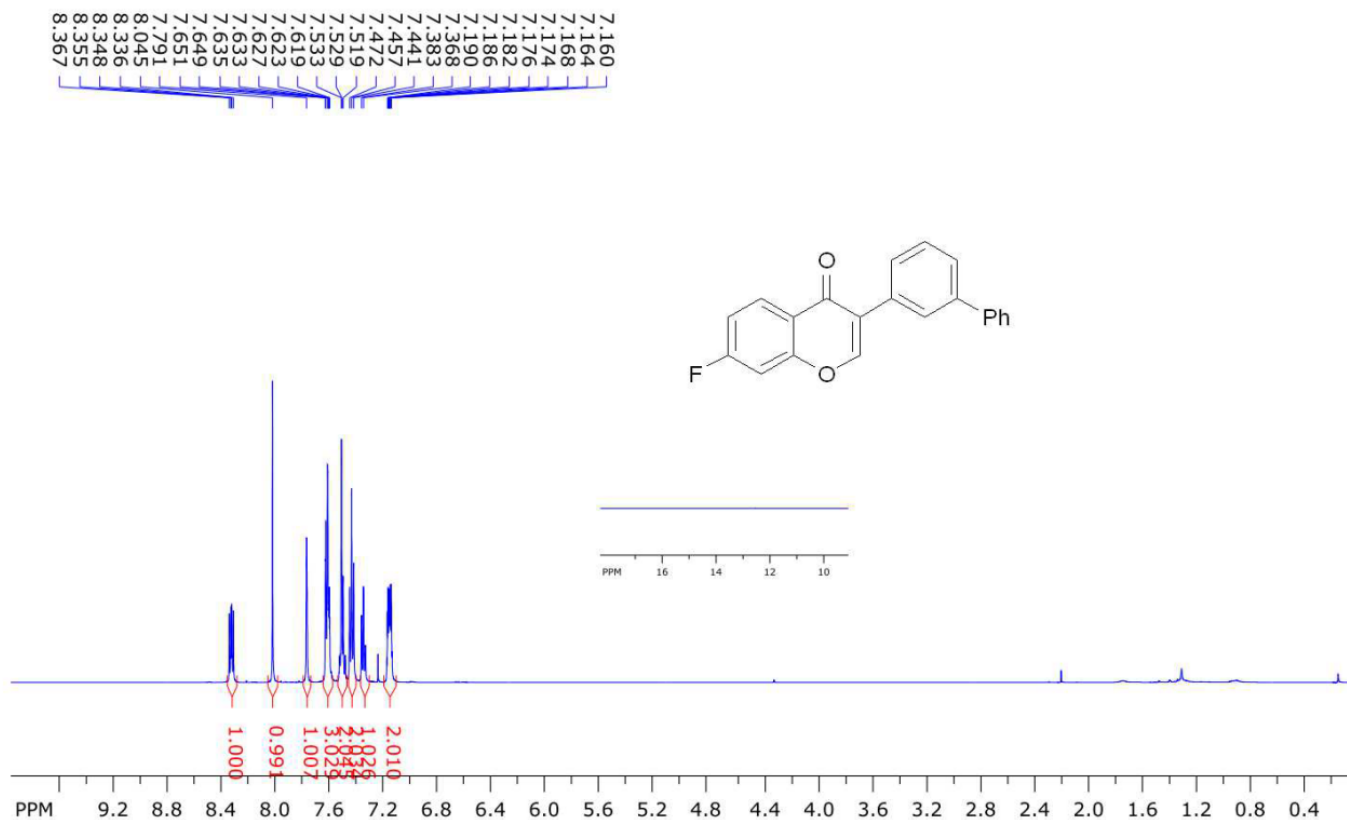

file: D:\NAPO\NMR\500-2\mkr12103\11\fid expt: <zg30>  
 transmitter freq.: 500.133001 MHz  
 time domain size: 65536 points  
 width: 12335.53 Hz = 24.6645 ppm = 0.188225 Hz/pt  
 number of scans: 24

freq. of 0 ppm: 500.130023 MHz  
 processed size: 65536 complex points  
 LB: 0.300 GF: 0.0000  
 Hz/cm: 199.770 ppm/cm: 0.39943

# Compound 4ef

SpinWorks 4: ISM 125 13C

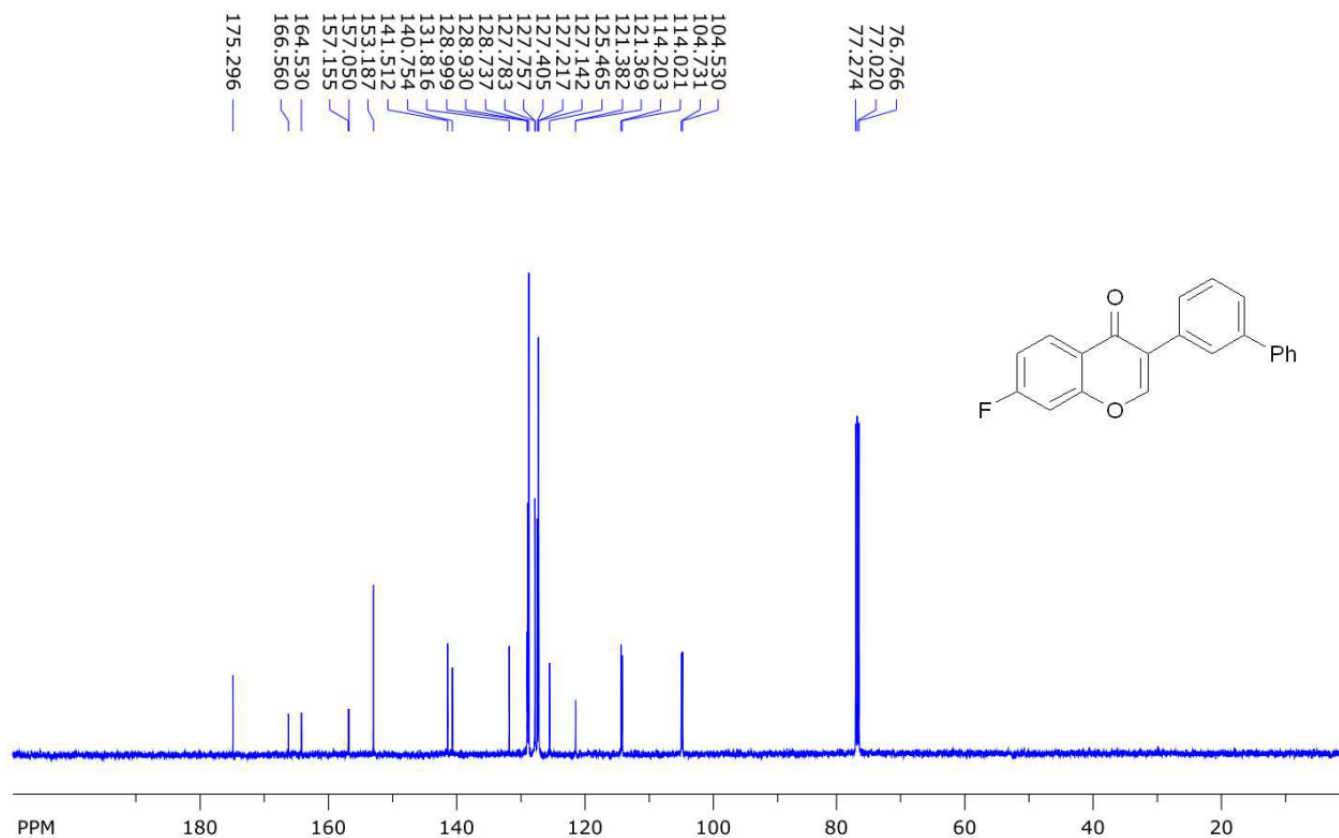

file: D:\NAPO\NMR\500-2\mkr12103\12\fid expt: <zgpg30>  
 transmitter freq.: 125.772879 MHz  
 time domain size: 65536 points  
 width: 36057.69 Hz = 286.6889 ppm = 0.550197 Hz/pt  
 number of scans: 512

freq. of 0 ppm: 125.757801 MHz  
 processed size: 32768 complex points  
 LB: 2.000 GF: 0.0000  
 Hz/cm: 1054.608 ppm/cm: 8.38502

# Compound 4fa

SpinWorks 4: ISM 72

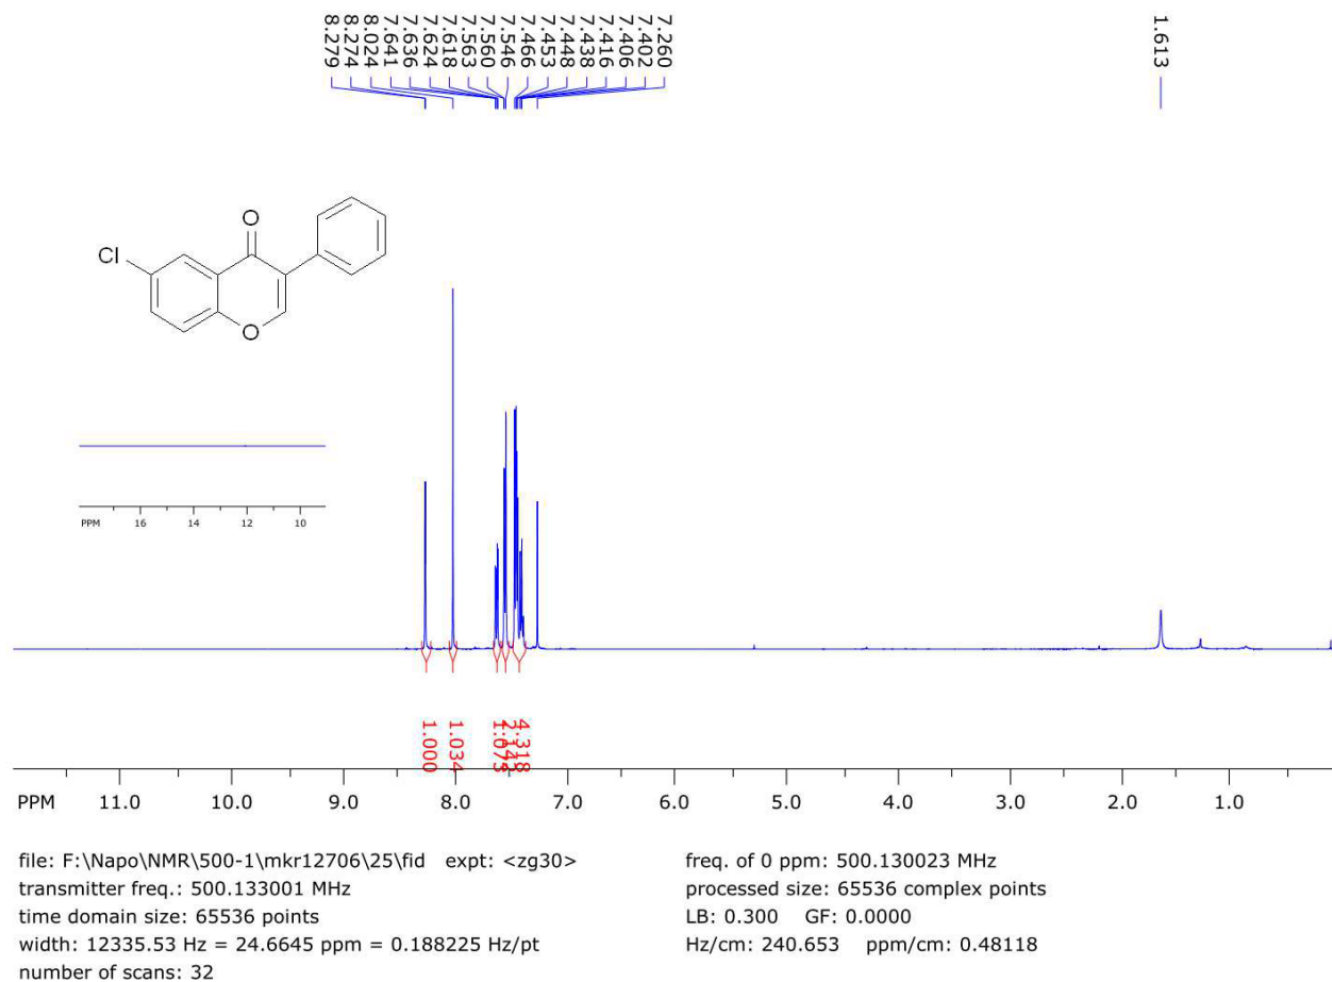

# Compound 4fa

SpinWorks 4: ISM 72

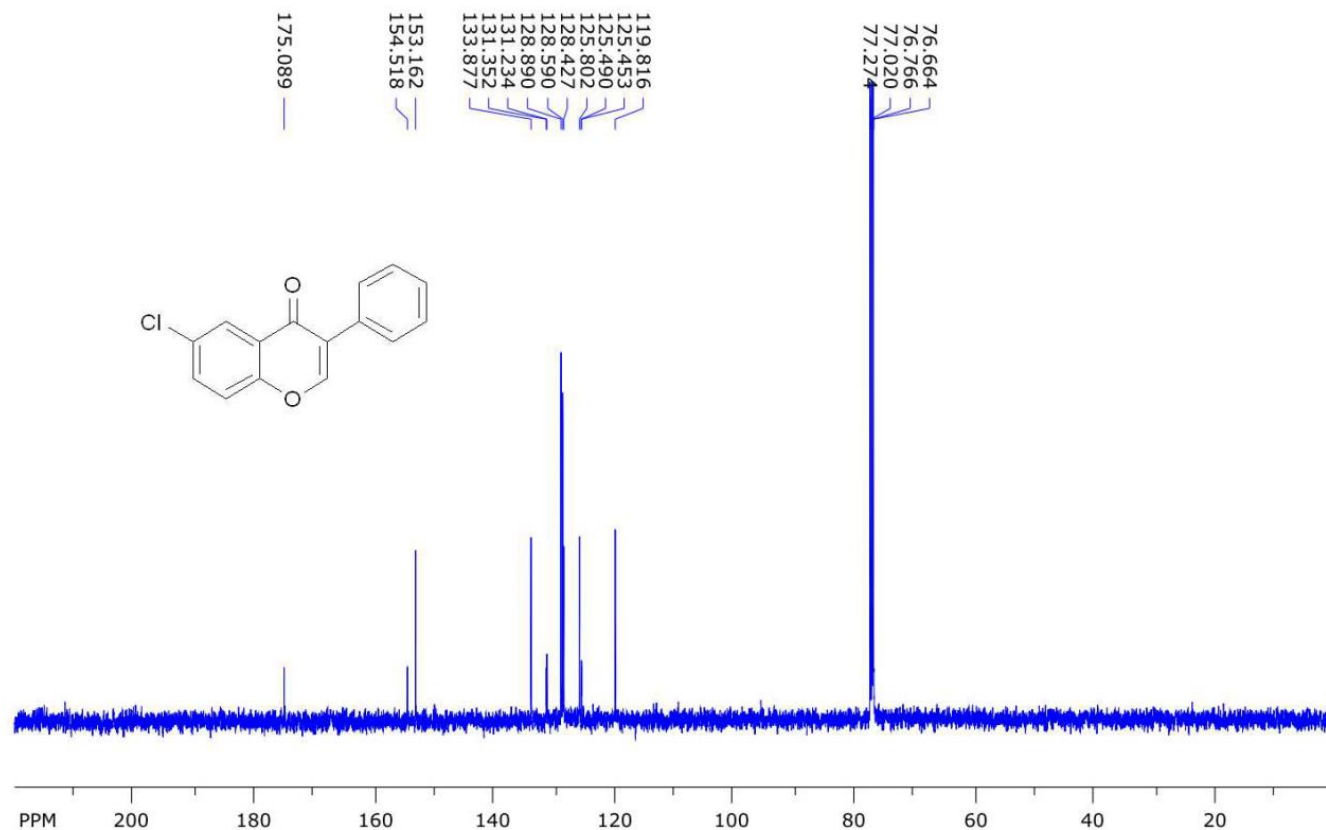

file: F:\Napo\NMR\500-1\mkr12706\26\fid expt: <zpgg30>  
 transmitter freq.: 125.772879 MHz  
 time domain size: 65536 points  
 width: 36057.69 Hz = 286.6889 ppm = 0.550197 Hz/pt  
 number of scans: 256

freq. of 0 ppm: 125.757793 MHz  
 processed size: 32768 complex points  
 LB: 2.000 GF: 0.0000  
 Hz/cm: 1110.706 ppm/cm: 8.83104

# Compound 4fk

SpinWorks 4: ISM 116 1H

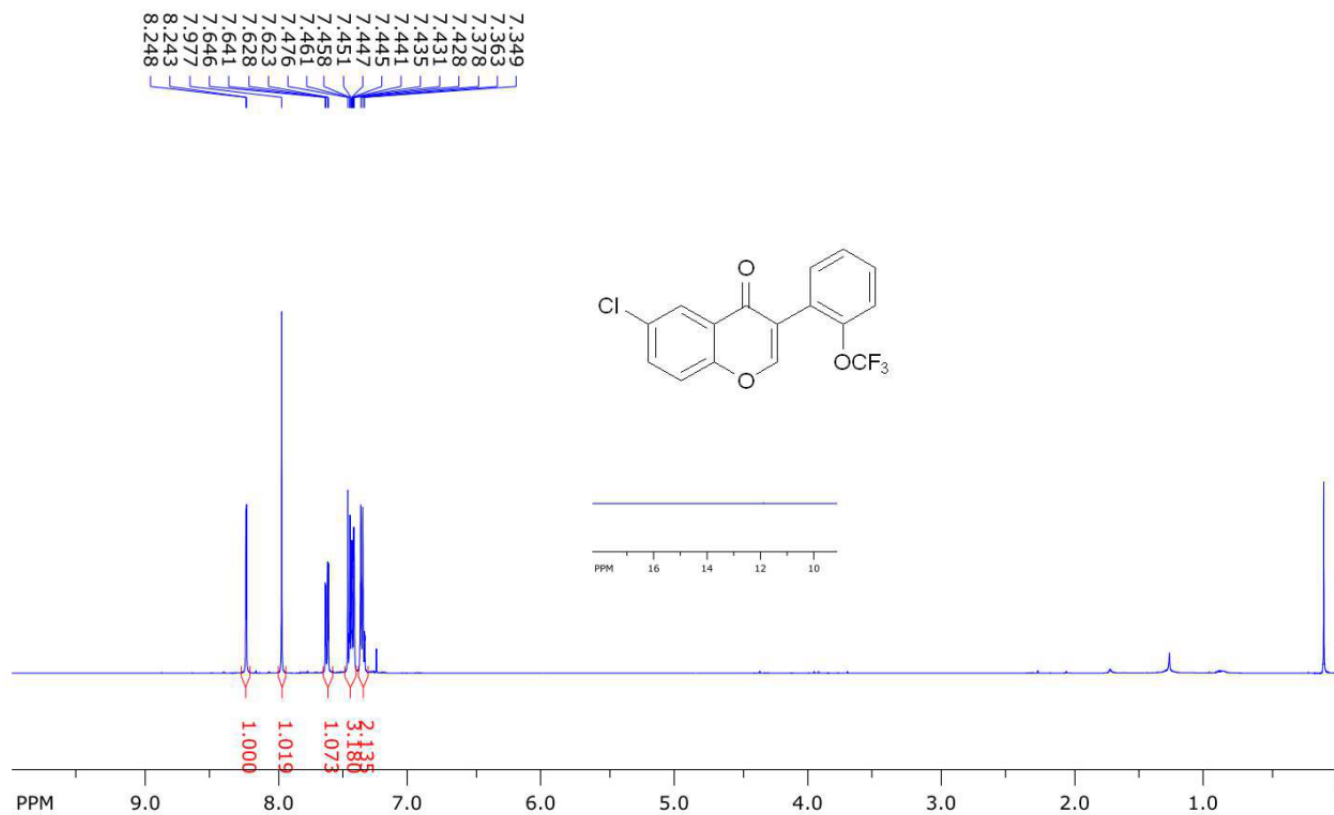

file: D:\NAPO\NMR\500-2\mkr12401\3\fid exp: <zg30>  
 transmitter freq.: 500.133001 MHz  
 time domain size: 65536 points  
 width: 12335.53 Hz = 24.6645 ppm = 0.188225 Hz/pt  
 number of scans: 24

freq. of 0 ppm: 500.130023 MHz  
 processed size: 65536 complex points  
 LB: 0.300 GF: 0.0000  
 Hz/cm: 201.407 ppm/cm: 0.40271

# Compound 4fk

SpinWorks 4: ISM 116 13C

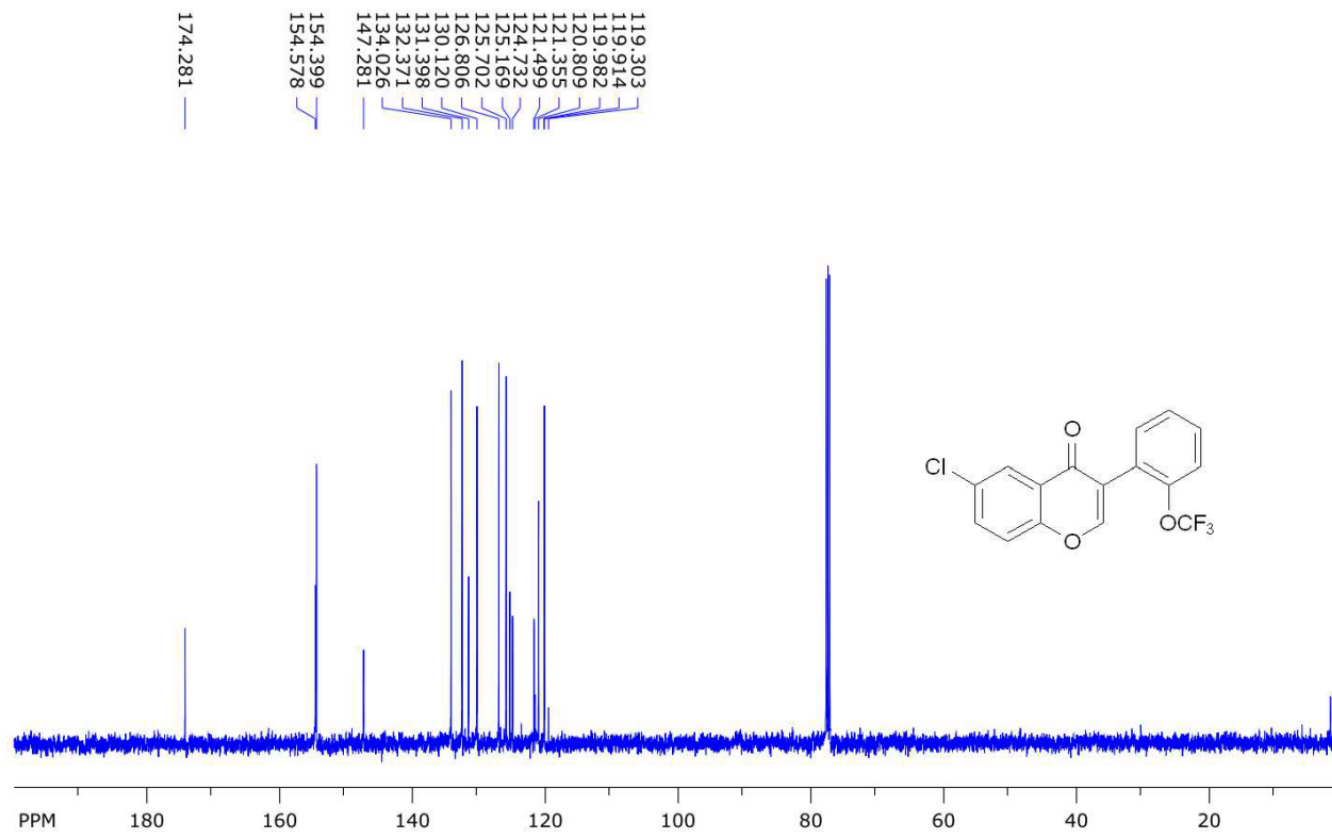

file: D:\NAPO\NMR\500-2\mkr12401\4\fid expt: <zpgg30>  
 transmitter freq.: 125.772879 MHz  
 time domain size: 65536 points  
 width: 36057.69 Hz = 286.6889 ppm = 0.550197 Hz/pt  
 number of scans: 96

freq. of 0 ppm: 125.757797 MHz  
 processed size: 32768 complex points  
 LB: 2.000 GF: 0.0000  
 Hz/cm: 1006.744 ppm/cm: 8.00446

# Compound 4ga

SpinWorks 4: ISM 71

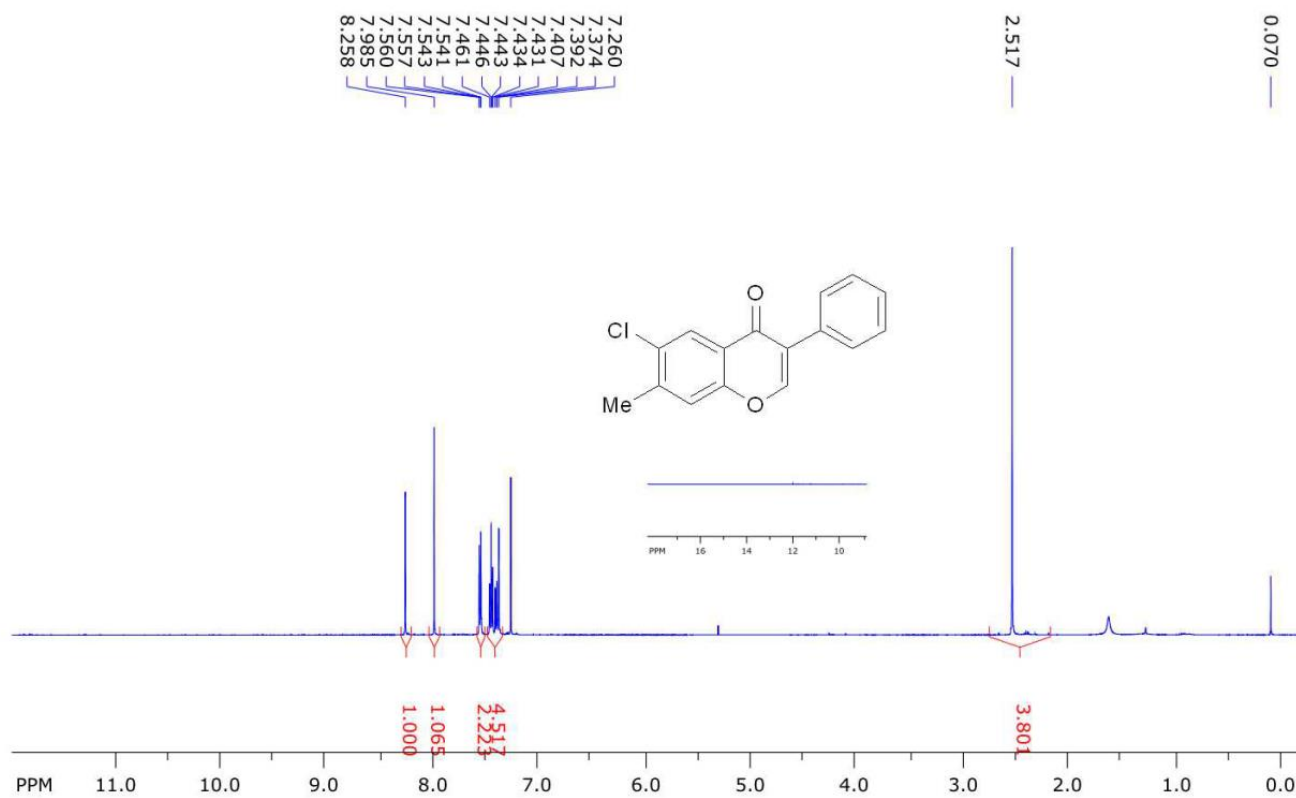

file: F:\Napo\NMR\500-1\mkr10506\9\fid expt: <zg30>  
 transmitter freq.: 500.133001 MHz  
 time domain size: 65536 points  
 width: 12335.53 Hz = 24.6645 ppm = 0.188225 Hz/pt  
 number of scans: 24

freq. of 0 ppm: 500.130023 MHz  
 processed size: 65536 complex points  
 LB: 0.300 GF: 0.0000  
 Hz/cm: 245.058 ppm/cm: 0.48999



# Compound 4ga

SpinWorks 4: ISM 71

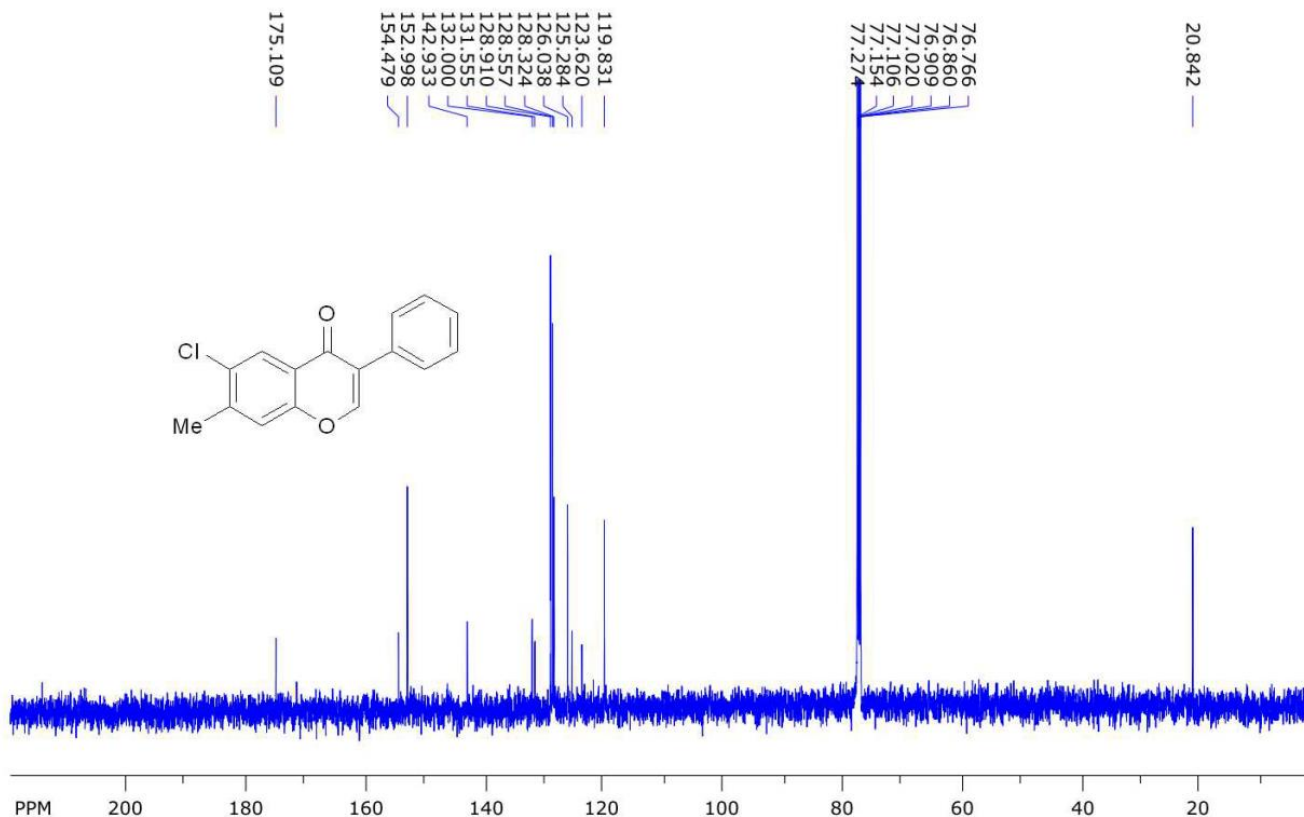

file: F:\Napo\NMR\500-1\mkr10506\10\fid expt: <zpgg30>  
 transmitter freq.: 125.772879 MHz  
 time domain size: 65536 points  
 width: 36057.69 Hz = 286.6889 ppm = 0.550197 Hz/pt  
 number of scans: 512

freq. of 0 ppm: 125.757792 MHz  
 processed size: 32768 complex points  
 LB: 2.000 GF: 0.0000  
 Hz/cm: 1102.657 ppm/cm: 8.76705

# Compound 4go

SpinWorks 4: ISM 56-2

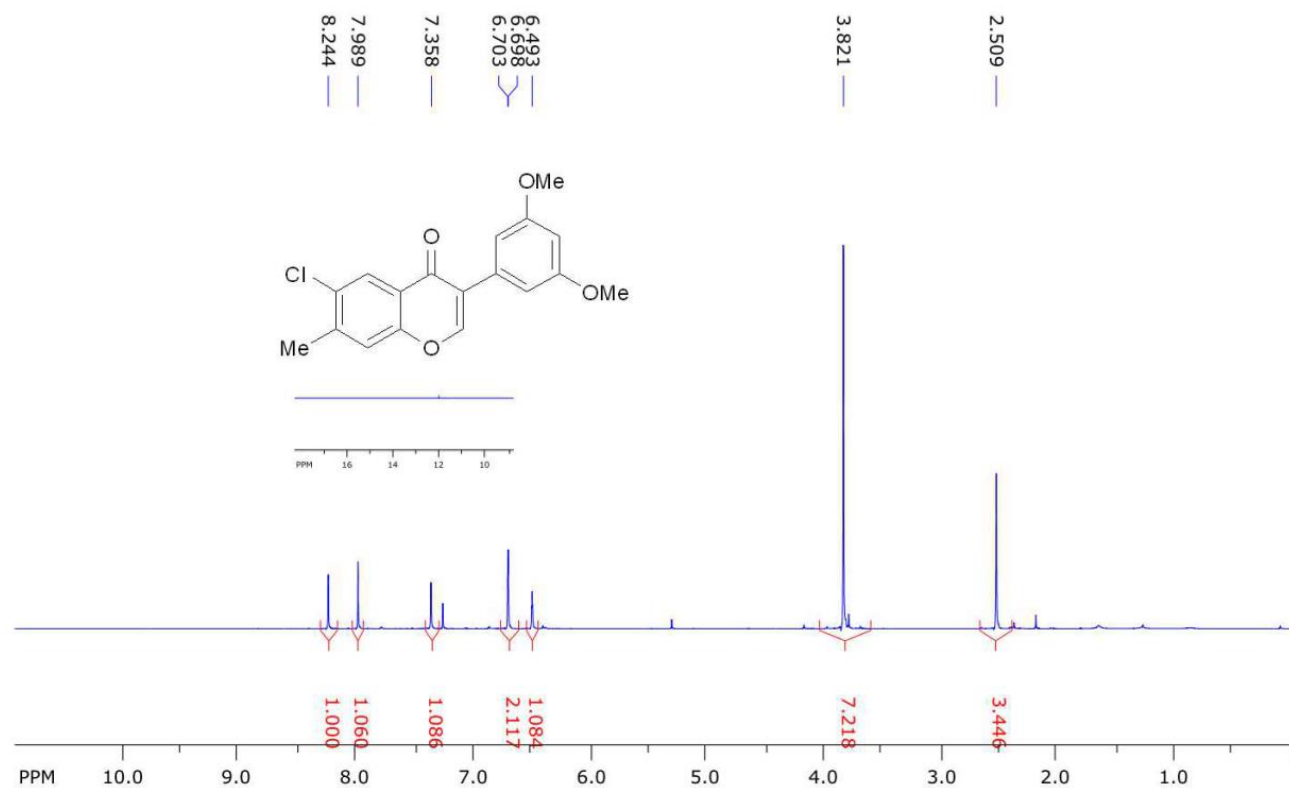

file: F:\Napo\NMR\500-1\mkr12304\3\fid expt: <zg30>  
 transmitter freq.: 500.133001 MHz  
 time domain size: 65536 points  
 width: 12335.53 Hz = 24.6645 ppm = 0.188225 Hz/pt  
 number of scans: 24

freq. of 0 ppm: 500.130023 MHz  
 processed size: 65536 complex points  
 LB: 0.300 GF: 0.0000  
 Hz/cm: 220.277 ppm/cm: 0.44044

# Compound 4go

SpinWorks 4: ISM 56-2

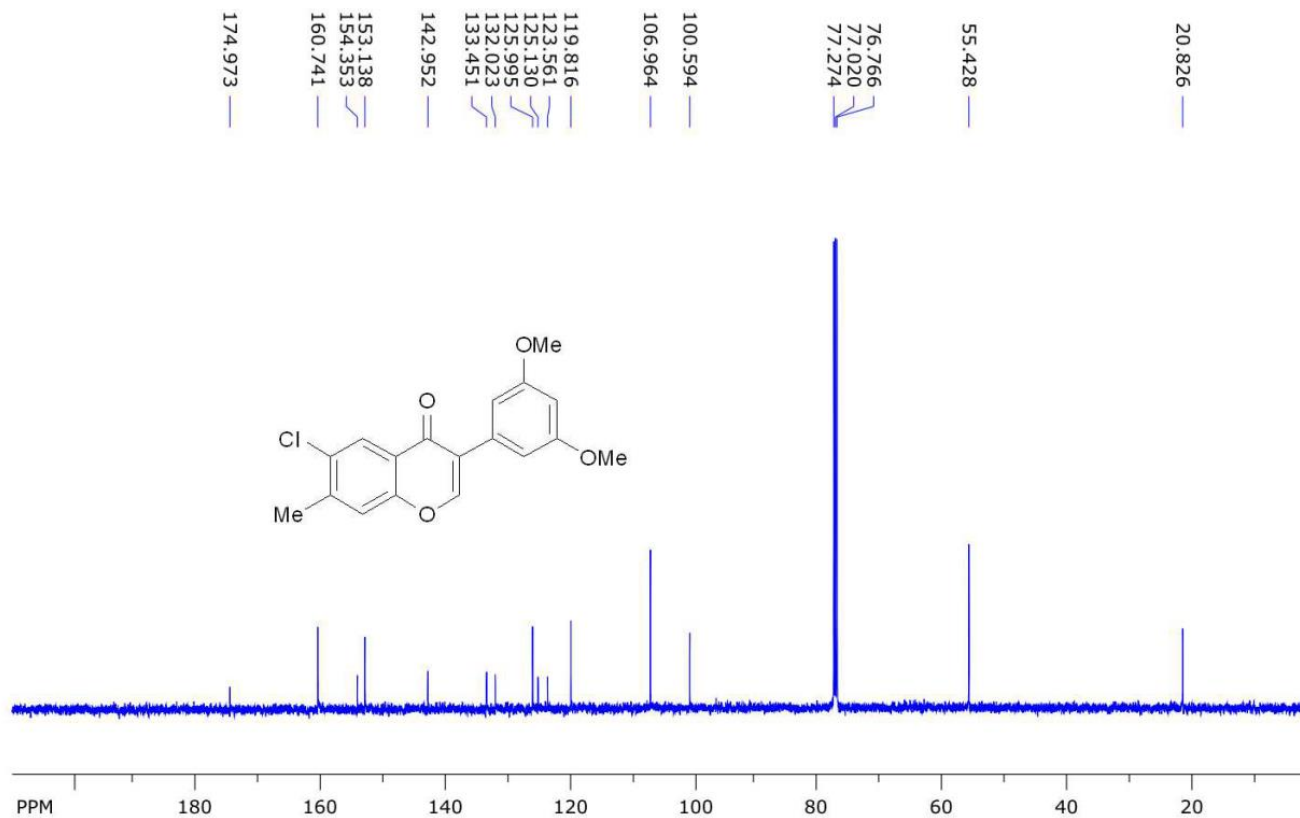

file: F:\Napo\NMR\500-1\mkr12304\4\fid expt: <zggp30>  
 transmitter freq.: 125.772879 MHz  
 time domain size: 65536 points  
 width: 36057.69 Hz = 286.6889 ppm = 0.550197 Hz/pt  
 number of scans: 256

freq. of 0 ppm: 125.757793 MHz  
 processed size: 32768 complex points  
 LB: 2.000 GF: 0.0000  
 Hz/cm: 1057.585 ppm/cm: 8.40869

# Compound 4gs

SpinWorks 4: IVA 51-2

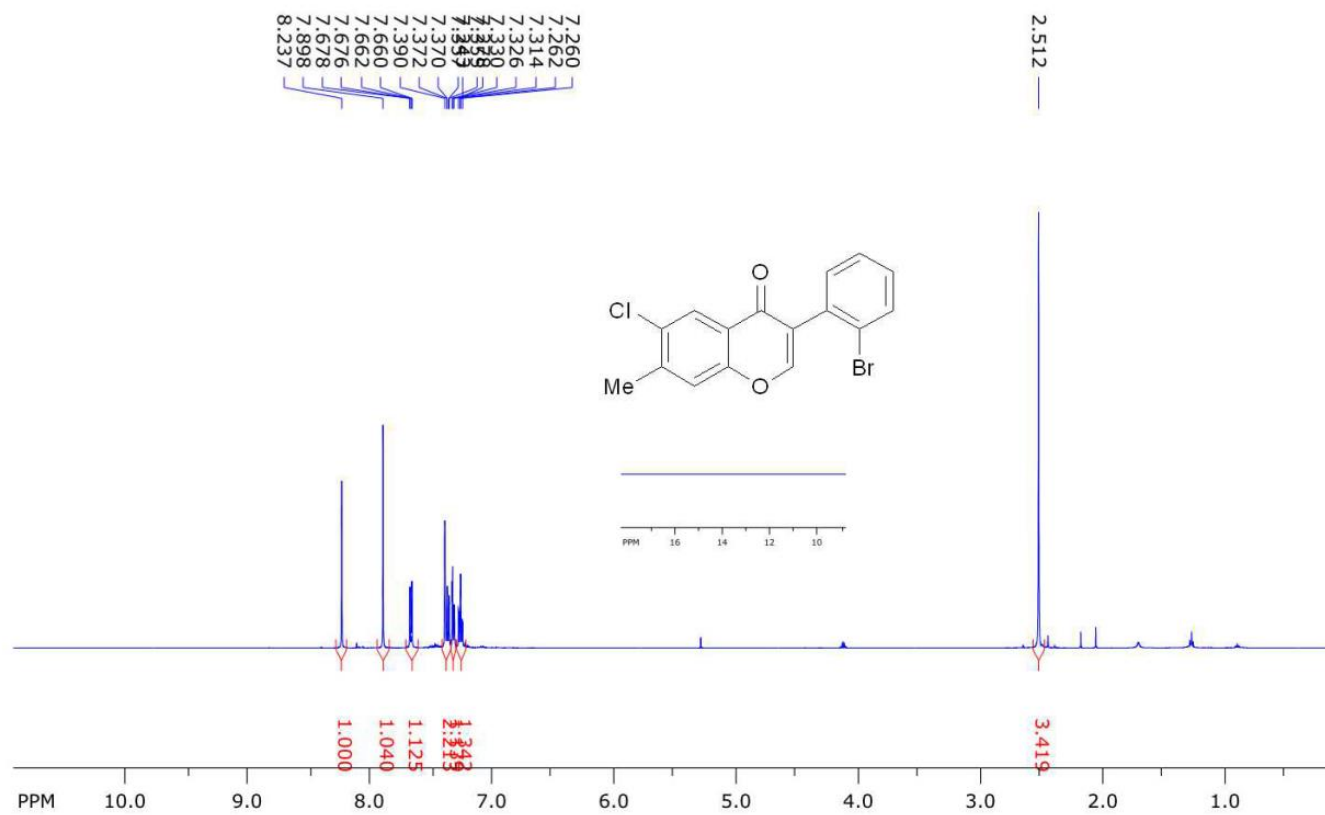

file: F:\Napo\NMR\500-1\mkr12304\13\fid expt: <zg30>  
 transmitter freq.: 500.133001 MHz  
 time domain size: 65536 points  
 width: 12335.53 Hz = 24.6645 ppm = 0.188225 Hz/pt  
 number of scans: 24

freq. of 0 ppm: 500.130023 MHz  
 processed size: 65536 complex points  
 LB: 0.300 GF: 0.0000  
 Hz/cm: 217.524 ppm/cm: 0.43493

# Compound 4gs

SpinWorks 4: ISM 51-2

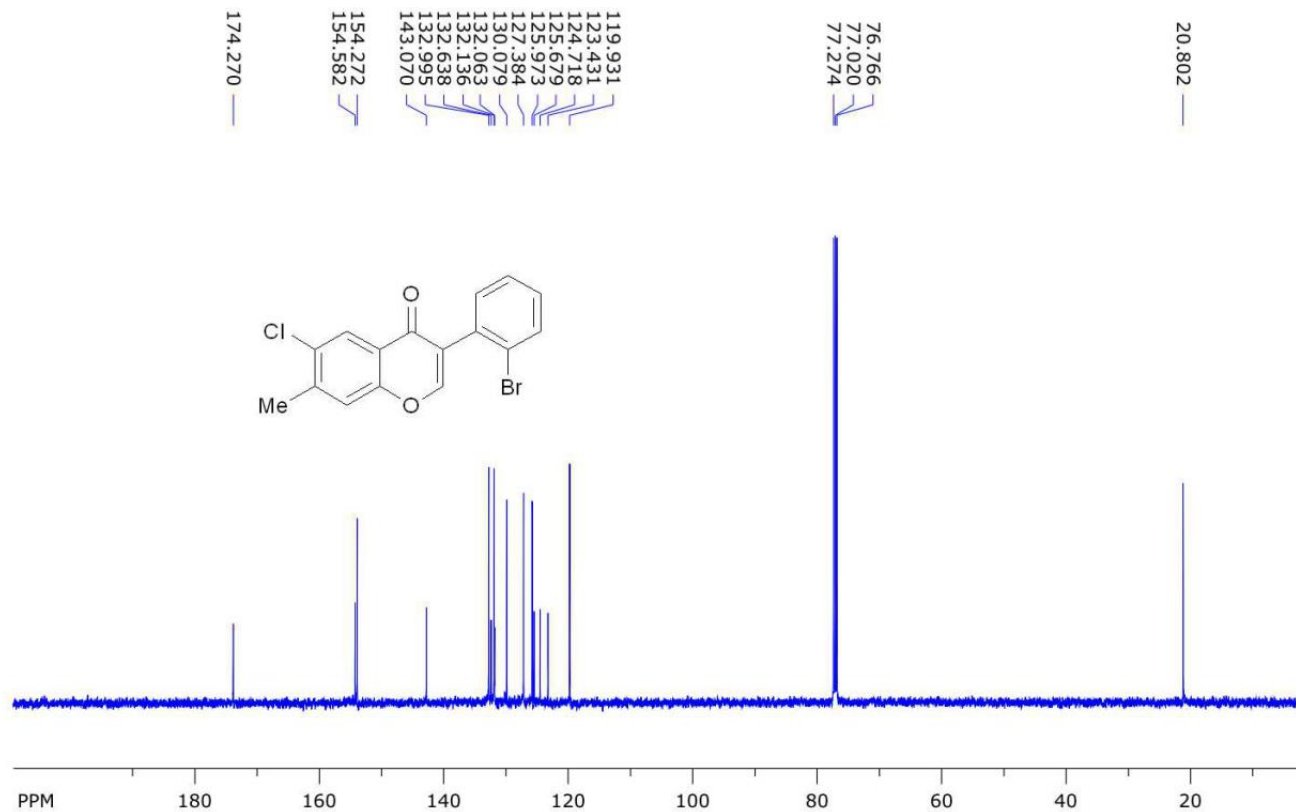

file: F:\Napo\NMR\500-1\mkr12304\14\fid expt: <zpgp30>  
transmitter freq.: 125.772879 MHz  
time domain size: 65536 points  
width: 36057.69 Hz = 286.6889 ppm = 0.550197 Hz/pt  
number of scans: 256

freq. of 0 ppm: 125.757799 MHz  
processed size: 32768 complex points  
LB: 2.000 GF: 0.0000  
Hz/cm: 1049.536 ppm/cm: 8.34470

# Compound 4gt

SpinWorks 4: ISM 55

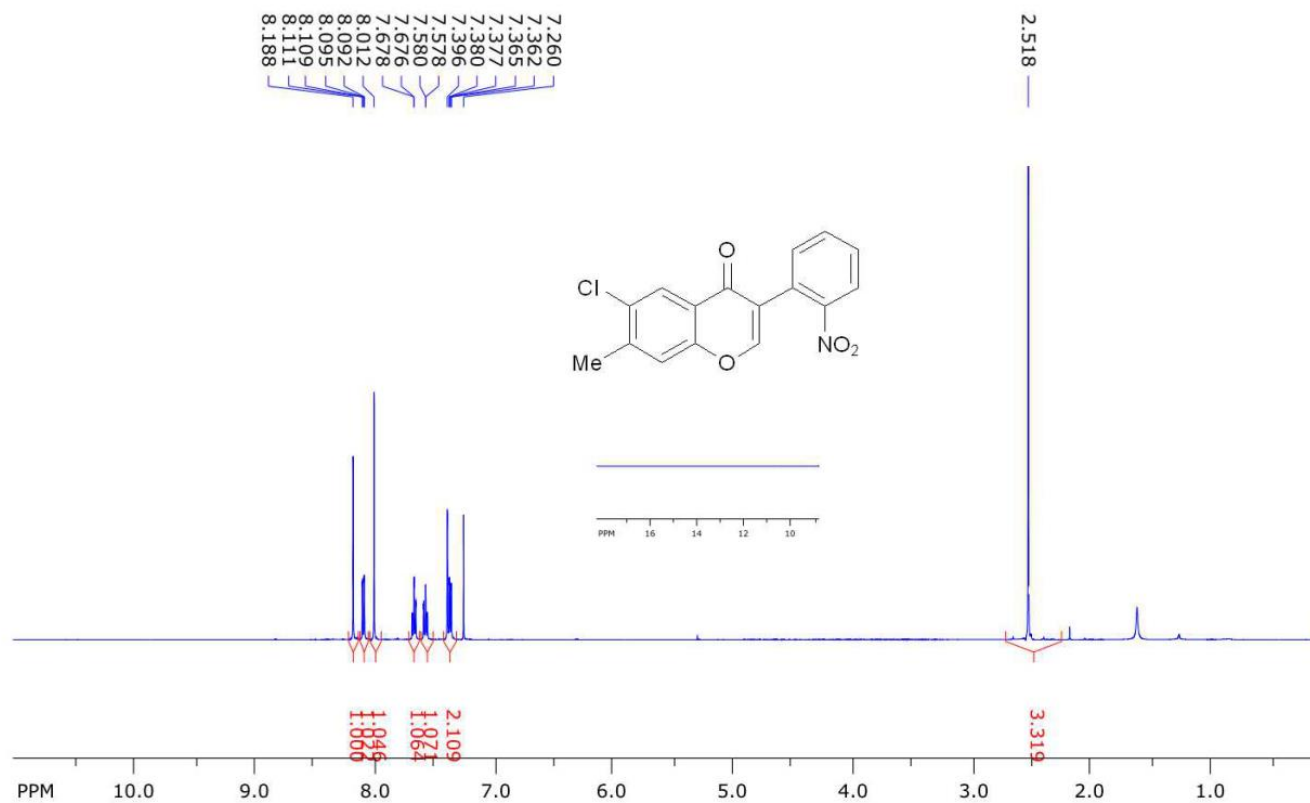

file: F:\Napo\NMR\500-1\mkr10506\3\fid expt: <zg30>  
 transmitter freq.: 500.133001 MHz  
 time domain size: 65536 points  
 width: 12335.53 Hz = 24.6645 ppm = 0.188225 Hz/pt  
 number of scans: 24

freq. of 0 ppm: 500.130023 MHz  
 processed size: 65536 complex points  
 LB: 0.300 GF: 0.0000  
 Hz/cm: 219.727 ppm/cm: 0.43934

# Compound 4gt

SpinWorks 4: ISM 55

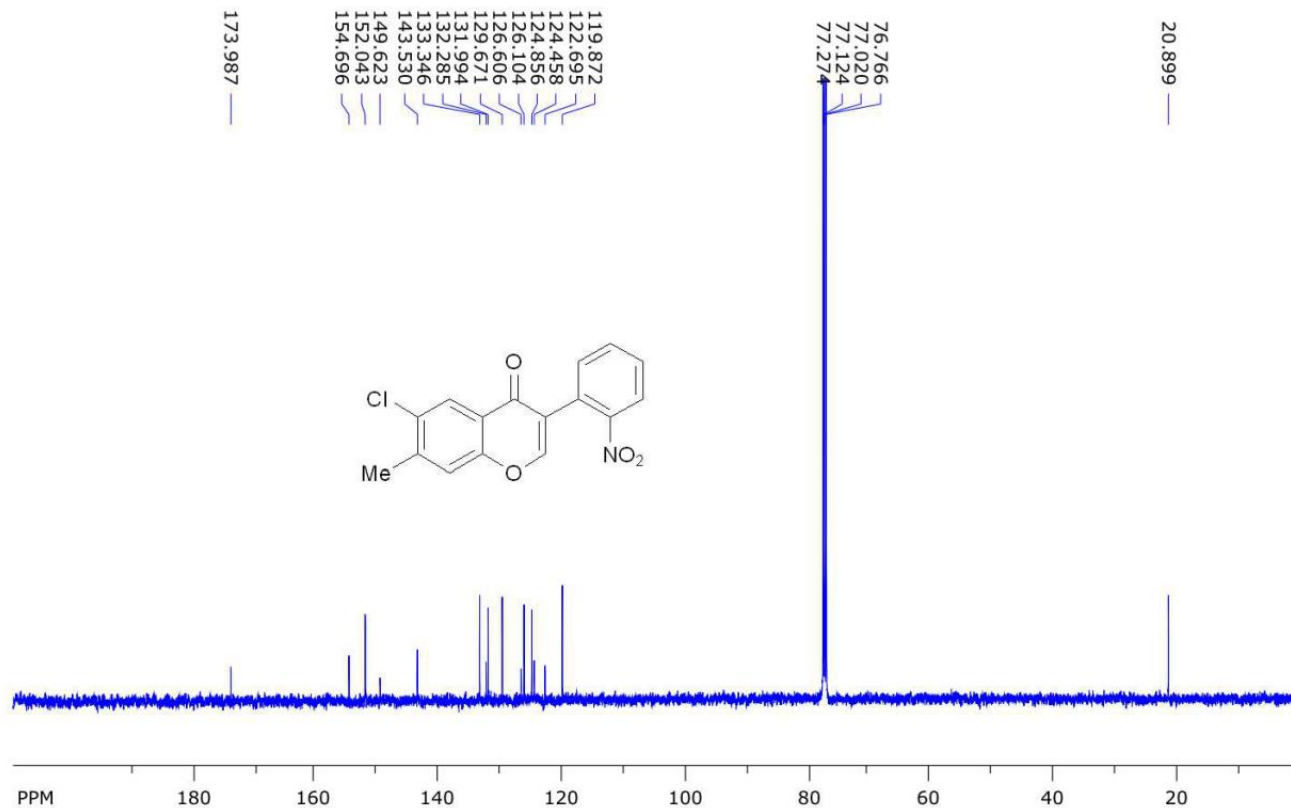

file: F:\Napo\NMR\500-1\mkr10506\4\fid expt: <zgpg30>  
 transmitter freq.: 125.772879 MHz  
 time domain size: 65536 points  
 width: 36057.69 Hz = 286.6889 ppm = 0.550197 Hz/pt  
 number of scans: 512

freq. of 0 ppm: 125.757793 MHz  
 processed size: 32768 complex points  
 LB: 2.000 GF: 0.0000  
 Hz/cm: 1057.585 ppm/cm: 8.40869

# Compound 4hl

SpinWorks 4: ISM 103 1H

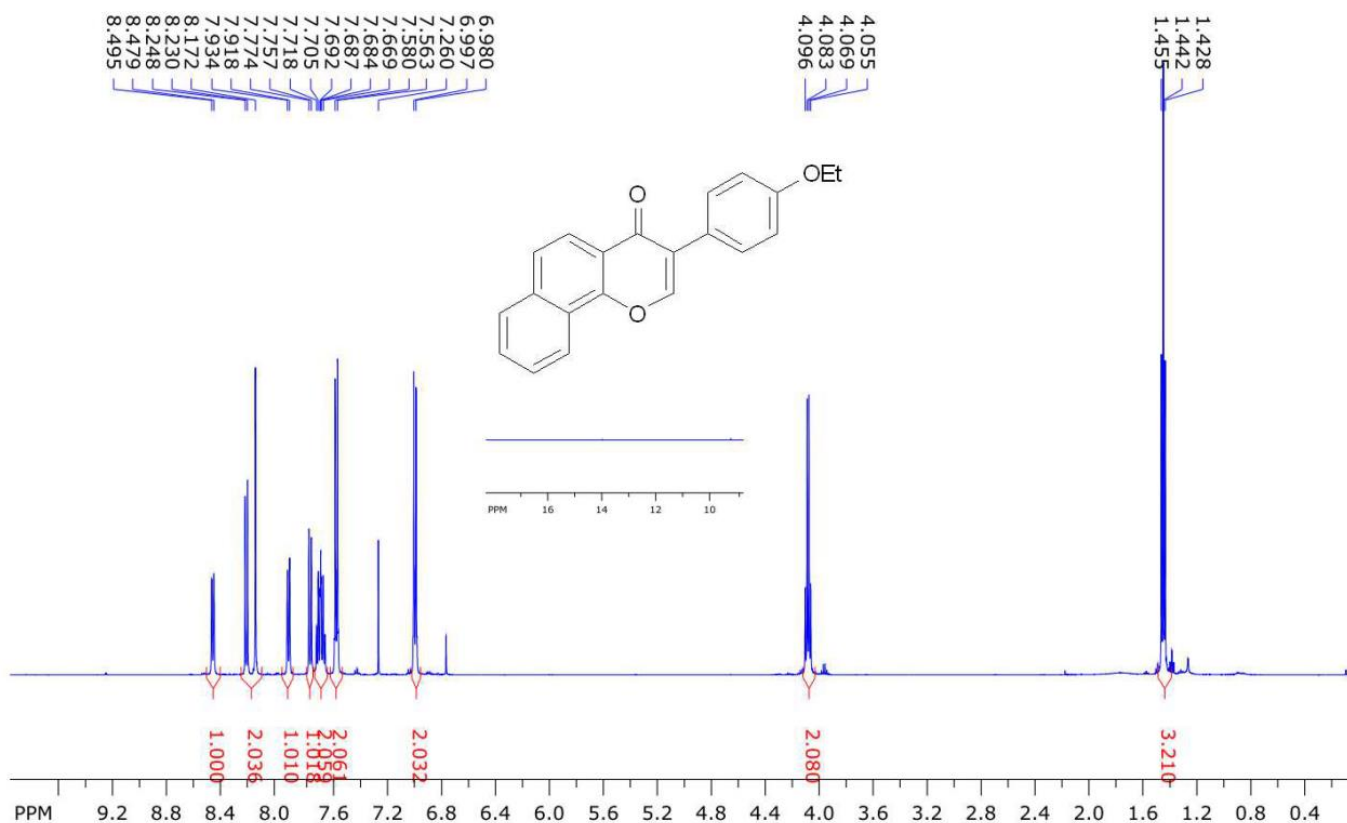

file: D:\NAPO\NMR\500-2\mkr11412\27\fid expt: <zg30>  
transmitter freq.: 500.133001 MHz  
time domain size: 65536 points  
width: 12335.53 Hz = 24.6645 ppm = 0.188225 Hz/pt  
number of scans: 24

freq. of 0 ppm: 500.130023 MHz  
processed size: 65536 complex points  
LB: 0.300 GF: 0.0000  
Hz/cm: 199.224 ppm/cm: 0.39834



# Compound 4hl

SpinWorks 4: ISM 103 13C

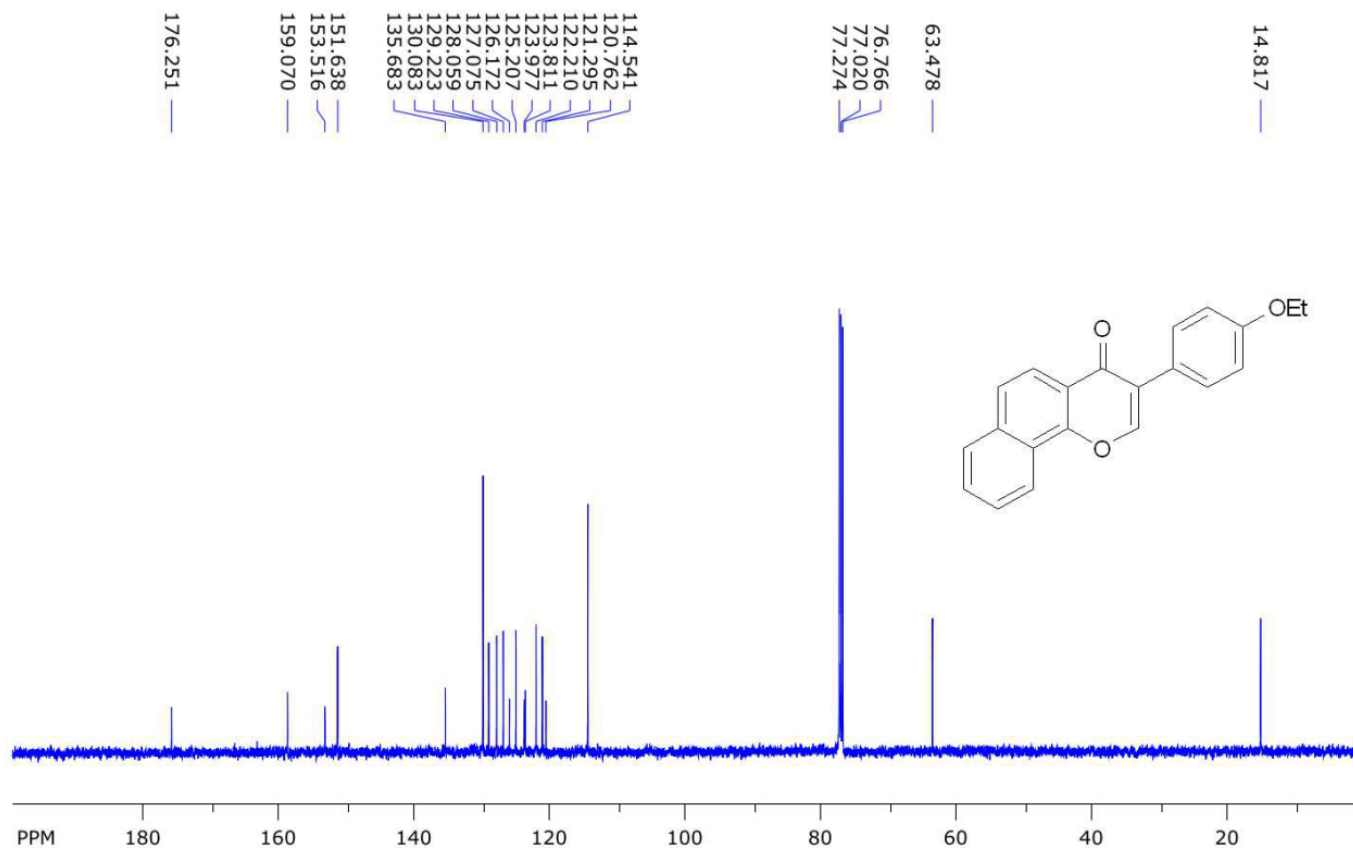

file: D:\NAPO\NMR\500-2\mkr11412\28\fid expt: <zgpg30>  
transmitter freq.: 125.772879 MHz  
time domain size: 65536 points  
width: 36057.69 Hz = 286.6889 ppm = 0.550197 Hz/pt  
number of scans: 256

freq. of 0 ppm: 125.757796 MHz  
processed size: 32768 complex points  
LB: 2.000 GF: 0.0000  
Hz/cm: 1006.744 ppm/cm: 8.00446

# Compound 4hq

SpinWorks 4: ISM 121 1H

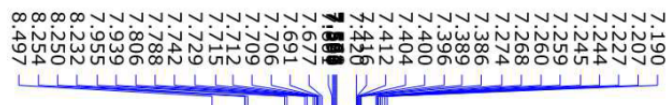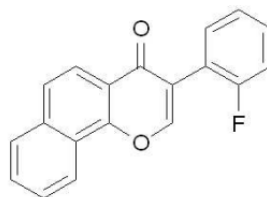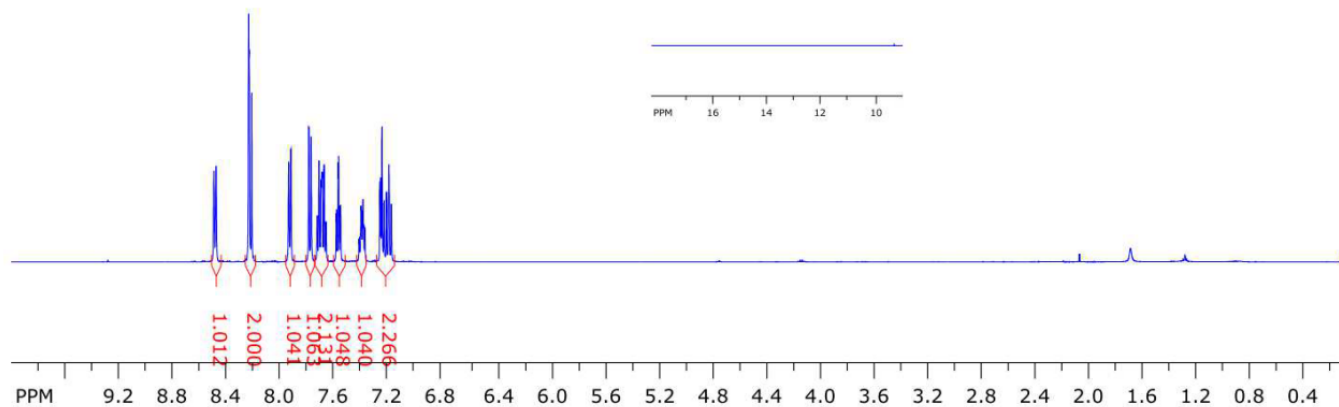

file: D:\NAPO\NMR\500-2\mkr12102\35\fid expt: <zg30>  
 transmitter freq.: 500.133001 MHz  
 time domain size: 65536 points  
 width: 12335.53 Hz = 24.6645 ppm = 0.188225 Hz/pt  
 number of scans: 24

freq. of 0 ppm: 500.130019 MHz  
 processed size: 65536 complex points  
 LB: 0.300 GF: 0.0000  
 Hz/cm: 199.224 ppm/cm: 0.39834

# Compound 4hq

SpinWorks 4: ISM 121 13C

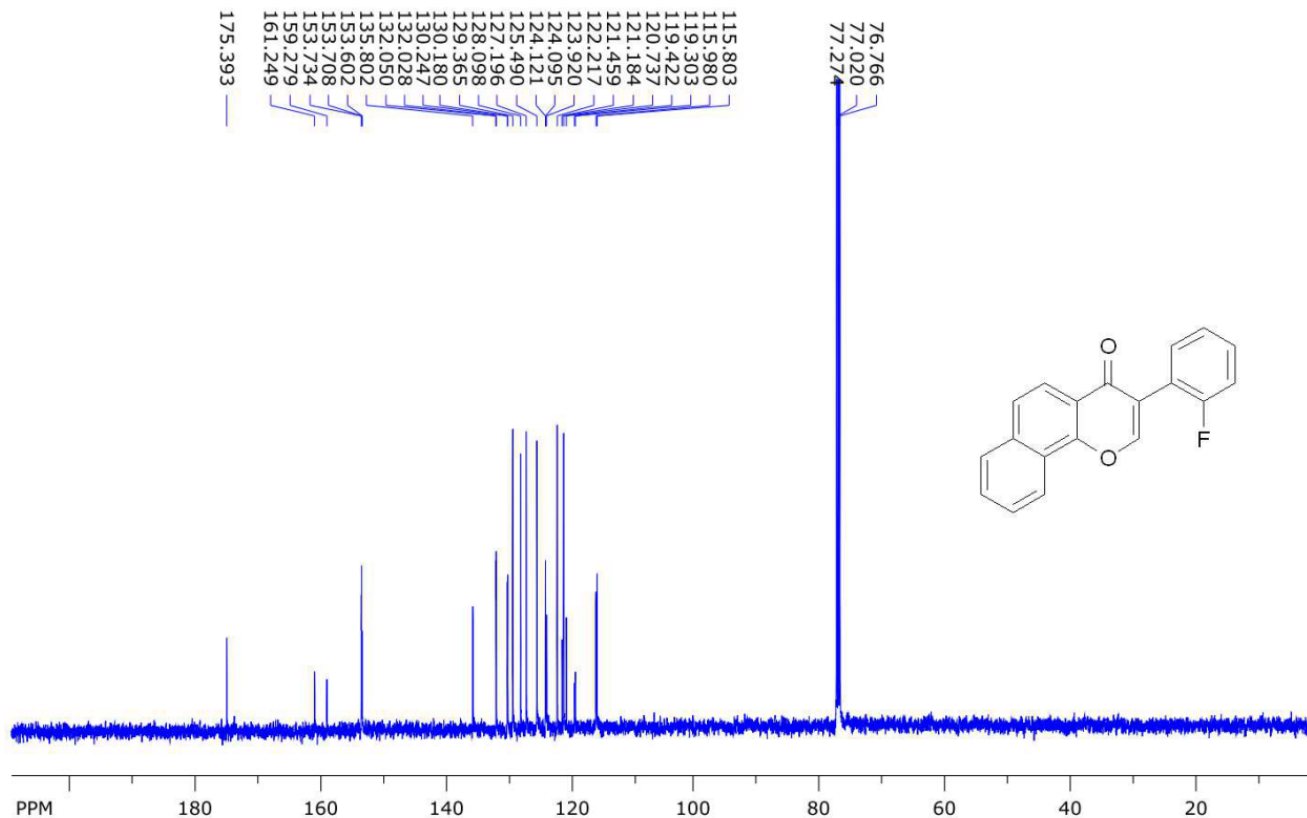

file: D:\NAPO\NMR\500-2\mkr12102\36\fid expt: <zpgg30>  
transmitter freq.: 125.772879 MHz  
time domain size: 65536 points  
width: 36057.69 Hz = 286.6889 ppm = 0.550197 Hz/pt  
number of scans: 512

freq. of 0 ppm: 125.757795 MHz  
processed size: 32768 complex points  
LB: 2.000 GF: 0.0000  
Hz/cm: 1056.203 ppm/cm: 8.39770
